# Supplementary material for: Managing PMT/vPvM substances in consumer products through the concepts of essential-use and functional substitution: a case-study for cosmetics
Source: Royal Society of Chemistry journal article supplement (doi:10.1039/d3em00025g), 2023-01-01
Supplement: d3em00025g2.xlsx [file d3em00025g2.xlsx]

## Sheet: Sheet1
SI2 - Supplementary information to
Managing PMT/vPvM Substances in Consumer Products through the Concepts of Essential Use and Functional Substitution: a Case-Study for Cosmetics
Joanke van Dijk1, 2, Romain Figuiere3*, Stefan C. Dekker1, Annemarie P. van Wezel2, Ian Cousins3
*: Corresponding author: Romain Figuière (romain.figuiere@aces.su.se)
1 Copernicus Institute of Sustainable Development, Utrecht University, 3584 CB Utrecht, the Netherlands; 2 Institute for Biodiversity and Ecosystem Dynamics, University of Amsterdam, PO Box 94240, 1090 GE Amsterdam, the Netherlands; 3 Department of Environmental Science, Stockholm University, SE-10691 Stockholm, Sweden.
This files gathers the tables S1, S2-1, S2-2 and S3. All the information concerning these tables are provided in the main supplementary information file (please refer to the PDF file)
Table S2.1: List of PMT/vPvM substances listed in Cosing database, their functions and the type of products in which they are used

## Sheet: Table S2.1
Table S2.1: List of PMT/vPvM substances listed in Cosing database, their functions and the type of products in which they are used
Name	CAS number	Technical function	Listed in products database		Products Type		Prioritisation rank based on Schulze et al. (2018)	Prioritisation rank based on Fries et al. (2022)
			Kemiluppen	Cosmethics	Products category	Subcategory
TRICLOSAN	3380-34-5	Antimicrobial/Deodorant/Preservative	YES	NO	Soap and hygiene	Toothpaste	215	75
BENZOTRIAZOLE	95-14-7	Antimicrobial	YES	NO	Suncare	Sun cream	Not found	95
BENZOPHENONE-3	131-57-7	Light stabilizer/UV absorber/UV filter	YES	YES	Facial care	Make-up remover, Day cream, Colored day cream, Lip balm, Moisturisers	Not found	58
					Hair care	Hair cream, Hairspray, Wax, Serum
					Make-up	Foundation cream, Blush, Powder, Lipstick, Lip gloss, Nail polish, Nail care, Nail polish remover, Perfume
					Body care	Oil
					Suncare	Self-tanner, Sun cream, Sun spray, Sun stick
					Soap and hygiene	Body shampoo, Body wash
BENZOPHENONE-4	4065-45-6	Light stabilizer/UV absorber/UV filter	YES	YES	Facial care	Cleansers	428	Not found
					Hair care	Conditioner, Shampoo, Hair spray, Styling cream
					Make-up	Lipstick, Lip gloss
					Body care	Ointment, Scrub, Hand care
					Suncare	Self-tanner
					Soap and hygiene	Bath salts, Body shampoo, Liquid hand soap, Wet wipes, Body wash, Shower gel
CI 16035	25956-17-6	Colorant/Hair dyeing	YES	YES	Facial care	Make-up remover (skin and eye), day cream, lip balm, mask, scrub, skintonic, eye care	500	Not found
					Hair care	Conditioner, Hair cream, Hair color, Hairspray, Shampoo, Wax
					Make-up	Blush, Concealer, powder, Lipstick/Lip gloss, Nail polish, nail care, perfume, eyeliner, eye shadows
					Body care	Cream, Hand care, Scrub, Foot care
					Suncare	Self-tanner, Sun cream, Sun spray
					Soap and hygiene	Bubble bath, Body shampoo, Hand disinfection, Liquid hand soap, Mouthwash, Toothpaste
					Other	Gift boxes, Theatre make-up
CLIMBAZOLE	38083-17-9	Anti-seborrheic/Preservative	YES	YES	Hair care	Conditioner, Shampoo, Scalp care	563	Not found
DIMETHYL ETHER	115-10-6	Propellant/Solvent/Viscosity Controlling	YES	YES	Facial care	Skintonic	Not found	84
					Hair care	Conditioner, Hair color, Hairspray, Hair mousse, Shampoo, Wax
					Suncare	Self-tanner, Sun cream, Sun spray
					Soap and hygiene	Deodorant spray, Hand disinfection
DISILOXANE	107-46-0	Antifoaming/Skin conditioning	YES	NO	Facial care	Mask	Not found	114
					Hair care	Conditioner, Hair oil, Shampoo
					Make-up	Lipstick, Lip gloss, Nail polish, Nail care, Primer
					Body care	Oil
EDTA	60-00-4	Chelating	YES	YES	Facial care	Make-up remover, Day cream, Scrub, Moisturisers	Not found	87
					Hair care	Conditioner, Hair color, Hairspray, Shampoo, Wax
					Make-up	Cream, Mascara, Primer, Eyebrows
					Body care	Cream, Scrub
					Soap and hygiene	Deadorant spray and stick, Liquid hand soap, Teeth whitening
GUANIDINE CARBONATE	593-85-1	Buffering/Skin conditioning	YES	NO	Facial care	Day cream	178	Not found
					Hair care	Shampoo
					Body care	Cream, Ointment
					Soap and hygiene	Deodorant roll-on
HYDROXYETHYLPIPERAZINE ETHANE SULFONIC ACID	7365-45-9	Buffering	YES	YES	Facial care	Day cream, Mask, Night cream, Scrub, Serum, Skintonic, Eye care, Moisturisers	439	Not found
					Make-up	Foundation liquid
					Body care	Cream, Hand care, Ointment
PENTASODIUM PENTETATE	140-01-2	Chelating	YES	YES	Facial care	Day cream, Night cream	42	Not found
					Shaving and hair removal	Razor
					Hair care	Jelly, Hair bleaching, Hair color, Shampoo
					Make-up	Lash color
					Body care	Cream, Hand care
					Soap and hygiene	Solid hand soap
PHENYLETHYL RESORCINOL	85-27-8	Antioxidant	YES	NO	Facial care	Day cream, Serum	734	Not found
					Suncare	Sun cream
POTASSIUM ACESULFAME	55589-62-3	Fragrance	YES	NO	Soap and hygiene	Mouthwash	277	Not found
BENZOGUANAMINE	91-76-9	Antioxidant/Fragrance	YES	NO	Make-up	Nail polish	67	Not found
BIS-TRIMETHYLBENZOYL PHENYLPHOSPHINE OXIDE	162881-26-7	Light stabilizer	YES	NO	Make-up	Nail polish	299	88
ACETAMINOPHEN	103-90-2	Skin conditioning	YES	NO	Hair care	Hair spray	Not found	48
CHLORHEXIDINE	55-56-1	Oral care/Preservative	YES	NO	Hair care	Conditioner, Hair color	Not found	Not found
P-AMINOPHENOL	123-30-8	Hair dyeing	YES	NO	Hair care	Hair color	Not found	67
BENZOPHENONE	119-61-9	Fragrance/Light Stabilizer	YES	NO	Hair care, Soap and hygiene	Deodorant spray, Hair Spray	Not found	64
2-ACRYLAMIDO-2-METHYLPROPANE SULFONIC ACID	15214-89-8	Not reported	NO	NO	NA	NA	257	66
4,4'-ISOPROPYLIDENEDIPHENOL/EPICHLOROHYDRIN COPOLYMER	25068-38-6	Film forming	NO	NO	NA	NA	Not found	Not found
AZOBISISOBUTYRONITRILE	78-67-1	Not reported	NO	NO	NA	NA	176	34
BENZOTHIAZOLE	95-16-9	Perfuming	NO	NO	NA	NA	43	39
CI 21108	5567-15-7	Colorant	NO	NO	NA	NA	118	5
CI 73000	482-89-3	Colorant	NO	NO	NA	NA	80	41
DICYCLOHEXYL SODIUM SULFOSUCCINATE	23386-52-9	Cleansing/Foam boosting/Surfactant/Hydrotrope	NO	NO	NA	NA	304	Not found
DIMETHYL 2,6-NAPHTHALATE	840-65-3	Skin conditioning	NO	NO	NA	NA	Not found	Not found
DIMETHYL IMIDAZOLIDINONE	80-73-9	Hair conditioning/Humectant/Skin conditioning	NO	NO	NA	NA	Not found	Not found
DIMETHYLACRYLAMIDE	284-95-7, 2680-03-7	Not reported	NO	NO	NA	NA	Not found	50
FORMAMIDINE SULFINIC ACID	1758-73-2	Reducing	NO	NO	NA	NA	Not found	Not found
HYDROXY TETRAMETHYLPIPERIDINE OXIDE	2226-96-2	Antioxidant	NO	NO	NA	NA	286	Not found
IBUPROFEN	15687-27-1	Skin conditioning	NO	NO	NA	NA	Not found	Not found
MESITYLENE	108-67-8	Solvent	NO	NO	NA	NA	Not found	109
METHENAMINE	100-97-0	Antimicrobial/Preservative	NO	NO	NA	NA	Not found	4
NAPROXEN	22204-53-1	Skin conditioning	NO	NO	NA	NA	Not found	Not found
P-CHLOROPHENOL	106-48-9	Antimicrobial	NO	NO	NA	NA	Not found	Not found
PENTETIC ACID	67-43-6	Chelating	NO	NO	NA	NA	187	83
PHOSPHONOBUTANETRICARBOXYLIC ACID	37971-36-1	Anticorrosive/Buffering/Chelating	NO	NO	NA	NA	Not found	Not found
SODIUM DIETHYLENETRIAMINE PENTAMETHYLENE PHOSPHONATE	22042-96-2	Chelating	NO	NO	NA	NA	Not found	Not found
T-BUTYL METHYL ETHER	1634-04-4	Solvent	NO	NO	NA	NA	3	92
TRICHLOROETHANE	71-55-6	Solvent	NO	NO	NA	NA	Not found	115
TRIETHYL PHOSPHATE	78-40-0	Solvent	NO	NO	NA	NA	Not found	80
TRIFLUOROACETIC ACID	1976-05-01	pH Adjusters	NO	NO	NA	NA	218	42
