# Supplementary material for: Managing PMT/vPvM substances in consumer products through the concepts of essential-use and functional substitution: a case-study for cosmetics
Source: Royal Society of Chemistry journal article supplement (doi:10.1039/d3em00025g), 2023-01-01
Supplement: d3em00025g3.xlsx [file d3em00025g3.xlsx]

## Sheet: Sheet1
SI3 - Supplementary information on shortlisting alternatives to
Managing PMT/vPvM Substances in Consumer Products through the Concepts of Essential Use and Functional Substitution: a Case-Study for Cosmetics
Joanke van Dijk1, 2, Romain Figuiere3*, Stefan C. Dekker1, Annemarie P. van Wezel2, Ian Cousins3
*: Corresponding author: Romain Figuière (romain.figuiere@aces.su.se)
1 Copernicus Institute of Sustainable Development, Utrecht University, 3584 CB Utrecht, the Netherlands; 2 Institute for Biodiversity and Ecosystem Dynamics, University of Amsterdam, PO Box 94240, 1090 GE Amsterdam, the Netherlands; 3 Department of Environmental Science, Stockholm University, SE-10691 Stockholm, Sweden.
This files gathers the tables S2-1 and S2-2. All the information concerning these tables are provided in the main supplementary information file (please refer to the PDF file)
Table S3.1: list of restricted substances from authorities, industry or non-governmental organisations (NGOs) included in the SUBSPORT portal
Table S3.2.1: Authoritative list screening of potential alternatives to the substances of interest
Table S3.2.2: List of shorlisted potential alternatives for further assessment

## Sheet: Table SI3.1
List name	Type of list	Link
Boots: Priority Substances List, Materials Restricted for Use	Company of Sector Lists	https://www.walgreens.com/images/adaptive/si/pdf/WalgreensBootsAllianceRestrictedSubstancesList_11082018.pdf
Dell: Restricted Materials Guidance Document	Company of Sector Lists	https://i.dell.com/sites/csdocuments/Legal_Docs/en/env0424_a09.pdf
Volvo's Grey List: Chemical substances whose use within the Volvo Group shall be limited	Company of Sector Lists	https://www.volvogroup.com/en/suppliers/our-supplier-requirements.html
Volvo's Black List: Chemical substances which must not be used within the Volvo Group	Company of Sector Lists	https://www.volvogroup.com/en/suppliers/our-supplier-requirements.html
Global Automotive Declarable Substance List	Company of Sector Lists	https://www.gadsl.org/
BSSL Bluesign System Substances List	Company of Sector Lists	https://www.bluesign.com/downloads/bssl/2022/bssl_v13.0.pdf
OEKO-TEX Standard 100	Company of Sector Lists	https://www.oeko-tex.com/en/
Zero Discharge of Hazardous Chemicals Programme: Manufacturing restricted substances list	Company of Sector Lists	https://mrsl.roadmaptozero.com/
Vestas Blacklist	Company of Sector Lists	https://www.subsportplus.eu/subsportplus/EN/Substances/individual-substance-lists/37_Vestas_Blacklist.html
H&M Group: Chemical Restrictions	Company of Sector Lists	https://hmgroup.com/sustainability/circularity-and-climate/chemicals/chemical-restrictions/
SC Johnson Green List	Company of Sector Lists	https://www.whatsinsidescjohnson.com/us/en/not-allowable-materials
Nokia Substance List	Company of Sector Lists	https://www.nokia.com/sites/default/files/2021-01/Nokia%20Substance%20List%202021_11_1.pdf
REACH Candidate List	EU Regulatory Lists	https://echa.europa.eu/en/candidate-list-table
REACH Authorisation List	EU Regulatory Lists	https://echa.europa.eu/en/authorisation-list
REACH Restriction List	EU Regulatory Lists	https://echa.europa.eu/substances-restricted-under-reach
List of non-approved substances under Biocidal Products Regulation	EU Regulatory Lists	https://eur-lex.europa.eu/legal-content/EN/ALL/?uri=celex%3A32012R0528
List of prohibited substances in Annex II of Cosmetic Products Regulation	EU Regulatory Lists	https://eur-lex.europa.eu/legal-content/EN/ALL/?uri=celex%3A32009R1223
Water Framework Directive, List of Priority Substances	EU Regulatory Lists	https://eur-lex.europa.eu/legal-content/EN/TXT/?qid=1600272045691&uri=CELEX:32008L0105
EU Regulation on Persistent Organic Pollutants	EU Regulatory Lists	https://eur-lex.europa.eu/legal-content/EN/ALL/?uri=CELEX%3A32019R1021
RoHS Directive	EU Regulatory Lists	https://eur-lex.europa.eu/legal-content/EN/ALL/?uri=celex%3A32009R1223
KEMI: PRIO Database - List of phase-out substances	Governmental Lists	https://www.kemi.se/prioguiden/english/search?andOrValue=0&orderBy=PriorityLevel_EN&sortDirection=1&hitsPerPage=20&tab=defaultSearch
Canadian Environmental Protection Agency: Priority Substances List	Governmental Lists	https://www.canada.ca/en/environment-climate-change/services/canadian-environmental-protection-act-registry/substances-list/toxic/schedule-1.html
US Environmental Protection Agency: Extremely Hazardous Substance List	Governmental Lists	https://www.ecfr.gov/current/title-40/chapter-I/subchapter-J/part-355/appendix-Appendix%20A%20to%20Part%20355
Master List of German Federal Environment Agency	Governmental Lists	https://www.umweltbundesamt.de/publikationen/karzinogene-mutagene-reproduktionstoxische-cmr
Massachusetts Toxics Use Reduction Act (TURA) Chemicals List	Governmental Lists	https://www.mass.gov/guides/massdep-toxics-use-reduction-program#-listed-chemicals-
California Proposition 65 List	Governmental Lists	https://www.p65warnings.ca.gov/chemicals
Stockholm Convention on Persistent Organic Pollutants	International Agreements	http://chm.pops.int/TheConvention/ThePOPs/ListingofPOPs/tabid/2509/Default.aspx
OSPAR List of chemicals of possible concern	International Agreements	https://www.ospar.org/work-areas/hasec/hazardous-substances/possible-concern
OSPAR List of chemicals for priority action	International Agreements	https://www.ospar.org/work-areas/hasec/hazardous-substances/priority-action
Trade Union Priority List for REACH Authorisation	NGO or Trade Union Lists	https://www.etui.org/publications/guides/trade-union-priority-list-for-reach-authorisation
ChemSec SIN List	NGO or Trade Union Lists	https://chemsec.org/business-tool/sin-list/
Substance Database according to SUBSPORTplus screening criteria	SUBSPORT	https://www.subsportplus.eu/subsportplus/EN/Substances/individual-substance-lists/31_SUBSPORT_SDSC.html

## Sheet: Table S3.2.1
Table S2-1: Authoritative list screening of potential alternatives to the substances of interest
	Substance name	CAS number	Subsportplus listing	Annex III Cosmetic Products Regulation	C&L notifications	CLH classification	Annex III of REACH	PACT	Comments
ALLURA RED	Malvidin chloride	643-84-5	NO	NO	No notifications submitted	Not classified	Suspected mutagen	NO
	Betanin	7659-95-2	NO	NO	No notifications submitted	Not classified	NA	NO
	Pigment Red 5	6410-41-9	EU Cosmetic Products Prohibited Substances (Annex II to CPR)	NO	No notifications submitted	Not classified	NA	NO	Substance listed in the Annex II of the cosmetic product regulation (Prohibited substances): 0% in hair dye products (https://echa.europa.eu/fr/substance-information/-/substanceinfo/100.026.461)
	Acid Red 41	5850-44-2	NO	NO	No notifications submitted	Not classified	Suspected persistent in the environment	NO
	Pigment Red 51	5850-87-3	NO	NO	No notifications submitted	Not classified	NA	NO
	Peonidin chloride	134-01-0	NO	NO	No notifications submitted	Not classified	Suspected mutagen	NO	Approved, but also considered to be a potential carcinogen under the CPR
	Pelargonidin chloride	134-04-3	NO	NO	No notifications submitted	Not classified	Suspected mutagen	NO	Approved, but also considered to be a potential carcinogen under the CPR
	Petunidin chloride	1429-30-7	NO	NO	No notifications submitted	Not classified	Suspected mutagen; Suspected respiratory sensitiser	NO	Approved, but also considered to be a potential carcinogen under the CPR
	Delphinidin chloride	528-53-0	NO	NO	No notifications submitted	Not classified	Suspected mutagen; Suspected respiratory sensitiser	NO	Approved, but also considered to be a potential carcinogen under the CPR
	Cyanidin chloride	528-58-5	NO	NO	No notifications submitted	Not classified	Suspected mutagen; Suspected respiratory sensitiser	NO	Approved, but also considered to be a potential carcinogen under the CPR
	Vat red 1	2379-74-0	EU Cosmetic Products Prohibited Substances (Annex II to CPR)	NO	H400: Aquatic Acute 1; H410: Aquatic Chronic; H317: Skin Sens. 1; H319: Eye Irrit. 2; H335 (inhalation) STOT SE 3	Not classified	NA	NO	Substance listed in the Annex II of the cosmetic product regulation (Prohibited substances): 0% in hair dye products (https://echa.europa.eu/fr/cosmetics-prohibited-substances/-/legislationlist/details/EU-COSM_PROD-ANX_II_PROHIB-100.017.422-VSK-0019DA)
	Acid Red 50	5873-16-5	NO	NO	No notifications submitted	Not classified	Suspected carcinogen; Suspected mutagen; Suspected persistent in the environment; Suspected toxic for reproduction	NO
	Alizarin	72-48-0	EU Cosmetic Products Prohibited Substances (Annex II to CPR); Trade Union Priority List; Dell Restricted Substances	NO	H302: Acute Tox. 4; H315, H319: Skin Irrit. 2, Eye Irrit. 2; H302, H319: Acute Tox. 4, Eye Irrit. 2; H317, H318, H410: Skin Sens. 1, Eye Dam. 1, Aquatic Chronic 1	Not classified	Suspected carcinogen; Suspected hazardous to the aquatic environment; Suspected mutagen; Suspected persistent in the environment; Suspected respiratory sensitiser; Suspected toxic for reproduction	NO	Substance listed in the Annex II of the cosmetic product regulation (Prohibited substances): 0% in hair dye products (https://echa.europa.eu/fr/cosmetics-prohibited-substances/-/legislationlist/details/EU-COSM_PROD-ANX_II_PROHIB-100.000.711-VSK-001C85)
	Pigment Red 3	2425-85-6	KEMI PRIO Phase-Out Substances; SDSC Substanve List according to Screening Criteria	NO	No notifications submitted	Not classified	NO	The substance is suspected to be CMR and PBT/vPvB (listed in CoRAP). The member state responsible for the evaluation concluded that more information from the registrants was necessary to reach a conclusion.
	Eosin	17372-87-1	EU Cosmetic Products Prohibited Substances (Annex II to CPR)	NO	H301, H311: Acute Tox. 1; H302, H312, H332: Acute Tox. 2; H314: Skin Corr. 1; H317: Skin Sens. 1; H318: Eye Dam. 1; H319: Eye Irrit. 2; H412: Aquatic Chronic 3	Not classified	Suspected carcinogen; Suspected mutagen; Suspected persistent in the environment; Suspected skin sensitiser	NO	Substance listed in the Annex II of the cosmetic product regulation (Prohibited substances): 0% in hair dye products (https://echa.europa.eu/fr/cosmetics-prohibited-substances/-/legislationlist/details/EU-COSM_PROD-ANX_II_PROHIB-100.037.629-VSK-0019A7) "A majority of data submitters agree this substance is Skin sensitising"
	AMARANTH	915-67-3	SDSC Prohibited Substance List according to Screening Criteria; EU Cosmetic Products Prohibited Substances (Annex II to CPR)	NO	H315: Skin Irrit. 2; H319: Eye Irrit. 2; H335: STOT SE 3; H412: Aquatic Chronic 3	Not classified	Suspected carcinogen; Suspected persistent in the environment:	NO	Substance listed in the Annex II of the cosmetic product regulation (Prohibited substances): 0% in hair dye products (https://echa.europa.eu/fr/cosmetics-prohibited-substances/-/legislationlist/details/EU-COSM_PROD-ANX_II_PROHIB-100.011.839-VSK-001D5F)
	Sudan III	85-86-9	SDSC Prohibited Substance List according to Screening Criteria; EU Cosmetic Products Prohibited Substances (Annex II to CPR); Global Automotive Declarable Substance List; Trade Union Priority List; Dell Restricted Substances; Bluesign System Substance List	NO	H315: Skin Irrit. 2; H317: Skin Sens. 1; H318; Eye Dam. 1; H319: Eye Irrit. 2; H335: STOT SE 3; H413: Aquatic Chronic 4	Not classified	Suspected carcinogen; Suspected hazardous to the aquatic environment; Suspected mutagen; Suspected persistent in the environment; Suspected skin sensitiser	NO	Substance listed in the Annex II of the cosmetic product regulation (Prohibited substances): 0% in hair dye products (https://echa.europa.eu/fr/cosmetics-prohibited-substances/-/legislationlist/details/EU-COSM_PROD-ANX_II_PROHIB-100.001.490-VSK-001D21)
	Acid Red 88	1658-56-6	NO	NO	H315: Skin Irrit. 2; H319: Eye Irrit. 2; H412: Aquatic Chronic 3	Not classified	Suspected carcinogen; Suspected hazardous to the aquatic environment; Suspected mutagen; Suspected persistent in the environment	NO
	Acid Red 92	18472-87-2	SC Johnson Green List	YES	H315: Skin Irrit. 2; H319: Eye Irrit. 2; H335: STOT SE 3; H373: STOT RE 2; H400: Aquatic Acute 1; H411: Aquatic Chronic 2; H412: Aquatic Chronic 3	Not classified	NO	NO	Substance listed in the Annex III of the cosmetic product regulation (Restricted substances): Hair dye substance in oxidative hair dye products - After mixing under oxidative conditions the maximum concentration applied to hair must not exceed 2.0 %. Warning label: To be printed on the label: The mixing ratio. ''Hair colourants can cause severe allergic reactions. Read and follow instructions. Th…
	Erythrosin B	16423-68-0	EU Cosmetic Products Prohibited Susbtances (Annex II to CPR)	NO	H302: Acute Tox. 2; H411: Aquatic Chronic 2; H412: Aquatic Chronic 3; H413: Aquatic Chronic 4	Not classified	NO	NO	Substance listed in the Annex II of the cosmetic product regulation (Prohibited substances): 0% in hair dye products (https://echa.europa.eu/fr/cosmetics-prohibited-substances/-/legislationlist/details/EU-COSM_PROD-ANX_II_PROHIB-100.036.779-VSK-00199F)
	Colcothar	1309-37-1	SDSC: Substance List according to Screening Criteria	NO	H302: Acute Tox. 4; H315: Skin Irrit. 2; H318: Eye Dam. 1; H319: Eye Irrit. 2; H332: Acute Tox. 4; H335: STOT SE 3; H370: STOT SE 3; H372: STOT RE 1; H373: STOT RE 2; H411: Aquatic Chronic 2	Not classified	NO	NO	Substance is known to be on the EEA market in nanomaterial form.
	2,7-Naphthalenedisulfonic acid	10236-37-0	NO	NO	No notifications submitted	Not classified	NO	NO	No information available on the ECHA website
	Acid Red 163	13421-53-9	NO	NO	No notifications submitted	Not classified	Suspected carcinogen; Suspected mutagen; Suspected persistent in the environment	NO
	Scarlet GN	3257-28-1	NO	NO	No notifications submitted	Not classified	Suspected mutagen; Suspected persistent in the environment; Suspected toxic for reproduction	NO	Under the CPR the susbtance is approved, but also considered a suspected carcinogen
	Pigment Red 48	3564-21-4	EU Cosmetic Products Prohibited Susbtances (Annex II to CPR)	NO	1 notification submitted but no classification	Not classified	Suspected carcinogen; Suspected mutagen; Suspected persistent in the environment	NO	Substance is known to be on the EEA market in nanomaterial form.
	Pigment Red 68	5850-80-6	NO	NO	No notifications submitted	Not classified	NO	NO
	Acid Red 180	6408-26-0	NO	NO	No notifications submitted	Not classified	NO	NO	Not registered under REACH. Only allowed in rinse-off cosmetic products under the CPR.
	Acid Red 98	6441-77-6	NO	NO	No notifications submitted	Not classified	Suspected carcinogen; Suspected mutagen; Suspected persistent in the environment; Suspected skin sensitiser; Suspected toxic for reproduction	NO
	Pigment Red 7	6471-51-8	NO	NO	No notifications submitted	Not classified	Suspected carcinogen; Suspected mutagen; Suspected persistent in the environment; Suspected skin sensitiser; Suspected toxic for reproduction	NO
	Solvent Red 3	6535-42-8	EU Cosmetic Products Prohibited Susbtances (Annex II to CPR)	NO	1 notification submitted but no classification	Not classified	Suspected carcinogen; Suspected hazardous to the aquatic environment; Suspected mutagen; Suspected persistent in the environment; Suspected toxic for reproduction	NO	Substance listed in the Annex II of the cosmetic product regulation (Prohibited substances): 0% in hair dye products (https://echa.europa.eu/cosmetics-prohibited-substances/-/legislationlist/details/EU-COSM_PROD-ANX_II_PROHIB-100.026.764-VSK-53C2E8)
	Pigment Red 49	1248-18-6	NO	NO	1 notification submitted but no classification	Not classified	Suspected carcinogen; Suspected persistent in the environment; Suspected skin sensitiser	NO	Approved, but also considered to be a potential carcinogen under the CPR
	Carminic acid	1260-17-9	NO	NO	H314: Skin Corr. 1B	Not classified	Suspected carcinogen; Suspected hazardous to the aquatic environment; Suspected mutagen; Suspected persistent in the environment; Suspected respiratory sensitiser; Suspected toxic for reproduction	NO
	Pigment Red 63:1	6417-83-0	EU Cosmetic Products Prohibited Susbtances (Annex II to CPR)	NO	H412: Aquatic Chronic 3	Not classified	NO	NO	Substance is known to be on the EEA market in nanomaterial form. Substance listed in the Annex II of the cosmetic product regulation (Prohibited substances): 0% in hair dye products (https://echa.europa.eu/cosmetics-prohibited-substances/-/legislationlist/details/EU-COSM_PROD-ANX_II_PROHIB-100.026.493-VSK-001B4B)
	Pigment Red 112	6535-46-2	EU Cosmetic Products Prohibited Susbtances (Annex II to CPR)	NO	H317: Skin Sens. 1; H341: Muta. 2; H412: Aquatic Chronic 3; H413: Aquatic Chronic 4	Not classified	NO	ECHA requested more information to registrant on the potential hazard properties of the substance (https://echa.europa.eu/pact?p_p_id=disspact_WAR_disspactportlet&p_p_lifecycle=0&_disspact_WAR_disspactportlet_substanceId=100.026.765&_disspact_WAR_disspactportlet_jspPage=%2FdetailsPage%2Fview_detailsPage.jsp)	Substance is known to be on the EEA market in nanomaterial form; Substance listed in the Annex II of the cosmetic product regulation (Prohibited substances): 0% in hair dye products (https://echa.europa.eu/cosmetics-prohibited-substances/-/legislationlist/details/EU-COSM_PROD-ANX_II_PROHIB-100.026.765-VSK-53C2E9)
	Pigment Red 122	980-26-7	NO	NO	No notifications submitted	Not classified	NO	ECHA requested more information to registrant on the potential hazard properties of the substance (https://echa.europa.eu/pact?p_p_id=disspact_WAR_disspactportlet&p_p_lifecycle=0&_disspact_WAR_disspactportlet_substanceId=100.012.329&_disspact_WAR_disspactportlet_jspPage=%2FdetailsPage%2Fview_detailsPage.jsp)	Substance is known to be on the EEA market in nanomaterial form. Only allowed in rinse-off products under the CPR
	Ponceau 4R	2611-82-7	NO	NO	H341: Muta. 2	Not classified	NO	NO	Substance is known to be on the EEA market in nanomaterial form. Substance listed in the Annex III of the cosmetic product regulation (Restricted substances): Hair dye substance in non-oxidative hair dye products - Maximum concentration of 0.5% (The free base and salts of this hair colouring ingredient, unless prohibited under Annex II, are permitted for use) Source:https://echa.europa.eu/cosmeti…
	D&C Red no.31	6371-76-2	EU Cosmetic Products Prohibited Susbtances (Annex II to CPR)	NO	H302: Acute Tox. 4	Not classified	Suspected carcinogen; Suspected mutagen; Suspected persistent in the environment	NO	Substance listed in the Annex II of the cosmetic product regulation (Prohibited substances): 0% in hair dye products (https://echa.europa.eu/cosmetics-prohibited-substances/-/legislationlist/details/EU-COSM_PROD-ANX_II_PROHIB-100.026.272-VSK-001B45)
	Acid Red 52	3520-42-1	NO	YES	H315: Skin Irrit. 2; H317: Skin Sens. 1; H319: Eye Irrit. 2; H335: STOT SE 3; H412: Aquatic Chronic 3	Not classified	Suspected carcinogen; Suspected mutagen; Suspected persistent in the environment	NO	Substance is known to be on the EEA market in nanomaterial form. Substance listed in the Annex III of the cosmetic product regulation (Restricted substances): Hair dye substance in non-oxidative hair dye products - Maximum concentration of 0.6% (The free base and salts of this hair colouring ingredient, unless prohibited under Annex II, are permitted for use) Hair dye substance in oxidative hair …
	Acid Red 33	3567-66-6	NO	YES	H319: Eye Irrit. 2; H335: STOT SE 3	Not classified	Suspected carcinogen; Suspected mutagen; Suspected persistent in the environment	NO	Substance listed in the Annex III of the cosmetic product regulation (Restricted substances): Hair dye substance in non-oxidative hair dye products - Maximum concentration of 0.5% (The free base and salts of this hair colouring ingredient, unless prohibited under Annex II, are permitted for use) Source: https://echa.europa.eu/cosmetics-restricted-substances/-/legislationlist/details/EU-COSM_PROD-…
	Carmoisine	3567-69-9	SDSC Scubatnce List according to Screening Criteria	NO	H315: Skin Irrit. 2; H319: Eye Irrit. 2; H335: STOT SE 3; H412: Aquatic Chronic 3	Not classified	Suspected mutagen; Suspected persistent in the environment	NO
	Acid Red 1	3734-67-6	Boots Restricted Substances	NO	H315: Skin Irrit. 2; H317: Skin Sens. 1B; H319: Eye Irrit. 2	Not classified	Suspected carcinogen; Suspected mutagen; Suspected persistent in the environment	NO
	Ponceau SX	4548-53-2	EU Cosmetic Products Prohibited Susbtances (Annex II to CPR)	NO	Notifications received but no classification	Not classified	Suspected carcinogen; Suspected mutagen; Suspected persistent in the environment; Suspected toxic for reproduction	NO	Substance listed in the Annex II of the cosmetic product regulation (Prohibited substances): 0% in hair dye products (https://echa.europa.eu/cosmetics-prohibited-substances/-/legislationlist/details/EU-COSM_PROD-ANX_II_PROHIB-100.022.646-VSK-001A5C)
	Pigment Red 57	5858-81-1	NO	YES	Notifications received but no classification	Not classified	Suspected carcinogen; Suspected mutagen; Suspected persistent in the environment; Suspected skin sensitiser; Suspected toxic for reproduction	NO	Substance listed in the Annex III of the cosmetic product regulation (Restricted substances): Hair dye substance in non-oxidative hair dye products - Maximum concentration of 0.4% Source: https://echa.europa.eu/cosmetics-restricted-substances/-/legislationlist/details/EU-COSM_PROD-ANX_III_RESTRIC-100.024.998-VSK-010326
	Pigment Red 4	2814-77-9	KEMI PRIO Phase-Out Substances; SDSC Substanve List according to Screening Criteria; EU Cosmetic Products Prohibited Substances (Annex II to CPR)	NO	H302: Acute Tox. 4; H315: Skin Irrit. 2; H319: Eye Irrit. 2; H413: Aquatic Chronic 4	Not classified	NO	Substance suspected to be CMR and PBT after susbtance evaluation (CoRAP) Substance currently under assessment to be classified as PBT.	Substance listed in the Annex II of the cosmetic product regulation (Prohibited substances): 0% in hair dye products (https://echa.europa.eu/cosmetics-prohibited-substances/-/legislationlist/details/EU-COSM_PROD-ANX_II_PROHIB-100.018.693-VSK-53C260)
	Trimanganese bis (orthophosphate)	10236-39-2	NO	NO	No notifications submitted	Not classified	NO	NO	No information available on ECHA website (inorganic substance)
	Acid Red 195	12220-24-5	NO	NO	No notifications submitted	Not classified	NO	NO	No information available on ECHA website; Structure not available
	Ponceau 4R, Cochineal Red A	2611-82-7	NO	NO	H341: Muta. 2	Not classified	NO
	Erythrosine	568-63-8	NO	NO	H411: Aquatic Chronic 2; H302: Acute Tox. 4; H413: Aquatic Chronic 4; H412: Aquatic Chronic 3		NO		No information available on ECHA website, registered under REACH
	Lycopene	502-65-8	NO	NO	?	?	NO
	Litholrubine BK	4/9/5281	NO	NO	No notifications submitted	Not classified	NO	ECHA concluded that the composition of the registered substance has not been provided to the required level of detail. In addition the registrant is required to scientifically assess potential effects of nanomaterial forms	Substance is known to be on the EEA market in nanomaterial form.
CLIMBAZOLE	Caprylylglycine	14246-53-8	NO	NO	H315: Eye Dam. 1; H318: Eye Irrit. 1; H319: Eye Irrit. 2; H335: STOT SE 3	Not classified	NO	Registration evaluated. No need for more information.
	Ciclopirox olamine	41621-49-2	NO	NO	H228: Flam. Sol. 2; H271: Ox. Sol. 1; H302: Acute Tox. 4; H314: Skin Corr. 1B; H315: Skin Irrit. 2; H317: Skin Sens. 1; H318: Eye Dam. 1; H319: Eye Irrit. 2; H332: Acute Tox. 4; H334: Resp. Sens. 1; H335: STOT SE 3; H373: STOT RE 2; H400: Aquatic Acute 1; H410: Aquatic Chronic 1	Not classified	NO	NO	A majority of data submitters agree this substance is Skin sensitising
	Ethyl lauroyl arginate hydrochloride	60372-77-2	NO	NO	H318: Eye Dam. 1; H400: Aquatic Acute 1; H412: Aquatic Chronic 3	H318: Eye Dam. 1; H400: Aquatic Acute 1	NO	NO	Substance listed in the Annex I of Seveso III Directive (Substances for which industrial accident prevention and reporting requirements have been established)
	Juniperus communis sprout extract	84603-69-0	NO	NO	No notifications received	Not classified	NO	NO	Substance not available in ECHA website
	Salicylic acid	69-72-7	KEMI PRIO Phase-Out Substances; Trade Union Priority List	YES	No notifications available	H302: Acute Tox. 4; H318: Eye Dam. 1:; H361d: Repr. 2	NO	The group "Salicylic acid, its salts and alkyl derivatives" is under assessment for regulatory needs. For salicylic acid /EC: 200-712-3), it is believed that the classification as Repro 2 in CLH will support regulatory actions under cosmetic product regulation	Substance listed in the Annex III of the cosmetic product regulation (Restricted substances): Rinse-off hair products - Maximum concentration of 3% Cosmetic products other than rinse-off hair products, except body lotion, eye shadow, mascara, eyeliner, lipstick and roll-on deodorant - Maximum concentration of 2% Body lotion, eye shadow, mascara, eyeliner, lipstick and roll-on deodorant - Maximum …
	Shikimic acid	138-59-0	NO	NO	H315: Skin Irrit. 2; H318: Eye Dam. 1; H319: Eye Irrit. 2	Not classified	NO	NO	Substance registered for uses as intermediate only
	Propanediol caprylate (Octanoic acid)	102731-54-4	NO	NO	H319: Eye Irrit. 2; H412: Aquatic Chronic 3	Not classified	NO	NO	Green alternative to Climbazole according to the producer Symrise. According to the classification provided by companies to ECHA in REACH registrations this substance causes serious eye irritation and is harmful to aquatic life with long lasting effects.
	ETHYL LAUROYL ARGINATE HCL	60372-77-2	NO	NO	No notifications available	H318: Eye Dam. 1; H410: Aquatic Acute 1	NO	NO
	HEXAMIDINE DIISETHIONATE	659-40-5	NO	NO	H302: Acute Tox. 4; H319: Eye Irrit. 2; H332: Aquatic Tox 2; H400: Aquatic Acute 1; H410: Aquatic Chronic 1; H411: Aquatic Chronic 2	Not classified	NO	NO
	PIROCTONE OLAMINE	68890-66-4	NO	NO	H315: Skin Irrit. 2; H317: Skin Sens. 1; H318: Eye Dam. 1; H332: Acute Tox. 4; H334: Resp. Sens. 1; H335: STOT SE 3; H400: Aquatic Acute 1; H410: Aquatic Chronic 1	Not classified	NO	NO	A majority of data submitters agree this substance is skin irritating and eye damaging
BENZOPHENONE 4	PABA	150-13-0	EU Cosmetic Products: Prohibited Substances	NO	H302: Acute Tox. 4; H315: Skin Irrit. 2; H317: Skin Sens. 1; H319: Eye Irrit. 2; H332: Acute Tox. 4; H335: STOT SE 3; H412: Aquatic Chronic 3; H413: Aquatic Chronic 4	Not classified	NO	NO	A majority of data submitters agree this substance is Skin sensitising. Substance listed in annex II of Cosmetic Products Regulation (Prohibited Substances): 0% in all cosmetics products
	4-(2-Oxo-3-bornylidenemethyl)phenyl trimethylammonium methylsulphate	52793-97-2	NA	NO	H315: Skin Irrit. 2; H319: Eye Irrit. 2; H411: Aquatic Chronic 2	Not classified	Suspected mutagen; Suspected persistent in the environment; Suspected skin sensitiser	NO	Substance listed in Annex VI of the Cosmetic Products Regulation (Allowed in UV filters), with a concentration limit of 6%
	Homosalate	118-56-9	NA	NO	H315: Skin Irrit. 2; H319: Eye Irrit. 2; H335: STOT SE 3; H413: Aquatic Chronic 4	Not classified	NO	Following an assessment by France of the potential for endocrine disruptor, respiratory sensitiser and skin sensitiser, the substance is under assessment for further regulatory needs. As of 12 December 2021, CLH proposed for reproductive toxicty and skin sensitisation. A restriction on use in scented articles is foreseen.	Substance listed in Annex VI of the Cosmetic Products Regulation (Allowed in UV filters), with a concentration limit of 10%
	Oxybenzone	131-57-7	ChemSec: SIN list; SDSC: Substance List according to Screening Criteria	NO	No notifications received	Not classified	NO	The substance is under assessment as endocrine disrupting compound	Substance listed in Annex VI of the Cosmetic Products Regulation (Allowed in UV filters), with a concentration limit of 6%. Not more than 0.5% if the purpose is to protect the product formulation. Warning label: "Contains benzophenone-3"
	Ensulizole	27503-81-7	NA	NO	H315: Skin Irrit. 2; H319: Eye Irrit. 2	Not classified	NO	NO	Substance listed in Annex VI of the Cosmetic Products Regulation (Allowed in UV filters), with a concentration limit of 8% expressed as acid
	Ecamsule	92761-26-7	NA	NO	H318: Eye Dam. 1	H318: Eye Dam. 1	NO	Registration dossier evaluated to classified substance under CLH	Substance listed in Annex VI of the Cosmetic Products Regulation (Allowed in UV filters), with a concentration limit of 10% expressed as acid
	Avobenzone	70356-09-1	KEMI: PRIO Phase-Out Substances; SDSC: Substance List according to Screening Criteria	NO	H400: Aquatic Acute 1; H410: Aquatic Chronic 1; H411: Aquatic Chronic 2; H412: Aquatic Chronic 3; H413: Aquatic Chronic 4	Not classified	NO	Substance under assessment as PBT	Substance listed in Annex VI of the Cosmetic Products Regulation (Allowed in UV filters), with a concentration limit of 5%
	Benzylidene Camphor Sulfonic Acid	56039-58-8	NA	NO	H315: Skin Irrit. 2; H319: Eye Irrit. 2; H335: STOT SE 3	Not classified	NO	NO	Substance listed in Annex VI of the Cosmetic Products Regulation (Allowed in UV filters), with a concentration limit of 6% as acid
	Octocrilene	6197-30-4	KEMI: PRIO Phase-Out Substances; SDSC: Substance List according to Screening Criteria	NO	H410: Aquatic Chronic 1; H413: Aquatic Chronic 4; H412: Aquatic chronic 3	Not classified	NO	Substance under assessment as PBT	Substance listed in Annex VI of the Cosmetic Products Regulation (Allowed in UV filters), with a concentration limit of 10% as acid
	Polyacrylamidomethylbenzylidene camphor	113783-61-2	NA	NO	No notifications received	Not classified	NO	NO	Substance is a polymer, hence is not covered by the REACH regulation. Substance listed in Annex VI of the Cosmetic Products Regulation (Allowed in UV filters), with a concentration limit of 6%
	Octinoxate	5466-77-3	Trade Union Priority List; ChemSec: SIN list; SDSC: Substance List according to Screening Criteria	NO	No notifications received	Not classified	NO	NO	No information available on ECHA website. Substance listed in Annex VI of the Cosmetic Products Regulation (Allowed in UV filters), with a concentration limit of 10%
	PEG-25 PABA	116242-27-4	NA	NO	No notifications received	Not classified	NO	NO	No information available on ECHA website. Substance listed in Annex VI of the Cosmetic Products Regulation (Allowed in UV filters), with a concentration limit of 10%
	Amiloxate	71617-10-2	NA	NO	H410: Aquatic Chronic 1; H400: Aquatic Acute 1; H412: Aquatic Chronic 3	Not classified	NO	Substance under assessment as endocrine disrupting	Substance listed in Annex VI of the Cosmetic Products Regulation (Allowed in UV filters), with a concentration limit of 10%
	Ethylhexyl triazone	88122-99-0	NA	NO	H413: Aquatic Chronic 4	Not classified	NO	Germany submitted an intention to classified the subsatance H413 (Aquatic Chronic 4) under CLH, but RAC concluded that the entry should be removed	Substance listed in Annex VI of the Cosmetic Products Regulation (Allowed in UV filters), with a concentration limit of 5%
	Drometrizole trisiloxane	155633-54-8	NA	NO	1 notification received but no classification	Not classified	NO	NO	No information available on ECHA website.
	Iscotrizinol	154702-15-5	KEMI: PRIO Phase-Out Substances; SDSC: Substance List according to Screening Criteria	NO	H412: Aquatic Chronic 3; H413: Aquatic Chronic 4	Not classified	NO	Substance under assessment as PBT	Substance listed in Annex VI of the Cosmetic Products Regulation (Allowed in UV filters), with a concentration limit of 4%
	Enzacamene	36861-47-9	ChemSec: SIN list; Vestas Blacklist; EU REACH: Candidate List; KEMI: PRIO Phase-Out Substances; SDSC: Substance List according to Screening Criteria	NO	H315: Skin Irrit. 2; H319: Eye Irrit. 2; H361: Repr. 2; H400: Aquatic Acute 1; H410: Aquatic Chronic 1	Not classified	Suspected bioaccumulative; Suspected hazardous to the aquatic environment; Suspected mutagen; Suspected persistent in the environment; Suspected skin sensitiser; Suspected toxic for reproduction	Substance under assessment as endocrine disrupting	Substance listed in Annex VI of the Cosmetic Products Regulation (Allowed in UV filters), with a concentration limit of 4%
	Benzylidene camphor	15087-24-8	SDSC: Substance List according to Screening Criteria; EU Cosmetic Products: Prohibited Substances; EU REACH: Candidate List; KEMI: PRIO Phase-Out Substances; ChemSec: SIN list	NO	H361: Repr. 2	Substance identified as endocrine disruptor	Suspected hazardous to the aquatic environment; Suspected mutagen; Suspected persistent in the environment; Suspected skin sensitiser; Suspected toxic for reproduction	Substance identified as endocrine disruptor and as SVHC	According to the classification provided by companies to ECHA in CLP notifications this substance is suspected of damaging fertility or the unborn child. Substance listed in the Annex II of the Cosmetic Products Regualtion (Prohibited substances)
	Octisalate	118-60-5	NA	NO	H315: Skin Irrit. 2; H319: Eye Irrit. 2; H410: Aquatic Chronic 1; H413: Aquatic Chronic 4	Not classified	No	Assessment as endocrine disruptor foreseen in 2022 (to be submitted by Germany). Substance is also under assessment for further regulatory needs. As of 12 December 2021, CLH proposed for reproductive toxicty and skin sensitisation. A restriction on use in scented articles is foreseen.	Substance listed in Annex VI of the Cosmetic Products Regulation (Allowed in UV filters), with a concentration limit of 5%
	Padimate O	21245-02-3	NA	NO	H315: Skin Irrit. 2; H319: Eye Irrit. 2; H335: STOT SE 3; H360: Repr. 1B	Not classified	Suspected carcinogen; Suspected hazardous to the aquatic environment; Suspected persistent in the environment; Suspected skin sensitiser	NO	Some data submitters indicate they consider this substance as Toxic to Reproduction Substance listed in Annex VI of the Cosmetic Products Regulation (Allowed in UV filters), with a concentration limit of 8%
	Bisoctrizole	103597-45-1	KEMI: PRIO Phase-Out Substances; ChemSec: SIN list	NO	H413: Aquatic Chronic 4	H413: Aquatic Chronic 4	NO	NO	Substance is known to be on the EEA market in nanomaterial form. Substance listed in Annex VI of the Cosmetic Products Regulation (Allowed in UV filters), with a concentration limit of 10%. Not to be used in applications that may lead to exposure of the end-user's lungs by inhalation. Only nanomaterials having the following characteristics are allowed: - Purity = 98.5 %, with 2,2'-methylene-bis-(…
	Bisdisulizole disodium	180898-37-7	NA	NO	2 notifications received but no classification	Not classified	NO	NO
	Bemotrizinol	187393-00-6	NA	NO	125 notifications received but no classification	Not classified	NO	Registration dossier evaluated.	Substance listed in Annex VI of the Cosmetic Products Regulation (Allowed in UV filters), with a concentration limit of 10%
	PARSOL SLX	207574-74-1	NA	NO	H330: Acute Tox. 2; H413: Aquatic Chronic 4	Not classified	NO	NO	According to the classification provided by companies to ECHA in CLP notifications this substance is fatal if inhaled and may cause long lasting harmful effects to aquatic life. Substance listed in Annex VI of the Cosmetic Products Regulation (Allowed in UV filters), with a concentration limit of 10%
	Uvinul A Plus	302776-68-7	NA	NO	H413: Aquatic Chronic 4	H410: Aquatic Chronic 1 (RAC opinion adopted)	NO	RAC opinion adopted for classification of the substance as toxic for the aquatic environment under CLH
	Titanium dioxide	13463-67-7	KEMI: PRIO Phase-Out Substances; Trade Union Priority List	YES	H302: Acute Tox. 4; H312: Acute Tox. 4; H315: Skin Irrit. 2; H319: Eye Irrit. 2; H320: Eye Irrit. 2; H332: Acute Tox. 4; H334: Resp. Sens. 1B; H335: STOT SE 3; H336: STOT SE 3; H341: Muta. 2; H350 Carc. 1B; H351: Carc. 2; H371: STOT SE 2; H372: STOT RE 1; H413: Aquatic Chronic 4	H351: Carc. 2		Registration dossier evaluated to classified substance under CLH carcinogenic (category 2)	According to the harmonised classification and labelling (ATP14) approved by the European Union, this substance is suspected of causing cancer. Substance is known to be on the EEA market in nanomaterial form. Substance lkisted in the Annex III of the Cosmetics Products Regulation (restricted substances): - Professional use hair aerosol spray products: concentration limit of 1.1%, Only in the pigm…
	Lisadimate	136-44-7	NA	NO	No notifications received	Not classified	Suspected carcinogen; Suspected hazardous to the aquatic environment; Suspected mutagen	NO	Substance not included in the allowed UV filters under the cosmetic products regulation
	Cinoxate	104-28-9	NA	NO	No notifications received	Not classified	Suspected hazardous to the aquatic environment; Suspected persistent in the environment; Suspected skin sensitiser	NO	Substance not included in the allowed UV filters under the cosmetic products regulation
	Witisol	7420-86-2	NA	NO	No notifications received	Not classified	Suspected hazardous to the aquatic environment; Suspected persistent in the environment; Suspected toxic for reproduction	NO	Substance not included in the allowed UV filters under the cosmetic products regulation
	Lawsone	83-72-7	NA	NO	H302: Acute Tox. 4; H315: Skin Irrit. 2; H319: Eye Irrit. 2; H335: STOT SE 3; H341: Muta. 2; H411: Aquatic Chronic 2	Not classified	Suspected hazardous to the aquatic environment; Suspected mutagen; Suspected persistent in the environment	NO	Substance not included in the allowed UV filters under the cosmetic products regulation
	Bornelone	2226-11-1	NA	NO	No notifications received	Not classified	NO	NO	Substance not included in the allowed UV filters under the cosmetic products regulation
	Octyl dimethyl 4-aminobenzoic acid	58817-05-3	NA	NO	No notifications received	Not classified	NO	NO	Substance not included in the allowed UV filters under the cosmetic products regulation. Substance is not found in the ECHA database
	Eusolex-8020	63250-25-9	NA	NO	No notifications received	Not classified	NO	NO	Substance not included in the allowed UV filters under the cosmetic products regulation
	Scytonemin	152075-98-4	NA	NO	No notifications received	Not classified	NO	NO	Substance not included in the allowed UV filters under the cosmetic products regulation. Substance is not found in the ECHA database.
	Avobenzone, ensulizole, enzacamene drug combination	156586-95-7	NA	NO	No notifications received	Not classified	NO	NO	Substance not included in the allowed UV filters under the cosmetic products regulation. Substance is not found in the ECHA database.
	2-ethylhexyl 4-[methyl(nitroso)amino]benzoate	122021-01-6	NA	NO	No notifications received	Not classified	NO	NO	Substance not included in the allowed UV filters under the cosmetic products regulation. Substance is not found in the ECHA database.
	Padimate	21245-01-2	NA	NO	H226: Flam. Liq. 3; H302: Acute Tox. 2; H312: Acute Tox. 4; H315: Skin Irrit. 2; H319: Eye Irrit. 2; H332: Acute Tox. 4; H335: STOT SE 3	Not classified		NO	According to the classification provided by companies to ECHA in CLP notifications this substance causes serious eye irritation, causes skin irritation and may cause respiratory irritation. Substance not included in the allowed UV filters under the cosmetic products regulation
	Padimate A	14779-78-3	EU Cosmetic Products: Prohibited Substances	NO	No notifications received	Not classified	Suspected carcinogen; Suspected hazardous to the aquatic environment; Suspected mutagen	NO	Substance listed in the Annex II of the Cosmetic Products Regulation (Prohibited substances)
	METHOXYPROPYLAMINO	1419401-88-9	NA	NO	H402: Aquatic Acute 3; H412: Aquatic chronic 3	Not classified	NO	NO	Cosmetic Products Regulation, Annex VI - Allowed UV Filters
	PHENYLENEBIS-DIPHENYLTRIAZINE	55514-22-2	NA	NO	No notifications received	Not classified	NO	NO	Cosmetic Products Regulation, Annex VI - Allowed UV Filters; acute toxic fatal if inhaled
	TRIS-BIPHENYLTRIAZINE/ TRIS-BIPHENYLTRIAZINE(NANO)	31274-51-8	NA	NO	H413: Aquatic Chronic 4	Not classified	NO	NO	Substance is known to be on the EEA market in nanomaterial form. Cosmetic Products Regulation, Annex VI - Allowed UV Filters
	CAMPHORBENZALKONIUM METHOSULFATE	258-190-8	NA	NO	H411: Aquatic Chronic 2; H315: Skin Irrit. 2; H319: Eye Irrit. 2	Not classified	Substances predicted as likely to meet criteria for category 1A or 1B carcinogenicity, mutagenicity, or reproductive toxicity, or with dispersive or diffuse use(s) where predicted likely to meet any classification criterion for health or environmental hazards, or where there is a nanoform soluble in biological and environmental media.	NO

## Sheet: Table S3.2.2
Table S2-2: List of shorlisted potential alternatives for further assessment
	Substance name	CAS number	Molecular structure	SMILES	Molecular weight (g/mol)	Physical state (at 20 Celsius and 1013 hPa)	Boiling point (Celsius degrees)	Melting point point (Celsius degrees)	Vapour pressure (Pa at 25 Celsius)	Water solubility (mg/L at 25 Celsius)	Henry's law constant (at 20 Celcius)	log(Kow) at 25 Celsius	log(Koc) at 25 Celsius	Comments	Source
ALLURA RED	Allura Red	25956-17-6		CC1=CC(=C(C=C1S(=O)(=O)[O-])OC)N=NC2=C(C=CC3=C2C=CC(=C3)S(=O)(=O)[O-])O.[Na+].[Na+]	496.4	Solid: particulate/powder	310	245.3	1.67e-21	53878		-1.283	1.274		Molecular weight: PubChem. Other endpoints from the ECHA dossier: https://echa.europa.eu/fr/registration-dossier/-/registered-dossier/12184/5/5/2
	Malvidin chloride	643-84-5		COC1=CC(=CC(=C1O)OC)C2=[O+]C3=CC(=CC(=C3C=C2O)O)O.[Cl-]	366.7		514	219	5.47e-13	5.04	3.991e-16	2.33	2.232	No data available in eChem and PubChem. Substance is obtained from the extraction of vegetables and edible fruits (EFSA). QSARs cannot be used on full structure. Fragment used for predictions: COC1=CC(=CC(=C1O)OC)C2=[O]C3=CC(=CC(=C3C=C2O)O)O	Molecular weight: PubChem. Other endpoints from the QSAR predictions
	Beetroot red (betanin)	7659-95-2		C1C(N=C(C=C1C=CN2C(CC3=CC(=C(C=C32)O)OC4C(C(C(C(O4)CO)O)O)O)C(=O)O)C(=O)O)C(=O)O	550.48		868.13	349.84	8.73e-26	5391	4.77E-34 (bond method)	-0.95	-1.126	Beetroot red (E 162) is obtained from the roots of strains of red beets (Beta vulgaris L. var. ruba) by pressing crushed beet as pressed juice or by aqueous extraction of shredded beetroots and subsequent enrichment in the active principle.	Molecular weight: PubChem. Other endpoints from the EFSA Scientific Opinion: https://efsa.onlinelibrary.wiley.com/doi/epdf/10.2903/j.efsa.2015.4318
	Pigment Red 51	5850-87-3		CC1=C(C=CC(=C1)N=NC2=C(C=CC3=CC=CC=C32)O)S(=O)(=O)[O-].CC1=C(C=CC(=C1)N=NC2=C(C=CC3=CC=CC=C32)O)S(=O)(=O)[O-].[Ba+2]	820.05		552	236	2.38e-14	32.56	7.7e-17	2.9	3.127	QSARs cannot be used on full structure. Fragment used for calculations: CC1=C(C=CC(=C1)N=NC2=C(C=CC3=CC=CC=C32)O)S(=O)(=O)[O-]	Molecular Weight: PubChem. Other endpoints: QSAR
	Pigment Red 68	5850-80-6		C1=CC=C2C(=C1)C=CC(=C2N=NC3=C(C=C(C(=C3)C(=O)O)Cl)S(=O)(=O)[O-])[O-].C1=CC=C2C(=C1)C=CC(=C2N=NC3=C(C=C(C(=C3)C(=O)O)Cl)S(=O)(=O)[O-])[O-].[Na+].[Na+].[Ca+2]	895.6					26.87	1,04E-21 (bond method)	2.53	2.841	QSARs cannot be used on complete structure, hence calculations performed with C1=CC=C2C(=C1)C=CC(=C2N=NC3=C(C=C(C(=C3)C(=O)O)Cl)S(=O)(=O)[O-])[O-]	Molecular weight: PubChem. Other endpoints: QSAR
	Acid Red 180	6408-26-0		[H+].CC1=CC(=CC(=C1[O-])N=NC2=C([N-]N(C2=O)C3=CC=CC=C3)C)Cl.CC1=CC(=CC(=C1[O-])N=NC2=C([N-]N(C2=O)C3=CC=CC=C3)C)Cl.[Na+].[Na+].[Cr+3]	342.79		521	222	7.24e-12	4.403	8.54e-16	3.91	3.639	QSARs cannot be used on full structure. Fragment used for calculations: CC1=CC(=CC(=C1[O])N=NC2=C([N]N(C2=O)C3=CC=CC=C3)C)Cl	QSARs
	Pigment Red 122	980-26-7		CC1=CC2=C(C=C1)NC3=CC4=C(C=C3C2=O)NC5=C(C4=O)C=C(C=C5)C	340.4	Solid	Not relevant	>450	Study does not need to be conducted	<0,1		2.2	2.639	LogKoc is predicted using EpiSuite, experimental study was not feasible due to low solubility. All other endpoints are from the ECHA dossier	https://echa.europa.eu/nl/registration-dossier/-/registered-dossier/15097/5/5/2
CLIMBAZOLE	Climbazole	38083-17-9		CC(C)(C)C(=O)C(N1C=CN=C1)OC2=CC=C(C=C2)Cl	292.76	Solid	Decomposes at 260 C	96.6	<9.6x10	58	0.000285	3.89	3.74		Molecular wieght: PubChem. Other endpoints: https://echa.europa.eu/nl/registration-dossier/-/registered-dossier/11657/4/1
	Octanoic acid	102731-54-4		CCCCCCCC(=O)OCCCO	202.29	Liquid	284,3 - 301,1	-23.5	0,071 (at 20 Celcius)	808 ± 32 (at 20 Celcius)	0.018	3,33 (40 Celcius)	2.14		Molecular wieght: PubChem. LogKoc: EpiSuite. All other endpoints form the ECHA dossier
	Caprylylglycine	14246-53-8		CCCCCCCC(=O)NCC(=O)O	201.26	Solid	>= 350 - <= 450	111	0	1557 (at 20 Celcius)	2.03E-008 (Group method) atm-m3/mole	2,052 (22 Celcius)	< 1,25		Molecular wieght: PubChem. Henry's law constant: Episuite. The rest comes from the ECHA dossier
	Shikimic acid	138-59-0		C1C(C(C(C=C1C(=O)O)O)O)O	174.15	Solid	Study not necessary	183	0	267 (at 29,6 Celcius)	2.69E-014 (Bond methods) atm-m3/mole	-1,5 (21 Celcius)	-0.21		Molecular wieght: PubChem. LogKoc and Henry's law constant: EpiSuite. The rest from the ECHA dossier
	Ciclopirox olamine	41621-49-2		CC1=CC(=O)N(C(=C1)C2CCCCC2)O.C(CO)N	268.35	Solid	Decomposes before boiling. Decomposition temp >= 168 C	> 135 - < 143	<0,00014	31300		0.52	2.76		Molecular weight: PubChem. Other endpoints form EpiSuite
	Hexamidine Diisethionate	659-40-5		C1=CC(=CC=C1C(=N)N)OCCCCCCOC2=CC=C(C=C2)C(=N)N.C(CS(=O)(=O)O)O.C(CS(=O)(=O)O)O	606.7	Solid	Decomposes before boiling	217	<0 Pa (at 20C)	48.2		4.47	1.71		Molecular wieght: PubChem. Other endpoints from the ECHA dossier
BENZOPHENONE 4	Benzophenone-4	4065-45-6		COC1=C(C=C(C(=C1)O)C(=O)C2=CC=CC=C2)S(=O)(=O)O	303.31	Solid	178.3	119.1	1.79e-09	300.92		0.515	0,992		Molecular weight: PubChem. Other endpoints from the ECHA dossier: https://echa.europa.eu/fr/registration-dossier/-/registered-dossier/10063
	Ensulizole	27503-81-7		C1=CC=C(C=C1)C2=NC3=C(N2)C=C(C=C3)S(=O)(=O)O	274,3	Solid	Not necessary as substance is solid which melts above 300°C	300	Not necessary as substance is solid which melts above 300°C	109	1.33e-09	-1,42	2,5		Molecular weight: PubChem. Other endpoint: https://echa.europa.eu/registration-dossier/-/registered-dossier/5464/5/5/1
	Benzylidene Camphor Sulfonic Acid	56039-58-8		CC1(C2CCC1(C(=O)C2=CC3=CC=C(C=C3)S(=O)(=O)O)C)C	320,4		472.01	199.52	1.91e-11	119.5	9.11e-13	2.22			Molecular weight: PubChem. LogKow: KOWWIN v1.69 estimate
	Bisdisulizole disodium	180898-37-7		C1=CC(=CC=C1C2=NC3=C(N2)C=C(C=C3S(=O)(=O)[O-])S(=O)(=O)O)C4=NC5=C(N4)C=C(C=C5S(=O)(=O)[O-])S(=O)(=O)O.[Na+].[Na+]	674,6	Solid	Not necessary as substance is solid which melts above 300°C	360	2,1E-6	2000 (at 20°C)	4,72E-05	-2,4 (at 23°C)	0,17		Molecular weight: PubChem. Other endpoint: https://echa.europa.eu/registration-dossier/-/registered-dossier/8569/5/5/2
	Bemotrizinol	187393-00-6		CCCCC(CC)COC1=CC(=C(C=C1)C2=NC(=NC(=N2)C3=CC=C(C=C3)OC)C4=C(C=C(C=C4)OCC(CC)CCCC)O)O	627,8	Solid	>400	80,4	5,9E-22	<0,014	NA	>5,7 (at 20°C)	6,8 (at 20°C)	Henry's Law constant not provided by the registrant	Molecular weight: PubChem. Other endpoint: https://echa.europa.eu/registration-dossier/-/registered-dossier/12265/4/8
	Bornelone	2226-11-1		CC(=O)C=CC=C1C2CCC(C2)C1(C)C	204,31					9.627	8.62e-05	4.26			Molecular weight: PubChem. LogKow: KOWWIN v1.69 estimate
	Phenylemenis-Diphenyltriazine	55514-22-2		C1=CC=C(C=C1)C2=C(N=NC(=N2)C3=CC=C(C=C3)C4=NC(=C(N=N4)C5=CC=CC=C5)C6=CC=CC=C6)C7=CC=CC=C7	540.6	Solid	Not necessary as substance is solid which melts above 300°C	321	NA	< 0.02 µg/l		10.5		Log Kow has been found to be around 10.5 by HPLC method. However, this value has been obtained by extrapolation, that leads to a high uncertainty, the only certain value being > 8.5	Molecular weight: PubChem. Other endpoints from the ECHA dossier: https://echa.europa.eu/nl/registration-dossier/-/registered-dossier/6106/1/1
