# Supplementary material for: Managing PMT/vPvM substances in consumer products through the concepts of essential-use and functional substitution: a case-study for cosmetics
Source: Royal Society of Chemistry journal article supplement (doi:10.1039/d3em00025g), 2023-01-01
Supplement: d3em00025g4.xlsx [file d3em00025g4.xlsx]

## Sheet: Sheet1
Supplementary information to
Managing PMT/vPvM Substances in Consumer Products through the Concepts of Essential Use and Functional Substitution: a Case-Study for Cosmetics
Joanke van Dijk1, 2, Romain Figuiere3*, Stefan C. Dekker1, Annemarie P. van Wezel2, Ian Cousins3
*: Corresponding author: Romain Figuière (romain.figuiere@aces.su.se)
1 Copernicus Institute of Sustainable Development, Utrecht University, 3584 CB Utrecht, the Netherlands; 2 Institute for Biodiversity and Ecosystem Dynamics, University of Amsterdam, PO Box 94240, 1090 GE Amsterdam, the Netherlands; 3 Department of Environmental Science, Stockholm University, SE-10691 Stockholm, Sweden.
This SI document shows the table S4.1. All the information concerning these tables are provided in the main supplementary information file (SI 1)
Table S4.1: Overview of the hazard data collected

## Sheet: Table S4.1
Table S4.1: Overview of the hazard data collected
Source:
ECHA	https://echa.europa.eu/nl/information-on-chemicals/registered-substances
EFSA	https://www.efsa.europa.eu/en
QSAR	The value provided is a prediction from QSAR models. The number in brackets represent the number of QSAR models available for which the substance is within the applicability domain. For classification endpoint (e.g. carcinogenicity), the number indicated is the result of the ratio of the number of models which predicted a negative outcome over the number of model for which the substance is in the…
Iwao et al. (1997)	Iwao, H., Katsumasa, F., & Nagaki, M. (1977). Carcinogenicity test of shikimic acid in rats. Toxicology Letters, 1(1), 9-10.
Gupta & Skinner (2003)	Gupta, A. K., & Skinner, A. R. (2003). Ciclopirox for the treatment of superficial fungal infections: a review. International journal of dermatology, 42(S1), 3-9.
				Allura Red 25956-17-6	Malvidin chloride 643-84-5	Beetroot red (betanin) 7659-95-2	Pigment Red 51 5850-87-3	Pigment Red 68 5850-80-6	Acid Red 180 6408-26-0	Pigment Red 122 980-26-7	Climbazole 38083-17-9	Octanoic acid 102731-54-4	Caprylylglycine 14246-53-8	Shikimic acid 138-59-0	Ciclopirox olamine 41621-49-2	Hexamidine Diisethionate 659-40-5	Benzophenone-4 4065-45-6	Ensulizole 27503-81-7	Benzylidene Camphor Sulfonic Acid 56039-58-8	Bisdisulizole disodium 180898-37-7	Bemotrizinol 187393-00-6	Bornelone 2226-11-1	Phenylemenis-Diphenyltriazine 55514-22-2
	PERSISTENCY	Half-life sediment	Days	541.667	337.5	75	337.5	541.667	541.667	541.667	541.667	2.0708e-302	2.0708e-302	2.0708e-302	2.0708e-302	2.07e-302	341.667	135	541.667	337.5	541.667	337.5	Data gap
			Source	QSAR (1)	QSAR (1)	QSAR (1)	QSAR (1)	QSAR (1)	QSAR (1)	QSAR (1)	QSAR (1)	QSAR (1)	QSAR (1)	QSAR (1)	QSAR (1)	QSAR (1)	QSAR (1)	QSAR (1)	QSAR (1)	QSAR (1)	QSAR (1)	QSAR (1)
		Half-life soil	Days	120	75	17.3333	75	120	120	120	120	4.625e-303	4.625e-303	4.625e-303	4.625e-303	4.625e-303	75	30	120	75	120	75	Data gap
			Source	QSAR (1)	QSAR (1)	QSAR (1)	QSAR (1)	QSAR (1)	QSAR (1)	QSAR (1)	QSAR (1)	QSAR (1)	QSAR (1)	QSAR (1)	QSAR (1)	QSAR (1)	QSAR (1)	QSAR (1)	QSAR (1)	QSAR (1)	QSAR (1)	QSAR (1)
		Half-life water	Days	60	37.5	8.66667	37.5	60	60	60	60	2.3042e-303	2.3042e-303	2.3042e-303	2.3042e-303	2.3042e-303	37.5	15	60	37.5	60	37.5	Data gap
			Source	QSAR (1)	QSAR (1)	QSAR (1)	QSAR (1)	QSAR (1)	QSAR (1)	QSAR (1)	QSAR (1)	QSAR (1)	QSAR (1)	QSAR (1)	QSAR (1)	QSAR (1)	QSAR (1)	QSAR (1)	QSAR (1)	QSAR (1)	QSAR (1)	QSAR (1)
		Half-life air	Days	1.45833	0.0249583	0.0113333	0.595833	0.5875	0.10625	0.0533333	0.202917	0.725	0.541667	0.0820833	0.0267917	1.03	0.143333	0.883333	0.0504167	1.60833	0.0433333	0.0345833	Data gap
			Source	QSAR (1)	QSAR (1)	QSAR (1)	QSAR (1)	QSAR (1)	QSAR (1)	QSAR (1)	QSAR (1)	QSAR (1)	QSAR (1)	QSAR (1)	QSAR (1)	QSAR (1)	QSAR (1)	QSAR (1)	QSAR (1)	QSAR (1)	QSAR (1)	QSAR (1)
		Anaerobic degradation	Biowin 7 outcome	-0.78	1.16	0.78	-0.69	-0.36	-0.39	-2.01	-1.19	0.98	0.24	1.35	0.05	0.80	-0.20	-0.09	-1.50	-1.43	-0.61	-0.63	-0.58
			Source	QSAR (1)	QSAR (1)	QSAR (1)	QSAR (1)	QSAR (1)	QSAR (1)	QSAR (1)	QSAR (1)	QSAR (1)	QSAR (1)	QSAR (1)	QSAR (1)	QSAR (1)	QSAR (1)	QSAR (1)	QSAR (1)	QSAR (1)	QSAR (1)	QSAR (1)	QSAR (1)
		Ready Biodegradibility potential	Conclusion	Not readily biodegradable	Not readily biodegradable	Ready biodegradable	Not readily biodegradable	Not readily biodegradable	Not readily biodegradable	Not readily biodegradable	Not readily biodegradable	Readily biodegradable	Readily biodegradable	Readily biodegradable	Not readily biodegradable	Not readily biodegradable	Readily biodegradable	Not readily biodegradable	Not readily biodegradable	Not readily biodegradable	Not readily biodegradable	Not readily biodegradable	Not readily biodegradable
			Source	QSAR (2)	QSAR (1)	QSAR (1)	QSAR (2)	QSAR (2)	QSAR (1)	ECHA	ECHA	ECHA	ECHA	ECHA	QSAR (1)	ECHA	ECHA	ECHA	QSAR (2)	ECHA	ECHA	QSAR (1)	ECHA
	BIOACCUMULATION POTENTIAL	Octanol-water partition coefficient	LogKow	-1.28	1.74	-2.95	2.84	2.53	3.91	2.2	3.83	3.33	2.05	-1.5	0.52	4.47	0.52	-1.42	2.22	-2.4	>5.7	4.26	10.5
			Source	ECHA	QSAR (1)	QSAR (1)	QSAR (2)	QSAR (1)	QSAR (1)	ECHA	ECHA	ECHA	ECHA	ECHA	ECHA	ECHA	ECHA	ECHA	ECHA	ECHA	ECHA	ECHA	ECHA
		Bioconcentration factor	log(BCF)	0.74	0.94	-0.52	1.4	1.13	2.12	1.01	2.44	1.41	1	-0.22	1.6	0.75	0.14	-0.09	1.05	-0.38	0.19	2.95	3.76
			Source	QSAR (8)	QSAR (6)	QSAR (6)	QSAR (8)	QSAR (8)	QSAR (7)	QSAR (7)	QSAR (7)	QSAR (6)	QSAR (8)	QSAR (8)	QSAR (6)	QSAR (7)	QSAR (7)	QSAR (6)	QSAR (6)	QSAR (6)	ECHA	QSAR (6)	QSAR (6)
	MOBILITY	Octanol-organic carbon partition coefficient	LogKoc	1.27	2.845	0.315	3.455	2.495	3.855	3.23	3.74	2.14	<1.25	-0.205	2.755	1.7075	0.99	1.975	2.535	3.788	8.195	3.305	7.115
			Source	ECHA	QSAR (2)	QSAR (2)	QSAR (2)	QSAR (2)	QSAR (2)	QSAR (2)	ECHA	QSAR (3)	ECHA	QSAR (2)	QSAR (2)	QSAR (2)	ECHA	QSAR (2)	QSAR (2)	QSAR (2)	QSAR (2)	QSAR (2)	QSAR (2)
	TOXICITY TO HUMAN HEALTH	Carcinogenicity	Conclusion	Negative	0.34	Data gap	0	0.57	0.5	0.5	0.93	1	0.95	Negative	Negative	0.805	0.93	0.94	1	1	Negative	0.74	0.75
			Source	EFSA	QSAR (3)		QSAR (3)	QSAR (14)	QSAR (12)	QSAR (4)	QSAR (14)	QSAR (3)	QSAR (20)	Iwao et al. (1997)	Gupta & Skinner (2003)	QSAR (17)	QSAR (14)	QSAR (17)	QSAR (1)	QSAR (16)	ECHA	QSAR (19)	QSAR (12)
		Mutagenicity	Conclusion	Negative	Negative	1	1	0.78	0	Negative	Negative	Negative	Negative	Negative	Negative	Negative	Negative	Negative	1	Negative	Negative	0.95	Negative
			Source	ECHA	EFSA	QSAR (1)	QSAR (4)	QSAR (45)	QSAR (5)	ECHA	ECHA	ECHA	ECHA	ECHA	ECHA	ECHA	ECHA	ECHA	QSAR (6)	ECHA	ECHA	QSAR (58)	ECHA
		Teratogenicity	NOAEL (mg/kg bw/day)	1000	225	1	0	Data gap	Data gap	1	15	900	200	1	1	Data gap	>1250	1000	1	>1200	>1000	0.75	1000
			Source	ECHA	ECHA	QSAR data (1)	QSAR data (1)			QSAR data (1)	ECHA	ECHA	ECHA	QSAR (4)	QSAR (4)		ECHA	ECHA	QSAR (1)	ECHA	ECHA	QSAR (4)	ECHA
		Skin sensitization	Conclusion	Data gap	Data gap	Data gap	0	0	Data gap	Not sensitizing	Not sensitizing	Poential sensitizing	Not sensitizing	Not sensitizing	Not sensitizing	Not sensitizing	Skin sensitizing	Not sensitizing	Data gap	Not sensitizing	Not sensitizing	0.8	Not sensitizing
			Source				QSAR (1)	QSAR (2)		ECHA	ECHA	ECHA	ECHA	ECHA	ECHA	ECHA	ECHA	ECHA		ECHA	ECHA	QSAR (5)	ECHA
		Skin irritation	Conclusion	1	1	1	1	1	1	Not irritating	Not irritating	Not irritating	Not irritating	Not irritating	Corrosive to skin	Not irritating	Corrosive to skin	Not irritating	1	Not irritating	Not irritating	1	Not irritating
			Source	QSAR (1)	QSAR (1)	QSAR (1)	QSAR (1)	QSAR (4)	QSAR (1)	ECHA	ECHA	ECHA	ECHA	ECHA	ECHA	ECHA	ECHA	ECHA	QSAR (1)	ECHA	ECHA	QSAR (2)	ECHA
		Eyes irritation	Conclusion	1	Data gap	Data gap	1	Data gap	1	Not irritating	Not irritating	Positive indication of irritation	Positive indication of irritation	Serious eye damaging	Positive indication for corrosion or severe eye irritation	Not irritating	Positive indication of irritation	Not irritating	Data gap	Not irritating	Not irritating	Data gap	Not irritating
			Source	QSAR (1)			QSAR (1)		QSAR (1)	ECHA	ECHA	ECHA	ECHA	ECHA	ECHA	ECHA	ECHA	ECHA		ECHA	ECHA		ECHA
		Acute Toxicity (oral)	LD50 (mg/kg bw/day)	12108.22	2000	2000 (NOAEL)	Data gap	16682	Data gap	2000	400	9450	>10000	>2000	2350	300	3530	>6600	Data gap	>2000	>2000	2267.91	>2000
			Source	QSAR (1)	ECHA	ECHA		QSAR (3)		ECHA	ECHA	ECHA	ECHA	ECHA	ECHA	ECHA	ECHA	ECHA		ECHA	ECHA	QSAR (2)	ECHA
		Acute Toxicity (dermal)	LD50 (mg/kg bw/day)	Data gap	Data gap	Data gap	Data gap	Data gap	Data gap	Data gap	Data gap	Data gap	Data gap	Data gap	Data gap	Data gap	>5000	>3000	Data gap	>20000	>2000	530	>2000
			Source														ECHA	ECHA		ECHA	ECHA	QSAR (1)	ECHA
		STOT RE (oral)	NOAEL (mg/kg bw/day)	Data gap	53	150	Data gap	Data gap	Data gap	1000	45	1000	2000	Negative	Negative	Negative	>1250	1000	Data gap	695	>1000	Positive	1000
			Source		ECHA	ECHA				ECHA	ECHA	ECHA	ECHA	QSAR (1)	QSAR (1)	QSAR (1)	ECHA	ECHA		ECHA	ECHA	QSAR (3)	ECHA
		Endocrine disruption - Androgen	NOAEL (mM)	1	Data gap	Data gap	1	1	1	1	1	1	1	1	1	1	0.75	1	1	1	1	1	1
			Source	QSAR (1)			QSAR (1)	QSAR (4)	QSAR (1)	QSAR (4)	QSAR (4)	QSAR (1)	QSAR (5)	QSAR (5)	QSAR (1)	QSAR (5)	QSAR (4)	ECHA	QSAR (1)	QSAR (4)	QSAR (3)	QSAR (4)	QSAR (1)
		Endocrine disruption - Estrogen	NOAEL (mM)	1	Data gap	Data gap	1	1	1	0.5	1	1	Data gap	1	1	0.75	0.89	1	Data gap	0.67	0.8	1	0.83
			Source	QSAR (1)			QSAR (1)	QSAR (3)	QSAR (1)	QSAR (6)	QSAR (11)	QSAR (2)		QSAR (10)	QSAR (1)	QSAR (12)	QSAR (9)	QSAR (4)		QSAR (3)	QSAR (10)	QSAR (8)	QSAR (6)
		Endocrine disruption - Thyroid	NOAEL (mM)	1	1	Data gap	1	1	1	1	1	1	1	1	1	1	1	1	1	1	1	1	1
			Source	QSAR (2)	QSAR (2)		QSAR (2)	QSAR (2)	QSAR (2)	QSAR (2)	QSAR (2)	QSAR (2)	QSAR (2)	QSAR (2)	QSAR (2)	QSAR (2)	QSAR (2)	QSAR (2)	QSAR (2)	QSAR (2)	QSAR (2)	QSAR (2)	QSAR (2)
	TOXICITY TO THE ENVIRONMENT	Toxicity to algae	EC50 (mg/L)	276.1	5.39	1370000	234	464	0.219	100	0.034	3.7	21.03	46	2.8	0.028	109.55	>100	855	>88.2	>0.017	115.65	Data gap
			Source	ECHA	QSAR (1)	QSAR (1)	QSAR (1)	QSAR (1)	QSAR (1)	ECHA	ECHA	ECHA	QSAR (5)	ECHA	ECHA	ECHA	ECHA	ECHA	QSAR (1)	ECHA	ECHA	QSAR (5)
		Acute toxixity to daphnia	LC50 (mg/L)	100	78.1	264	55.6	106	1.48	100	10.9	10	>100	>116	32.6	0.076	50	>1000	1900	96.6	Data gap	27.03	Data gap
			Source	ECHA	QSAR (1)	QSAR (1)	QSAR (1)	QSAR (1)	QSAR (1)	ECHA	ECHA	ECHA	ECHA	ECHA	ECHA	ECHA	ECHA	ECHA	QSAR (1)	ECHA		QSAR (4)
		Chronic toxixity to daphnia	NOEC (mg/L)	43.30	28.70	1620	10.60	20.20	0.09	62.50	0.2	8.96	41.50	2.23	Data gap	0.13	259	6.24	222	0.316	0.7	0.32	Data gap
			Source	QSAR (1)	QSAR (1)	QSAR (1)	QSAR (1)	QSAR (1)	QSAR (1)	QSAR (1)	ECHA	QSAR (1)	QSAR (1)	QSAR (1)		QSAR (1)	QSAR (1)	QSAR (1)	QSAR (1)	ECHA	ECHA	QSAR (1)
		Acute toxixity to fish	LC50 (mg/L)	100	58.18	2987650	45.76	127.58	3.39	100	5.1	18.52	>100	>100	24.2	9.73	416	>10000	516	>90.0	>200	5.19	0.074
			Source	ECHA	QSAR (5)	QSAR (4)	QSAR (5)	QSAR (4)	QSAR (4)	ECHA	ECHA	QSAR (10)	ECHA	ECHA	QSAR (4)	QSAR (8)	ECHA	ECHA	QSAR (5)	ECHA	ECHA	QSAR (11)	QSAR (3)
		Chronic toxixity to fish	NOEC (mg/L)	75.6	5.95	7170	14.3	30.4	0.02	10	0.014	0.55	1.12	29	Data gap	0.36	1.048	9.56	610	0.316	>200	0.45	Data gap
			Source	QSAR (1)	QSAR (1)	QSAR (1)	QSAR (1)	QSAR (1)	QSAR (1)	ECHA	ECHA	QSAR (1)	QSAR (1)	QSAR (1)		QSAR (1)	ECHA	QSAR (1)	QSAR (1)	ECHA	ECHA	QSAR (1)
