# Supplementary material for: Managing PMT/vPvM substances in consumer products through the concepts of essential-use and functional substitution: a case-study for cosmetics
Source: Royal Society of Chemistry journal article supplement (doi:10.1039/d3em00025g), 2023-01-01
Supplement: d3em00025g5.xlsx [file d3em00025g5.xlsx]

## Sheet: READ ME
Supplementary information to
Managing PMT/vPvM Substances in Consumer Products through the Concepts of Essential Use and Functional Substitution: a Case-Study for Cosmetics
Joanke van Dijk1, 2, Romain Figuiere3, Stefan C. Dekker1, Annemarie P. van Wezel2, Ian Cousins3
*: Corresponding author SI material: Romain Figuière (romain.figuiere@aces.su.se)
1 Copernicus Institute of Sustainable Development, Utrecht University, 3584 CB Utrecht, the Netherlands; 2 Institute for Biodiversity and Ecosystem Dynamics, University of Amsterdam, PO Box 94240, 1090 GE Amsterdam, the Netherlands; 3 Department of Environmental Science, Stockholm University, SE-10691 Stockholm, Sweden.
2 Institute for Biodiversity and Ecosystem Dynamics, University of Amsterdam, PO Box 94240, 1090 GE Amsterdam, the Netherlands;
3 Department of Environmental Science, Stockholm University, SE-10691 Stockholm, Sweden.
This file gathers the data which have been used for the different multicriteria decision analysis methods used in this study. All the assumptions which have been made are detailed in the main supplementary information file (please refer to the PDF file). In the tables related to the MAUT and ELECTRE III approach, the cells filled in yellow mean that the data are results from QSAR models,
and the cells filled in red highlight the data gaps.
Table S5.1: Heatmap of chemical alternatives for all case study chemicals for the risk neutral, risk averse and risk seeking scenarios*
		* Criteria for the heatmap colour coding can be found in the SI word file of the publication
Table S5.2: Data used in the MAUT approach to identify safer alternatives
	2A - To Allura Red
	2B - To Benzophenone-4
	2C - To Climbazole
Table S5.3: Data used in the ELECTRE III approach to identify safer alternatives
	3A - To Allura Red
		3A-1: Risk seeking scenario
		3A-2: Risk neutral scenario
		3A-3: Risk averse scenario
	3B - To Benzophenone-4
		3B-1: Risk seeking scenario
		3B-2: Risk neutral scenario
		3B-3: Risk averse scenario
	3C - To Climbazole
		3C-1: Risk seeking scenario
		3C-2: Risk neutral scenario
		3C-3: Risk averse scenario

## Sheet: Table S5.1
Table S4-1: Heatmap of chemical alternatives for each case study chemical for risk neutral, risk averse and risk seeking scenarios
RISK NEUTRAL SCENARIO																															RISK AVERSE SCENARIO
Substance	CAS number	P						B		M	Thuman												Tenv								Substance	CAS number	P						B		M	Thuman
		Anaerobic degradation	Readily-iodegradability	Half-life sediment	Half-life soil	Half-life water	Half-life air	LogKow	LogBCF	LogKoc	Carcinogenicity	Mutagenicity	Teratogenicity	Skin sensitization	Skin irritation	Eye irritation	Acute tox. (oral)	Acute tox. (dermal)	STOT-RE (oral)	Androgen	Estrogen	Thyroid	Algae LC50	Daphnia LC50	Fish LC50	Daphnia NOEC	Fish NOEC	Hazard score	Rank				Anaerobic degradation	Readily-iodegradability	Half-life sediment	Half-life soil	Half-life water	Half-life air	LogKow	LogBCF	LogKoc	Carcinogenicity	Mutagenicity	Teratogenicity	Skin sensitization	Skin irritation	Eye irritation	Acute tox. (oral)	Acute tox. (dermal)
Allura red	25956-17-6	4	4	4	3	4	1	1	1	4	1	1	1	2.5	1	1	1	2.5	2.5	1	1	1	1	2	2	1	1	49.5	2		Allura red	25956-17-6	4	4	4	3	4	1	1	1	4	1	1	1	1.6	1	1	1	1.6
Malvidin chloride	643-84-5	1	4	4	2	2	1	1	1	4	3	1	1	2.5	1	2.5	2	2.5	1	2.5	2.5	1	3	2	2	1	1	51.5	4		Malvidin chloride	643-84-5	1	4	4	2	2	1	1	1	4	3	1	1	1.6	1	1.6	2	1.6
Beetroot red	7659-95-2	1	1	2	1	1	1	1	1	4	2.5	1	1	2.5	1	2.5	2	2.5	1	2.5	2.5	2.5	1	1	1	1	1	41.5	1		Beetroot red	7659-95-2	1	1	2	1	1	1	1	1	4	1.6	1	1	1.6	1	1.6	2	1.6
Pigment red 51	5850-87-3	4	4	4	2	2	1	1	1	4	4	1	4	4	1	1	2.5	2.5	2.5	1	1	1	1	2	2	1	1	55.5	6		Pigment red 51	5850-87-3	4	4	4	2	2	1	1	1	4	4	1	4	4	1	1	1.6	1.6
Pigment red 68	5850-80-6	3	4	4	3	4	1	1	1	4	2	2	2.5	4	1	2.5	1	2.5	1	1	1	1	1	1	1	1	1	51.5	4		Pigment red 68	5850-80-6	3	4	4	3	4	1	1	1	4	2	2	1.6	4	1	1.6	1	1.6
Acid red 180	6408-26-0	3	4	4	3	4	1	1	1	4	3	4	2.5	2.5	1	1	2.5	2.5	2.5	1	3	1	4	3	2	3	3	66.5	7		Acid red 180	6408-26-0	3	4	4	3	4	1	1	1	4	3	4	1.6	1.6	1	1	1.6	1.6
Pigment red 122	980-26-7	4	4	4	3	4	1	1	1	4	3	1	1	1	1	1	2	2.5	1	1	1	1	2	2	2	1	1	50.5	3		Pigment red 122	980-26-7	4	4	4	3	4	1	1	1	4	3	1	1	1	1	1	2	1.6
Benzophenone-4	4065-45-6	3	1	4	2	2	1	1	1	4	1	1	1	4	4	3	1	1	1	2	1	1	1	2	3	1	1	48	2		Benzophenone-4	4065-45-6	3	1	4	2	2	1	1	1	4	1	1	1	4	4	3	1	1
Ensulizole	27503-81-7	3	4	3	1	1	1	1	1	4	1	1	1	1	1	1	1	1	1	1	1	1	2	1	1	1	1	37	1		Ensulizole	27503-81-7	3	4	3	1	1	1	1	1	4	1	1	1	1	1	1	1	1
Benzylidene camphor sulfonic acid	56039-58-8	4	4	4	3	4	1	1	1	4	1	1	1	2.5	1	2.5	2.5	2.5	2.5	1	2.5	1	1	1	1	1	1	52	5		Benzylidene camphor sulfonic acid	56039-58-8	4	4	4	3	4	1	1	1	4	1	1	1	1.6	1	1.6	1.6	1.6
Bisdisulizole disodium	180898-37-7	4	4	4	2	2	1	1	1	4	1	1	1	1	1	1	2	1	1	1	2	1	2	4	2	2	1	48	2		Bisdisulizole disodium	180898-37-7	4	4	4	2	2	1	1	1	4	1	1	1	1	1	1	2	1
Bemotrizinol	187393-00-6	4	4	4	3	4	1		1	2	2	1	1	1	1	1	2	2	1	1	2	1	4	4	1	2	1	51	4		Bemotrizinol	187393-00-6	4	4	4	3	4	1		1	2	2	1	1	1	1	1	2	2
Bornelone	2226-11-01	4	4	4	2	2	1	1	2	4	2	1	2	2	1	2.5	1	2	4	1	1	1	1	2	3	2	2	54.5	7		Bornelone	2226-11-01	4	4	4	2	2	1	1	2	4	2	1	2	2	1	1.6	1	2
Phenylemenis-diphenyltriazine	55514-22-2	4	4	2.5	2.5	2.5	2.5	1	4	2	2	1	1	1	1	1	2	2	1	1	1	1	2.5	2.5	4	2.5	2.5	54	6		Phenylemenis-diphenyltriazine	55514-22-2	4	4	1.6	1.6	1.6	1.6	1	4	2	2	1	1	1	1	1	2	2
Climbazole	38083-17-9	4	4	3	4	1	1	1	1	4	1	1	1	1	1	1	2	2.5	1	1	1	1	4	2	3	2	3	51.5	6		Climbazole	38083-17-9	4	4	3	4	1	1	1	1	4	1	1	1	1	1	1	2	1.6
Octanoic acid	102731-54-4	1	1	1	1	1	1	1	1	4	1	1	1	4	1	4	1	2.5	1	1	1	1	3	3	2	1	2	42.5	3		Octanoic acid	102731-54-4	1	1	1	1	1	1	1	1	4	1	1	1	4	1	4	1	1.6
Caprylylglycine	14246-53-8	2	1	1	1	1	1	1	1	4	1	1	1	1	1	4	1	2.5	1	1	2.5	1	2	2	2	1	1	39	2		Caprylylglycine	14246-53-8	2	1	1	1	1	1	1	1	4	1	1	1	1	1	4	1	1.6
Shikimic acid	138-59-0	1	1	2	1	1	1	1	1	4	1	1	1	1	1	4	1	2.5	1	1	1	1	2	1	2	1	1	36.5	1		Shikimic acid	138-59-0	1	1	2	1	1	1	1	1	4	1	1	1	1	1	4	1	1.6
Ciclopirox olamine	41621-49-2	2	4	1	1	1	1	1	1	4	1	1	1	1	4	4	1	2.5	1	1	1	1	3	2	2	2.5	2.5	47.5	4		Ciclopirox olamine	41621-49-2	2	4	1	1	1	1	1	1	4	1	1	1	1	4	4	1	1.6
Hexamidine diisethionate	659-40-5	1	4	1	1	1	1	2	1	4	1	2	2.5	1	1	1	2	2.5	1	1	2	1	4	4	3	2	2	49	5		Hexamidine diisethionate	659-40-5	1	4	1	1	1	1	2	1	4	1	2	1.6	1	1	1	2	1.6
		Hazard level scores																															Hazard level scores
			Low hazard (1)				Moderate hazard (2)						High hazard (3)					Hazard criterion met (4)						Data gap (2,5)										Low hazard (1)				Moderate hazard (2)						High hazard (3)					Hazard criterion met (4)
RISK SEEKING SCENARIO
Substance	CAS number	P						B		M	Thuman												Tenv
		Anaerobic degradation	Readily-iodegradability	Half-life sediment	Half-life soil	Half-life water	Half-life air	LogKow	LogBCF	LogKoc	Carcinogenicity	Mutagenicity	Teratogenicity	Skin sensitization	Skin irritation	Eye irritation	Acute tox. (oral)	Acute tox. (dermal)	STOT-RE (oral)	Androgen	Estrogen	Thyroid	Algae LC50	Daphnia LC50	Fish LC50	Daphnia NOEC	Fish NOEC	Hazard score	Rank
Allura red	25956-17-6	4	4	4	3	4	1	1	1	4	1	1	1	3.4	1	1	1	3.4	3.4	1	1	1	1	2	2	1	1	52.2	3
Malvidin chloride	643-84-5	1	4	4	2	2	1	1	1	4	3	1	1	3.4	1	3.4	2	3.4	1	3.4	3.4	1	3	2	2	1	1	56	4
Beetroot red	7659-95-2	1	1	2	1	1	1	1	1	4	3.4	1	1	3.4	1	3.4	2	3.4	1	3.4	3.4	3.4	1	1	1	1	1	47.8	1
Pigment red 51	5850-87-3	4	4	4	2	2	1	1	1	4	4	1	4	4	1	1	3.4	3.4	3.4	1	1	1	1	2	2	1	1	58.2	5
Pigment red 68	5850-80-6	3	4	4	3	4	1	1	1	4	2	2	3.4	4	1	3.4	1	3.4	1	1	1	1	1	1	1	1	1	54.2	3
Acid red 180	6408-26-0	3	4	4	3	4	1	1	1	4	3	4	3.4	3.4	1	1	3.4	3.4	3.4	1	3	1	4	3	2	3	3	71	6
Pigment red 122	980-26-7	4	4	4	3	4	1	1	1	4	3	1	1	1	1	1	2	3.4	1	1	1	1	2	2	2	1	1	51.4	2
Benzophenone-4	4065-45-6	3	1	4	2	2	1	1	1	4	1	1	1	4	4	3	1	1	1	2	1	1	1	2	3	1	1	48	2
Ensulizole	27503-81-7	3	4	3	1	1	1	1	1	4	1	1	1	1	1	1	1	1	1	1	1	1	2	1	1	1	1	37	1
Benzylidene camphor sulfonic acid	56039-58-8	4	4	4	3	4	1	1	1	4	1	1	1	3.4	1	3.4	3.4	3.4	3.4	1	3.4	1	1	1	1	1	1	57.4	6
Bisdisulizole disodium	180898-37-7	4	4	4	2	2	1	1	1	4	1	1	1	1	1	1	2	1	1	1	2	1	2	4	2	2	1	48	2
Bemotrizinol	187393-00-6	4	4	4	3	4	1		1	2	2	1	1	1	1	1	2	2	1	1	2	1	4	4	1	2	1	51	4
Bornelone	2226-11-01	4	4	4	2	2	1	1	2	4	2	1	2	2	1	3.4	1	2	4	1	1	1	1	2	3	2	2	55.4	5
Phenylemenis-diphenyltriazine	55514-22-2	4	4	3.4	3.4	3.4	3.4	1	4	2	2	1	1	1	1	1	2	2	1	1	1	1	3.4	3.4	4	3.4	3.4	61.2	7
Climbazole	38083-17-9	4	4	3	4	1	1	1	1	4	1	1	1	1	1	1	2	3.4	1	1	1	1	4	2	3	2	3	52.4	6
Octanoic acid	102731-54-4	1	1	1	1	1	1	1	1	4	1	1	1	4	1	4	1	3.4	1	1	1	1	3	3	2	1	2	43.4	3
Caprylylglycine	14246-53-8	2	1	1	1	1	1	1	1	4	1	1	1	1	1	4	1	3.4	1	1	3.4	1	2	2	2	1	1	40.8	2
Shikimic acid	138-59-0	1	1	2	1	1	1	1	1	4	1	1	1	1	1	4	1	3.4	1	1	1	1	2	1	2	1	1	37.4	1
Ciclopirox olamine	41621-49-2	2	4	1	1	1	1	1	1	4	1	1	1	1	4	4	1	3.4	1	1	1	1	3	2	2	3.4	3.4	50.2	4
Hexamidine diisethionate	659-40-5	1	4	1	1	1	1	2	1	4	1	2	3.4	1	1	1	2	3.4	1	1	2	1	4	4	3	2	2	50.8	5
		Hazard level scores
			Low hazard (1)				Moderate hazard (2)						High hazard (3)					Hazard criterion met (4)						Data gap (3,4)
[truncated: 11 more columns]

## Sheet: Table S5.2A
Table S4-2A: Data used in the MAUT approach to identify safer alternatives to Allura Red
RISK AVERSE SCENARIO (TOXCITY DATA LOG-TRANSFORMED)
	Substance	CAS number	P						B		M	T
			BIOWIN 7	Biodegradability (experimental or BIOWIN 3 and 5)	Half-life sediment (days)	Half-life soil (days)	Half-life water (days)	Half-life air (days)	LogKow	LogBCF	LogKoc	Carcinogenicity	Mutagenicity	Teratogenicity	Skin sensitization	Skin irritation	Eye irritation	Acute tox. (oral) (log mg/kg bw/day)	STOT-RE (oral) (log mg/kg bw)	Androgen	Estrogen	Thyroid	Algae LC50 (log mg/L)	Daphnia LC50 (log mg/L)	Fish LC50 (log mg/L)	Daphnia NOEC - Chronic (mg/L)	Fish NOEC - Chronic (mg/L)
Raw data	Allura Red	25956-17-6	-0.778	0	541.667	120	60	1.45833	-1.283	0.742375	1.274	1	1	1	0.2	1	1	4.08308	0.2	1	1	1	2.44107	2	2	1.63649	1.87852
	Malvidin chloride	643-84-5	1.16	0	337.5	75	37.5	0.0249583	1.74	0.935	2.845	0.333333	1	1	0.2	1	0.2	3.30103	1	0.2	0.2	1	0.731589	1.89265	1.7648	1.45788	0.774517
	Beetroot red (betanin)	7659-95-2	0.78	1	75	17.3333	8.66667	0.0113333	-2.95	-0.521	0.315	0.2	1	1	0.2	1	0.2	3.30103	1	0.2	0.2	0.2	3.73167	2.4216	3.73167	3.20952	3.73167
	Pigment Red 51	5850-87-3	-0.691	0	337.5	75	37.5	0.595833	2.9	1.40375	3.455	0	1	0	0	1	1	1.84445	0.2	1	1	1	2.36922	1.74507	1.66052	1.02531	1.15534
	Pigment Red 68	5850-80-6	-0.36	0	541.667	120	60	0.5875	2.53	1.125	2.495	0.571429	0.777778	0.2	0	1	0.2	4.22225	1	1	1	1	2.66652	2.02531	2.10577	1.30535	1.48287
	Acid Red 180	6408-26-0	-0.387	0	541.667	120	60	0.10625	3.91	2.12429	3.855	0.5	0	0.2	0.2	1	1	1.84445	0.2	1	0.5	1	-0.659556	0.170262	2	-1.04287	2.78533
	Pigment Red 122	980-26-7	-2.0103	0	541.667	120	60	0.0533333	2.2	1.00657	3.23	0.5	1	1	1	1	1	3.30103	1	1	1	1	2	2	2	1.79588	1
	Level 0 (worst)		min	0	max	max	max	max	max	max	-2	0	0	0	0	0	0	1	1	0	0	0	1e-06	1e-06	1e-06	1e-06	1e-06
	Level 1 (best)		1.5	1	0	0	0	0	-3	-1	max	1	1	1	1	1	1	max	max	1	1	1	max	max	max	max	max
Normalized data	Allura Red	25956-17-6	0.351053	0	0	0	0	0	0.75152	0.442313	0.55918	1	1	1	0.2	1	1	0.967039	0.2	1	1	1	0.867381	0.949938	0.822058	0.829195	0.809576
	Malvidin chloride	643-84-5	0.903142	0	0.376923	0.375	0.375	0.982886	0.314038	0.380658	0.827498	0.333333	1	1	0.2	1	0.2	0.781818	1	0.2	0.2	1	0.69172	0.937191	0.79789	0.809802	0.696131
	Beetroot red (betanin)	7659-95-2	0.794889	1	0.861538	0.855556	0.855556	0.992229	0.992764	0.846685	0.395389	0.2	1	1	0.2	1	0.2	0.781818	1	0.2	0.2	0.2	1	1	1	1	1
	Pigment Red 51	5850-87-3	0.375837	0	0.376923	0.375	0.375	0.591429	0.146165	0.230624	0.931682	0	1	0	0	1	1	0.2	0.2	1	1	1	0.859998	0.919667	0.787175	0.762831	0.735263
	Pigment Red 68	5850-80-6	0.470131	0	0	0	0	0.597143	0.199711	0.319845	0.76772	0.571429	0.777778	0.2	0	1	0.2	1	1	1	1	1	0.890548	0.952943	0.832927	0.79324	0.76892
	Acid Red 180	6408-26-0	0.462439	0	0	0	0	0.927143	0	0	1	0.5	0	0.2	0.2	1	1	0.2	0.2	1	0.5	1	0.54877	0.732671	0.822058	0.538262	0.902757
	Pigment Red 122	980-26-7	0	0	0	0	0	0.963429	0.247467	0.35775	0.893254	0.5	1	1	1	1	1	0.781818	1	1	1	1	0.822058	0.949938	0.822058	0.846503	0.719301
			P	B	M	T_HH	T_ENV	Rank P	Rank B	Rank M	Rank T_HH	Rank T_ENV	PBT	PMT	PBMT	Rank PBT	Rank PMT	Rank PBMT
Ranking	Allura Red	25956-17-6	0.0585088	0.596916	0.55918	0.851549	0.85563	7	2	6	2	2	0.590651	0.581217	0.584357	2	7	4
	Malvidin chloride	643-84-5	0.502158	0.347348	0.827498	0.62865	0.786547	2	3	4	4	6	0.566176	0.686213	0.61844	3	3	3
	Beetroot red (betanin)	7659-95-2	0.893295	0.919725	0.395389	0.543802	1	1	1	7	6	1	0.839205	0.708121	0.750442	1	1	1
	Pigment Red 51	5850-87-3	0.349031	0.188395	0.931682	0.581818	0.812987	3	6	2	5	5	0.483058	0.66888	0.572783	6	4	5
	Pigment Red 68	5850-80-6	0.177879	0.259778	0.76772	0.704473	0.847715	5	5	5	3	3	0.497461	0.624447	0.551513	5	5	6
	Acid Red 180	6408-26-0	0.231597	0	1	0.527273	0.708903	4	7	1	7	7	0.366943	0.616943	0.493555	7	6	7
	Pigment Red 122	980-26-7	0.160571	0.302609	0.893254	0.934711	0.831972	6	4	3	1	4	0.557466	0.705127	0.624623	4	2	2
RISK SEEKING SCENARIO (TOXCITY DATA LOG-TRANSFORMED)
	Substance	CAS number	P						B		M	T
			BIOWIN 7	Biodegradability (experimental or BIOWIN 3 and 5)	Half-life sediment (days)	Half-life soil (days)	Half-life water (days)	Half-life air (days)	LogKow	LogBCF	LogKoc	Carcinogenicity	Mutagenicity	Teratogenicity	Skin sensitization	Skin irritation	Eye irritation	Acute tox. (oral) (log mg/kg bw/day)	STOT-RE (oral) (log mg/kg bw)	Androgen	Estrogen	Thyroid	Algae LC50 (log mg/L)	Daphnia LC50 (log mg/L)	Fish LC50 (log mg/L)	Daphnia NOEC - Chronic (mg/L)	Fish NOEC - Chronic (mg/L)
Raw data	Allura Red	25956-17-6	-0.778	0	541.667	120	60	1.45833	-1.283	0.742375	1.274	1	1	1	0.8	1	1	4.08308	0.8	1	1	1	2.44107	2	2	1.63649	1.87852
	Malvidin chloride	643-84-5	1.16	0	337.5	75	37.5	0.0249583	1.74	0.935	2.845	0.333333	1	1	0.8	1	0.8	3.30103	1	0.8	0.8	1	0.731589	1.89265	1.7648	1.45788	0.774517
	Beetroot red (betanin)	7659-95-2	0.78	1	75	17.3333	8.66667	0.0113333	-2.95	-0.521	0.315	0.8	1	1	0.8	1	0.8	3.30103	1	0.8	0.8	0.8	3.73167	2.4216	3.73167	3.20952	3.73167
	Pigment Red 51	5850-87-3	-0.691	0	337.5	75	37.5	0.595833	2.9	1.40375	3.455	0	1	0	0	1	1	4.3778	0.8	1	1	1	2.36922	1.74507	1.66052	1.02531	1.15534
	Pigment Red 68	5850-80-6	-0.36	0	541.667	120	60	0.5875	2.53	1.125	2.495	0.571429	0.777778	0.8	0	1	0.8	4.22225	1	1	1	1	2.66652	2.02531	2.10577	1.30535	1.48287
	Acid Red 180	6408-26-0	-0.387	0	541.667	120	60	0.10625	3.91	2.12429	3.855	0.5	0	0.8	0.8	1	1	4.3778	0.8	1	0.5	1	-0.659556	0.170262	2	-1.04287	2.78533
	Pigment Red 122	980-26-7	-2.0103	0	541.667	120	60	0.0533333	2.2	1.00657	3.23	0.5	1	1	1	1	1	3.30103	1	1	1	1	2	2	2	1.79588	1
	Level 0 (worst)		min	0	max	max	max	max	max	max	-2	0	0	0	0	0	0	1	1	0	0	0	1e-06	1e-06	1e-06	1e-06	1e-06
	Level 1 (best)		1.5	1	0	0	0	0	-3	-1	max	1	1	1	1	1	1	max	max	1	1	1	max	max	max	max	max
Normalized data	Allura Red	25956-17-6	0.351053	0	0	0	0	0	0.75152	0.442313	0.55918	1	1	1	0.8	1	1	0.932679	0.8	1	1	1	0.867381	0.949938	0.822058	0.829195	0.809576
	Malvidin chloride	643-84-5	0.903142	0	0.376923	0.375	0.375	0.982886	0.314038	0.380658	0.827498	0.333333	1	1	0.8	1	0.8	0.754039	1	0.8	0.8	1	0.69172	0.937191	0.79789	0.809802	0.696131
	Beetroot red (betanin)	7659-95-2	0.794889	1	0.861538	0.855556	0.855556	0.992229	0.992764	0.846685	0.395389	0.8	1	1	0.8	1	0.8	0.754039	1	0.8	0.8	0.8	1	1	1	1	1
	Pigment Red 51	5850-87-3	0.375837	0	0.376923	0.375	0.375	0.591429	0.146165	0.230624	0.931682	0	1	0	0	1	1	0.8	0.8	1	1	1	0.859998	0.919667	0.787175	0.762831	0.735263
	Pigment Red 68	5850-80-6	0.470131	0	0	0	0	0.597143	0.199711	0.319845	0.76772	0.571429	0.777778	0.8	0	1	0.8	0.964468	1	1	1	1	0.890548	0.952943	0.832927	0.79324	0.76892
	Acid Red 180	6408-26-0	0.462439	0	0	0	0	0.927143	0	0	1	0.5	0	0.8	0.8	1	1	0.8	0.8	1	0.5	1	0.54877	0.732671	0.822058	0.538262	0.902757
	Pigment Red 122	980-26-7	0	0	0	0	0	0.963429	0.247467	0.35775	0.893254	0.5	1	1	1	1	1	0.754039	1	1	1	1	0.822058	0.949938	0.822058	0.846503	0.719301
			P	B	M	T_HH	T_ENV	Rank P	Rank B	Rank M	Rank T_HH	Rank T_ENV	PBT	PMT	PBMT	Rank PBT	Rank PMT	Rank PBMT
Ranking	Allura Red	25956-17-6	0.0585088	0.596916	0.55918	0.957516	0.85563	7	2	6	1	2	0.617143	0.607709	0.60555	3	7	4
	Malvidin chloride	643-84-5	0.502158	0.347348	0.827498	0.844307	0.786547	2	3	4	4	6	0.62009	0.740127	0.661572	2	2	2
	Beetroot red (betanin)	7659-95-2	0.893295	0.919725	0.395389	0.868549	1	1	1	7	3	1	0.920392	0.789308	0.815391	1	1	1
	Pigment Red 51	5850-87-3	0.349031	0.188395	0.931682	0.690909	0.812987	3	6	2	7	5	0.51033	0.696152	0.594601	6	4	5
	Pigment Red 68	5850-80-6	0.177879	0.259778	0.76772	0.810334	0.847715	5	5	5	5	3	0.523926	0.650912	0.572685	5	6	6
	Acid Red 180	6408-26-0	0.231597	0	1	0.745455	0.708903	4	7	1	6	7	0.421489	0.671489	0.537191	7	5	7
	Pigment Red 122	980-26-7	0.160571	0.302609	0.893254	0.932185	0.831972	6	4	3	2	4	0.556834	0.704496	0.624118	4	3	3
RISK NEUTRAL SCENARIO (TOXCITY DATA LOG-TRANSFORMED)
	Substance	CAS number	P						B		M	T
			BIOWIN 7	Biodegradability (experimental or BIOWIN 3 and 5)	Half-life sediment (days)	Half-life soil (days)	Half-life water (days)	Half-life air (days)	LogKow	LogBCF	LogKoc	Carcinogenicity	Mutagenicity	Teratogenicity	Skin sensitization	Skin irritation	Eye irritation	Acute tox. (oral) (log mg/kg bw/day)	STOT-RE (oral) (log mg/kg bw)	Androgen	Estrogen	Thyroid	Algae LC50 (log mg/L)	Daphnia LC50 (log mg/L)	Fish LC50 (log mg/L)	Daphnia NOEC - Chronic (mg/L)	Fish NOEC - Chronic (mg/L)
Raw data	Allura Red	25956-17-6	-0.778	0	541.667	120	60	1.45833	-1.283	0.742375	1.274	1	1	1	0.5	1	1	4.08308	0.5	1	1	1	2.44107	2	2	1.63649	1.87852
	Malvidin chloride	643-84-5	1.16	0	337.5	75	37.5	0.0249583	1.74	0.935	2.845	0.333333	1	1	0.5	1	0.5	3.30103	1	0.5	0.5	1	0.731589	1.89265	1.7648	1.45788	0.774517
	Beetroot red (betanin)	7659-95-2	0.78	1	75	17.3333	8.66667	0.0113333	-2.95	-0.521	0.315	0.5	1	1	0.5	1	0.5	3.30103	1	0.5	0.5	0.5	3.73167	2.4216	3.73167	3.20952	3.73167
	Pigment Red 51	5850-87-3	-0.691	0	337.5	75	37.5	0.595833	2.9	1.40375	3.455	0	1	0	0	1	1	3.11112	0.5	1	1	1	2.36922	1.74507	1.66052	1.02531	1.15534
	Pigment Red 68	5850-80-6	-0.36	0	541.667	120	60	0.5875	2.53	1.125	2.495	0.571429	0.777778	0.5	0	1	0.5	4.22225	1	1	1	1	2.66652	2.02531	2.10577	1.30535	1.48287
	Acid Red 180	6408-26-0	-0.387	0	541.667	120	60	0.10625	3.91	2.12429	3.855	0.5	0	0.5	0.5	1	1	3.11112	0.5	1	0.5	1	-0.659556	0.170262	2	-1.04287	2.78533
	Pigment Red 122	980-26-7	-2.0103	0	541.667	120	60	0.0533333	2.2	1.00657	3.23	0.5	1	1	1	1	1	3.30103	1	1	1	1	2	2	2	1.79588	1
	Level 0 (worst)		min	0	max	max	max	max	max	max	-2	0	0	0	0	0	0	1	1	0	0	0	1e-06	1e-06	1e-06	1e-06	1e-06
	Level 1 (best)		1.5	1	0	0	0	0	-3	-1	max	1	1	1	1	1	1	max	max	1	1	1	max	max	max	max	max
Normalized data	Allura Red	25956-17-6	0.351053	0	0	0	0	0	0.75152	0.442313	0.55918	1	1	1	0.5	1	1	0.967039	0.5	1	1	1	0.867381	0.949938	0.822058	0.829195	0.809576
	Malvidin chloride	643-84-5	0.903142	0	0.376923	0.375	0.375	0.982886	0.314038	0.380658	0.827498	0.333333	1	1	0.5	1	0.5	0.781818	1	0.5	0.5	1	0.69172	0.937191	0.79789	0.809802	0.696131
	Beetroot red (betanin)	7659-95-2	0.794889	1	0.861538	0.855556	0.855556	0.992229	0.992764	0.846685	0.395389	0.5	1	1	0.5	1	0.5	0.781818	1	0.5	0.5	0.5	1	1	1	1	1
	Pigment Red 51	5850-87-3	0.375837	0	0.376923	0.375	0.375	0.591429	0.146165	0.230624	0.931682	0	1	0	0	1	1	0.5	0.5	1	1	1	0.859998	0.919667	0.787175	0.762831	0.735263
	Pigment Red 68	5850-80-6	0.470131	0	0	0	0	0.597143	0.199711	0.319845	0.76772	0.571429	0.777778	0.5	0	1	0.5	1	1	1	1	1	0.890548	0.952943	0.832927	0.79324	0.76892
	Acid Red 180	6408-26-0	0.462439	0	0	0	0	0.927143	0	0	1	0.5	0	0.5	0.5	1	1	0.5	0.5	1	0.5	1	0.54877	0.732671	0.822058	0.538262	0.902757
	Pigment Red 122	980-26-7	0	0	0	0	0	0.963429	0.247467	0.35775	0.893254	0.5	1	1	1	1	1	0.781818	1	1	1	1	0.822058	0.949938	0.822058	0.846503	0.719301
			P	B	M	T_HH	T_ENV	Rank P	Rank B	Rank M	Rank T_HH	Rank T_ENV	PBT	PMT	PBMT	Rank PBT	Rank PMT	Rank PBMT
Ranking	Allura Red	25956-17-6	0.0585088	0.596916	0.55918	0.906094	0.85563	7	2	6	2	2	0.604287	0.594853	0.595266	2	7	4
	Malvidin chloride	643-84-5	0.502158	0.347348	0.827498	0.737741	0.786547	2	3	4	4	6	0.593449	0.713486	0.640258	3	2	2
	Beetroot red (betanin)	7659-95-2	0.893295	0.919725	0.395389	0.707438	1	1	1	7	5	1	0.880114	0.74903	0.783169	1	1	1
	Pigment Red 51	5850-87-3	0.349031	0.188395	0.931682	0.636364	0.812987	3	6	2	6	5	0.496694	0.682516	0.583692	6	4	5
	Pigment Red 68	5850-80-6	0.177879	0.259778	0.76772	0.759019	0.847715	5	5	5	3	3	0.511098	0.638083	0.562422	5	6	6
	Acid Red 180	6408-26-0	0.231597	0	1	0.636364	0.708903	4	7	1	6	7	0.394216	0.644216	0.515373	7	5	7
	Pigment Red 122	980-26-7	0.160571	0.302609	0.893254	0.934711	0.831972	6	4	3	1	4	0.557466	0.705127	0.624623	4	3	3

## Sheet: Table S5.2B
Table S4-2B: Data used in the MAUT approach to identify safer alternatives to Benzophenone-4
RISK AVERSE SCENARIO (TOXCITY DATA LOG-TRANSFORMED)
	Substance	CAS number	P						B		M	T
			BIOWIN 7	Biodegradability (experimental or BIOWIN 3 and 5)	Half-life sediment (days)	Half-life soil (days)	Half-life water (days)	Half-life air (days)	LogKow	LogBCF	LogKoc	Carcinogenicity	Mutagenicity	Teratogenicity	Skin sensitization	Skin irritation	Eye irritation	Acute tox. (oral) (log mg/kg bw/day)	Acute tox. (dermal) (log mg/kg bw/day)	STOT-RE (oral) (log mg/kg bw)	Androgen	Estrogen	Thyroid	Algae LC50 (log mg/L)	Daphnia LC50 (log mg/L)	Fish LC50 (log mg/L)	Daphnia NOEC - Chronic (mg/L)	Fish NOEC - Chronic (mg/L)
Raw data	Benzophenone-4	4065-45-6	-0.2	1	341.66	75	37.5	0.143	0.515	0.14	0.992	0.928571	1	1	0	0	0.5	3.54777	3.69897	1	0.75	0.888889	1	2.03961	1	2.61909	2.4133	0.68993
	Ensulizole	27503-81-7	-0.09	0	135	30	15	0.883	-1.42	-0.09	1.975	0.941176	1	1	1	1	1	3.81954	3.47712	1	1	1	1	2	3	4	0.795185	0.980458
	Benzylidene Camphor Sulfonic Acid	56039-58-8	-1.5	0	541.66	120	60	0.05	2.22	1.05	2.353	1	1	1	0.2	1	0.2	1.76391	1.86021	0.2	1	0.2	1	2.93197	3.27875	2.71265	2.34635	2.78533
	Bisdisulizole disodium	180898-37-7	-1.43	0	337.5	75	37.5	1.608	-2.4	-0.38	3.788	1	1	1	1	1	1	3.30103	4.30103	1	1	0.666667	1	1.94547	1.98498	1.95424	-0.500313	2.17319
	Bemotrizinol	187393-00-6	-0.61	0	541.666	120	60	0.043	5.7	0.19	8.195	0.647059	1	1	1	1	1	3.30103	3.30103	1	1	0.8	1	-1.76955	2.57978	2.30103	-0.154902	2.30103
	Bornelone	2226-11-1	-0.63	0	337.5	75	37.5	0.0345	4.26	2.95	3.305	0.736842	0.948276	0.75	0.8	1	0.2	3.35562	2.72428	0	1	1	1	2.06314	1.43177	0.715167	-0.49485	-0.343902
	Phenylemenis-Diphenyltriazine	55514-22-2	-0.58	0	433.333	96	48	1.2864	10.5	3.76	7.115	0.75	1	1	1	1	1	3.30103	3.30103	1	1	0.833333	1	-4.21361	-4.14425	-1.13077	-4.31734	-4.24293
	Level 0 (worst)		min	0	max	max	max	max	max	max	-2	0	0	0	0	0	0	1	1	0	0	0	0	1e-06	1e-06	1e-06	1e-06	1e-06
	Level 1 (best)		1.5	1	0	0	0	0	-3	-1	max	1	1	1	1	1	1	max	max	1	1	1	1	max	max	max	max	max
Normalized data	Benzophenone-4	4065-45-6	0.433333	1	0.369242	0.375	0.375	0.91107	0.73963	0.760504	0.293477	0.928571	1	1	0	0	0.5	0.928848	0.86002	1	0.75	0.888889	1	0.900094	0.754412	0.861909	1	0.761489
	Ensulizole	27503-81-7	0.47	0	0.750769	0.75	0.75	0.450871	0.882963	0.808824	0.389897	0.941176	1	1	1	1	1	1	0.808439	1	1	1	1	0.895659	0.969958	1	0.807672	0.794558
	Benzylidene Camphor Sulfonic Acid	56039-58-8	0	0	1.10769e-05	0	0	0.968905	0.613333	0.569328	0.426974	1	1	1	0.2	1	0.2	0.2	0.2	0.2	1	0.2	1	1	1	0.871265	0.992043	1
	Bisdisulizole disodium	180898-37-7	0.0233333	0	0.376922	0.375	0.375	0	0.955556	0.869748	0.567729	1	1	1	1	1	1	0.864247	1	1	1	0.666667	1	0.889554	0.860566	0.795424	0.65369	0.930322
	Bemotrizinol	187393-00-6	0.296667	0	0	0	0	0.973259	0.355556	0.75	1	0.647059	1	1	1	1	1	0.864247	0.767498	1	1	0.8	1	0.47363	0.92467	0.830103	0.694745	0.944874
	Bornelone	2226-11-1	0.29	0	0.376922	0.375	0.375	0.978545	0.462222	0.170168	0.520353	0.736842	0.948276	0.75	0.8	1	0.2	0.878541	0.633401	0	1	1	1	0.902728	0.800944	0.671517	0.654339	0.643812
	Phenylemenis-Diphenyltriazine	55514-22-2	0.306667	0	0.2	0.2	0.2	0.2	0	0	0.894066	0.75	1	1	1	1	1	0.864247	0.767498	1	1	0.833333	1	0.2	0.2	0.486923	0.2	0.2
			P	B	M	T_HH	T_ENV	Rank P	Rank B	Rank M	Rank T_HH	Rank T_ENV	PBT	PMT	PBMT	Rank PBT	Rank PMT	Rank PBMT
Ranking	Benzophenone-4	4065-45-6	0.577274	0.750067	0.293477	0.738027	0.855581	1	3	7	6	3	0.730237	0.61609	0.642885	2	4	4
	Ensulizole	27503-81-7	0.528607	0.845893	0.389897	0.979135	0.89357	2	2	6	1	2	0.811801	0.697802	0.72742	1	2	1
	Benzylidene Camphor Sulfonic Acid	56039-58-8	0.161486	0.591331	0.426974	0.6	0.972662	7	4	5	7	1	0.58137	0.54028	0.55049	5	7	5
	Bisdisulizole disodium	180898-37-7	0.191709	0.912652	0.567729	0.960909	0.825911	5	1	3	2	4	0.722795	0.636565	0.691782	3	3	3
	Bemotrizinol	187393-00-6	0.211654	0.552778	1	0.923234	0.773604	4	5	1	4	5	0.615318	0.727123	0.692254	4	1	2
	Bornelone	2226-11-1	0.399245	0.316195	0.520353	0.745588	0.734668	3	6	4	5	6	0.548924	0.599963	0.54321	6	5	6
	Phenylemenis-Diphenyltriazine	55514-22-2	0.184444	0	0.894066	0.93459	0.257385	6	7	2	3	7	0.344105	0.567621	0.454097	7	6	7
RISK SEEKING SCENARIO (TOXCITY DATA LOG-TRANSFORMED)
	Substance	CAS number	P						B		M	T
			BIOWIN 7	Biodegradability (experimental or BIOWIN 3 and 5)	Half-life sediment (days)	Half-life soil (days)	Half-life water (days)	Half-life air (days)	LogKow	LogBCF	LogKoc	Carcinogenicity	Mutagenicity	Teratogenicity	Skin sensitization	Skin irritation	Eye irritation	Acute tox. (oral) (log mg/kg bw/day)	Acute tox. (dermal) (log mg/kg bw/day)	STOT-RE (oral) (log mg/kg bw)	Androgen	Estrogen	Thyroid	Algae LC50 (log mg/L)	Daphnia LC50 (log mg/L)	Fish LC50 (log mg/L)	Daphnia NOEC - Chronic (mg/L)	Fish NOEC - Chronic (mg/L)
Raw data	Benzophenone-4	4065-45-6	-0.2	1	341.66	75	37.5	0.143	0.515	0.14	0.992	0.928571	1	1	0	0	0.5	3.54777	3.69897	1	0.75	0.888889	1	2.03961	1	2.61909	2.4133	0.68993
	Ensulizole	27503-81-7	-0.09	0	135	30	15	0.883	-1.42	-0.09	1.975	0.941176	1	1	1	1	1	3.81954	3.47712	1	1	1	1	2	3	4	0.795185	0.980458
	Benzylidene Camphor Sulfonic Acid	56039-58-8	-1.5	0	541.66	120	60	0.05	2.22	1.05	2.353	1	1	1	0.8	1	0.8	4.05564	4.44082	0.8	1	0.8	1	2.93197	3.27875	2.71265	2.34635	2.78533
	Bisdisulizole disodium	180898-37-7	-1.43	0	337.5	75	37.5	1.608	-2.4	-0.38	3.788	1	1	1	1	1	1	3.30103	4.30103	1	1	0.666667	1	1.94547	1.98498	1.95424	-0.500313	2.17319
	Bemotrizinol	187393-00-6	-0.61	0	541.666	120	60	0.043	5.7	0.19	8.195	0.647059	1	1	1	1	1	3.30103	3.30103	1	1	0.8	1	-1.76955	2.57978	2.30103	-0.154902	2.30103
	Bornelone	2226-11-1	-0.63	0	337.5	75	37.5	0.0345	4.26	2.95	3.305	0.736842	0.948276	0.75	0.8	1	0.8	3.35562	2.72428	0	1	1	1	2.06314	1.43177	0.715167	-0.49485	-0.343902
	Phenylemenis-Diphenyltriazine	55514-22-2	-0.58	0	108.333	24	12	0.3216	10.5	3.76	7.115	0.75	1	1	1	1	1	3.30103	3.30103	1	1	0.833333	1	1.14557	1.423	-1.13077	0.73064	1.02826
	Level 0 (worst)		min	0	max	max	max	max	max	max	-2	0	0	0	0	0	0	1	1	0	0	0	0	1e-06	1e-06	1e-06	1e-06	1e-06
	Level 1 (best)		1.5	1	0	0	0	0	-3	-1	max	1	1	1	1	1	1	max	max	1	1	1	1	max	max	max	max	max
Normalized data	Benzophenone-4	4065-45-6	0.433333	1	0.369242	0.375	0.375	0.91107	0.73963	0.760504	0.293477	0.928571	1	1	0	0	0.5	0.874777	0.832947	1	0.75	0.888889	1	0.900094	0.754412	0.861909	1	0.761489
	Ensulizole	27503-81-7	0.47	0	0.750769	0.75	0.75	0.450871	0.882963	0.808824	0.389897	0.941176	1	1	1	1	1	0.941787	0.78299	1	1	1	1	0.895659	0.969958	1	0.807672	0.794558
	Benzylidene Camphor Sulfonic Acid	56039-58-8	0	0	1.10769e-05	0	0	0.968905	0.613333	0.569328	0.426974	1	1	1	0.8	1	0.8	0.8	0.8	0.8	1	0.8	1	1	1	0.871265	0.992043	1
	Bisdisulizole disodium	180898-37-7	0.0233333	0	0.376922	0.375	0.375	0	0.955556	0.869748	0.567729	1	1	1	1	1	1	0.813937	0.968521	1	1	0.666667	1	0.889554	0.860566	0.795424	0.65369	0.930322
	Bemotrizinol	187393-00-6	0.296667	0	0	0	0	0.973259	0.355556	0.75	1	0.647059	1	1	1	1	1	0.813937	0.743337	1	1	0.8	1	0.47363	0.92467	0.830103	0.694745	0.944874
	Bornelone	2226-11-1	0.29	0	0.376922	0.375	0.375	0.978545	0.462222	0.170168	0.520353	0.736842	0.948276	0.75	0.8	1	0.8	0.827398	0.613462	0	1	1	1	0.902728	0.800944	0.671517	0.654339	0.643812
	Phenylemenis-Diphenyltriazine	55514-22-2	0.306667	0	0.8	0.8	0.8	0.8	0	0	0.894066	0.75	1	1	1	1	1	0.813937	0.743337	1	1	0.833333	1	0.8	0.8	0.486923	0.8	0.8
			P	B	M	T_HH	T_ENV	Rank P	Rank B	Rank M	Rank T_HH	Rank T_ENV	PBT	PMT	PBMT	Rank PBT	Rank PMT	Rank PBMT
Ranking	Benzophenone-4	4065-45-6	0.577274	0.750067	0.293477	0.731265	0.855581	2	3	7	7	3	0.728547	0.614399	0.641533	2	6	4
	Ensulizole	27503-81-7	0.528607	0.845893	0.389897	0.972163	0.89357	3	2	6	1	2	0.810058	0.696059	0.726026	1	3	1
	Benzylidene Camphor Sulfonic Acid	56039-58-8	0.161486	0.591331	0.426974	0.9	0.972662	7	4	5	5	1	0.65637	0.61528	0.61049	4	5	6
	Bisdisulizole disodium	180898-37-7	0.191709	0.912652	0.567729	0.954094	0.825911	6	1	3	2	4	0.721091	0.634861	0.690419	3	4	3
	Bemotrizinol	187393-00-6	0.211654	0.552778	1	0.917028	0.773604	5	5	1	4	5	0.613766	0.725572	0.691013	5	2	2
	Bornelone	2226-11-1	0.399245	0.316195	0.520353	0.789665	0.734668	4	6	4	6	7	0.559943	0.610983	0.552025	7	7	7
	Phenylemenis-Diphenyltriazine	55514-22-2	0.584444	0	0.894066	0.928384	0.737385	1	7	2	3	6	0.562553	0.78607	0.628856	6	1	5
RISK NEUTRAL SCENARIO (TOXCITY DATA LOG-TRANSFORMED)
	Substance	CAS number	P						B		M	T
			BIOWIN 7	Biodegradability (experimental or BIOWIN 3 and 5)	Half-life sediment (days)	Half-life soil (days)	Half-life water (days)	Half-life air (days)	LogKow	LogBCF	LogKoc	Carcinogenicity	Mutagenicity	Teratogenicity	Skin sensitization	Skin irritation	Eye irritation	Acute tox. (oral) (log mg/kg bw/day)	Acute tox. (dermal) (log mg/kg bw/day)	STOT-RE (oral) (log mg/kg bw)	Androgen	Estrogen	Thyroid	Algae LC50 (log mg/L)	Daphnia LC50 (log mg/L)	Fish LC50 (log mg/L)	Daphnia NOEC - Chronic (mg/L)	Fish NOEC - Chronic (mg/L)
Raw data	Benzophenone-4	4065-45-6	-0.2	1	341.66	75	37.5	0.143	0.515	0.14	0.992	0.928571	1	1	0	0	0.5	3.54777	3.69897	1	0.75	0.888889	1	2.03961	1	2.61909	2.4133	0.68993
	Ensulizole	27503-81-7	-0.09	0	135	30	15	0.883	-1.42	-0.09	1.975	0.941176	1	1	1	1	1	3.81954	3.47712	1	1	1	1	2	3	4	0.795185	0.980458
	Benzylidene Camphor Sulfonic Acid	56039-58-8	-1.5	0	541.66	120	60	0.05	2.22	1.05	2.353	1	1	1	0.5	1	0.5	2.90977	3.15051	0.5	1	0.5	1	2.93197	3.27875	2.71265	2.34635	2.78533
	Bisdisulizole disodium	180898-37-7	-1.43	0	337.5	75	37.5	1.608	-2.4	-0.38	3.788	1	1	1	1	1	1	3.30103	4.30103	1	1	0.666667	1	1.94547	1.98498	1.95424	-0.500313	2.17319
	Bemotrizinol	187393-00-6	-0.61	0	541.666	120	60	0.043	5.7	0.19	8.195	0.647059	1	1	1	1	1	3.30103	3.30103	1	1	0.8	1	-1.76955	2.57978	2.30103	-0.154902	2.30103
	Bornelone	2226-11-1	-0.63	0	337.5	75	37.5	0.0345	4.26	2.95	3.305	0.736842	0.948276	0.75	0.8	1	0.5	3.35562	2.72428	0	1	1	1	2.06314	1.43177	0.715167	-0.49485	-0.343902
	Phenylemenis-Diphenyltriazine	55514-22-2	-0.58	0	270.833	60	30	0.804	10.5	3.76	7.115	0.75	1	1	1	1	1	3.30103	3.30103	1	1	0.833333	1	-1.53402	-1.36062	-1.13077	-1.79335	-1.60734
	Level 0 (worst)		min	0	max	max	max	max	max	max	-2	0	0	0	0	0	0	1	1	0	0	0	0	1e-06	1e-06	1e-06	1e-06	1e-06
	Level 1 (best)		1.5	1	0	0	0	0	-3	-1	max	1	1	1	1	1	1	max	max	1	1	1	1	max	max	max	max	max
Normalized data	Benzophenone-4	4065-45-6	0.433333	1	0.369242	0.375	0.375	0.91107	0.73963	0.760504	0.293477	0.928571	1	1	0	0	0.5	0.928848	0.86002	1	0.75	0.888889	1	0.900094	0.754412	0.861909	1	0.761489
	Ensulizole	27503-81-7	0.47	0	0.750769	0.75	0.75	0.450871	0.882963	0.808824	0.389897	0.941176	1	1	1	1	1	1	0.808439	1	1	1	1	0.895659	0.969958	1	0.807672	0.794558
	Benzylidene Camphor Sulfonic Acid	56039-58-8	0	0	1.10769e-05	0	0	0.968905	0.613333	0.569328	0.426974	1	1	1	0.5	1	0.5	0.5	0.5	0.5	1	0.5	1	1	1	0.871265	0.992043	1
	Bisdisulizole disodium	180898-37-7	0.0233333	0	0.376922	0.375	0.375	0	0.955556	0.869748	0.567729	1	1	1	1	1	1	0.864247	1	1	1	0.666667	1	0.889554	0.860566	0.795424	0.65369	0.930322
	Bemotrizinol	187393-00-6	0.296667	0	0	0	0	0.973259	0.355556	0.75	1	0.647059	1	1	1	1	1	0.864247	0.767498	1	1	0.8	1	0.47363	0.92467	0.830103	0.694745	0.944874
	Bornelone	2226-11-1	0.29	0	0.376922	0.375	0.375	0.978545	0.462222	0.170168	0.520353	0.736842	0.948276	0.75	0.8	1	0.5	0.878541	0.633401	0	1	1	1	0.902728	0.800944	0.671517	0.654339	0.643812
	Phenylemenis-Diphenyltriazine	55514-22-2	0.306667	0	0.5	0.5	0.5	0.5	0	0	0.894066	0.75	1	1	1	1	1	0.864247	0.767498	1	1	0.833333	1	0.5	0.5	0.486923	0.5	0.5
			P	B	M	T_HH	T_ENV	Rank P	Rank B	Rank M	Rank T_HH	Rank T_ENV	PBT	PMT	PBMT	Rank PBT	Rank PMT	Rank PBMT
Ranking	Benzophenone-4	4065-45-6	0.577274	0.750067	0.293477	0.738027	0.855581	1	3	7	7	3	0.730237	0.61609	0.642885	2	5	4
	Ensulizole	27503-81-7	0.528607	0.845893	0.389897	0.979135	0.89357	2	2	6	1	2	0.811801	0.697802	0.72742	1	2	1
	Benzylidene Camphor Sulfonic Acid	56039-58-8	0.161486	0.591331	0.426974	0.75	0.972662	7	4	5	6	1	0.61887	0.57778	0.58049	4	7	5
	Bisdisulizole disodium	180898-37-7	0.191709	0.912652	0.567729	0.960909	0.825911	6	1	3	2	4	0.722795	0.636565	0.691782	3	4	3
	Bemotrizinol	187393-00-6	0.211654	0.552778	1	0.923234	0.773604	5	5	1	4	5	0.615318	0.727123	0.692254	5	1	2
	Bornelone	2226-11-1	0.399245	0.316195	0.520353	0.770588	0.734668	3	6	4	5	6	0.555174	0.606213	0.54821	6	6	6
	Phenylemenis-Diphenyltriazine	55514-22-2	0.384444	0	0.894066	0.93459	0.497385	4	7	2	3	7	0.454105	0.677621	0.542097	7	3	7

## Sheet: Table S5.2C
Table S4-2C: Data used in the MAUT approach to identify safer alternatives to Climbazole
RISK AVERSE SCENARIO (TOXCITY DATA LOG-TRANSFORMED)
	Substance	CAS number	P						B		M	T
			BIOWIN 7	Biodegradability (experimental or BIOWIN 3 and 5)	Half-life sediment (days)	Half-life soil (days)	Half-life water (days)	Half-life air (days)	LogKow	LogBCF	LogKoc	Carcinogenicity	Mutagenicity	Teratogenicity	Skin sensitization	Skin irritation	Eye irritation	Acute tox. (oral) (log mg/kg bw/day)	STOT-RE (oral) (log mg/kg bw)	Androgen	Estrogen	Thyroid	Algae LC50 (log mg/L)	Daphnia LC50 (log mg/L)	Fish LC50 (log mg/L)	Daphnia NOEC - Chronic (mg/L)	Fish NOEC - Chronic (mg/L)
Raw data	Climbazole	38083-17-9	-1.19	0	157	753	7	-1.396	3.83	2.44	3.744	0.0714	0	1	0	0	0	2.60206	1	1	1	1	-1.46852	1.03743	0.70757	-0.69897	-1.85387
	Octanoic acid	102731-54-4	0.977	1	13	7	7	-1.559	3.33	1.41	2.14	0	0	1	1	0	1	3.97543	1	1	1	1	0.568202	1	1.26757	0.952308	-0.25649
	Caprylylglycine	14246-53-8	0.24	1	13	7	6	-1.316	2.052	1	1.25	0	0	1	0	0	1	4	1	1	0.2	1	1.3228	2	2	1.61805	0.049218
	Shikimic acid	138-59-0	1.35	1	73	16	10	-0.768	-1.5	-0.22	-0.21	0	0	1	0	0	1	3.30103	1	1	1	1	1.66276	2.06446	2	0.348305	1.4624
	Ciclopirox olamine	41621-49-2	0.0488	0	13	34	15	-0.585	0.52	1.6	2.76	0	0	1	0	1	1	3.37107	1	1	1	1	0.447158	1.51322	1.38382	-4.47639	-4.50752
	Hexamidine Diisethionate	659-40-5	0.8025	0	43	25	12.5	-0.6765	4.47	0.75	1.71	0.1971	0.29	0.2	0	0	0	2.47712	1	1	0.75	1	-1.55909	-1.11976	0.988068	-0.89279	-0.500313
	Level 0 (worst)		min	0	max	max	max	max	max	max	-2	0	0	0	0	0	0	1	0	0	0	0	1e-06	1e-06	1e-06	1e-06	1e-06
	Level 1 (best)		1.5	1	0	0	0	0	-3	-1	max	1	1	1	1	1	1	max	1	1	1	1	max	max	max	max	max
Normalized data	Climbazole	38083-17-9	0	0	0	0	0.533333	1	0.085676	0	1	0.0714	0	1	0	0	0	0.650515	1	1	1	1	0.591364	0.872647	0.838446	0.695851	0.555603
	Octanoic acid	102731-54-4	0.805576	1	0.917197	0.990704	0.533333	1	0.15261	0.299419	0.720752	0	0	1	1	0	1	0.993858	1	1	1	1	0.857159	0.868006	0.908446	0.91261	0.76966
	Caprylylglycine	14246-53-8	0.531599	1	0.917197	0.990704	0.6	1	0.323695	0.418605	0.565808	0	0	1	0	0	1	1	1	1	0.2	1	0.955635	0.992007	1	1	0.810627
	Shikimic acid	138-59-0	0.944238	1	0.535032	0.978752	0.333333	1	0.799197	0.773256	0.31163	0	0	1	0	0	1	0.825257	1	1	1	1	1	1	1	0.833324	1
	Ciclopirox olamine	41621-49-2	0.46052	0	0.917197	0.954847	0	1	0.528782	0.244186	0.828691	0	0	1	0	1	1	0.842767	1	1	1	1	0.841363	0.931646	0.922977	0.2	0.2
	Hexamidine Diisethionate	659-40-5	0.740706	0	0.726115	0.966799	0.166667	1	0	0.491279	0.645891	0.1971	0.29	0.2	0	0	0	0.61928	1	1	0.75	1	0.579544	0.605154	0.873509	0.670409	0.736987
			P	B	M	T_HH	T_ENV	Rank P	Rank B	Rank M	Rank T_HH	Rank T_ENV	PBT	PMT	PBMT	Rank PBT	Rank PMT	Rank PBMT
Ranking	Climbazole	38083-17-9	0.255556	0.042838	1	0.520174	0.710782	6	6	1	5	4	0.382337	0.621628	0.50587	6	5	6
	Octanoic acid	102731-54-4	0.874468	0.226015	0.720752	0.726714	0.863176	1	5	3	1	3	0.672593	0.796278	0.682225	3	1	2
	Caprylylglycine	14246-53-8	0.839917	0.37115	0.565808	0.563636	0.951654	2	3	5	4	2	0.681589	0.730254	0.658433	2	2	3
	Shikimic acid	138-59-0	0.798559	0.786226	0.31163	0.620478	0.966665	3	1	6	3	1	0.792982	0.674333	0.696712	1	4	1
	Ciclopirox olamine	41621-49-2	0.555428	0.386484	0.828691	0.712979	0.619197	5	2	2	2	6	0.568522	0.679074	0.620556	4	3	4
	Hexamidine Diisethionate	659-40-5	0.600048	0.24564	0.645891	0.459671	0.693121	4	4	4	6	5	0.49962	0.599683	0.528874	5	6	5
RISK SEEKING SCENARIO (TOXCITY DATA LOG-TRANSFORMED)
	Substance	CAS number	P						B		M	T
			BIOWIN 7	Biodegradability (experimental or BIOWIN 3 and 5)	Half-life sediment (days)	Half-life soil (days)	Half-life water (days)	Half-life air (days)	LogKow	LogBCF	LogKoc	Carcinogenicity	Mutagenicity	Teratogenicity	Skin sensitization	Skin irritation	Eye irritation	Acute tox. (oral) (log mg/kg bw/day)	STOT-RE (oral) (log mg/kg bw)	Androgen	Estrogen	Thyroid	Algae LC50 (log mg/L)	Daphnia LC50 (log mg/L)	Fish LC50 (log mg/L)	Daphnia NOEC - Chronic (mg/L)	Fish NOEC - Chronic (mg/L)
Raw data	Climbazole	38083-17-9	-1.19	0	157	753	7	-1.396	3.83	2.44	3.744	0.0714	0	1	0	0	0	2.60206	1	1	1	1	-1.46852	1.03743	0.70757	-0.69897	-1.85387
	Octanoic acid	102731-54-4	0.977	1	13	7	7	-1.559	3.33	1.41	2.14	0	0	1	1	0	1	3.97543	1	1	1	1	0.568202	1	1.26757	0.952308	-0.25649
	Caprylylglycine	14246-53-8	0.24	1	13	7	6	-1.316	2.052	1	1.25	0	0	1	0	0	1	4	1	1	0.8	1	1.3228	2	2	1.61805	0.049218
	Shikimic acid	138-59-0	1.35	1	73	16	10	-0.768	-1.5	-0.22	-0.21	0	0	1	0	0	1	3.30103	1	1	1	1	1.66276	2.06446	2	0.348305	1.4624
	Ciclopirox olamine	41621-49-2	0.0488	0	13	34	15	-0.585	0.52	1.6	2.76	0	0	1	0	1	1	3.37107	1	1	1	1	0.447158	1.51322	1.38382	0.0944385	-0.0300816
	Hexamidine Diisethionate	659-40-5	0.8025	0	43	25	12.5	-0.6765	4.47	0.75	1.71	0.1971	0.29	0.8	0	0	0	2.47712	1	1	0.75	1	-1.55909	-1.11976	0.988068	-0.89279	-0.500313
	Level 0 (worst)		min	0	max	max	max	max	max	max	-2	0	0	0	0	0	0	1	0	0	0	0	1e-06	1e-06	1e-06	1e-06	1e-06
	Level 1 (best)		1.5	1	0	0	0	0	-3	-1	max	1	1	1	1	1	1	max	1	1	1	1	max	max	max	max	max
Normalized data	Climbazole	38083-17-9	0	0	0	0	0.533333	1	0.085676	0	1	0.0714	0	1	0	0	0	0.650515	1	1	1	1	0.591364	0.872647	0.838446	0.695851	0.555603
	Octanoic acid	102731-54-4	0.805576	1	0.917197	0.990704	0.533333	1	0.15261	0.299419	0.720752	0	0	1	1	0	1	0.993858	1	1	1	1	0.857159	0.868006	0.908446	0.91261	0.76966
	Caprylylglycine	14246-53-8	0.531599	1	0.917197	0.990704	0.6	1	0.323695	0.418605	0.565808	0	0	1	0	0	1	1	1	1	0.8	1	0.955635	0.992007	1	1	0.810627
	Shikimic acid	138-59-0	0.944238	1	0.535032	0.978752	0.333333	1	0.799197	0.773256	0.31163	0	0	1	0	0	1	0.825257	1	1	1	1	1	1	1	0.833324	1
	Ciclopirox olamine	41621-49-2	0.46052	0	0.917197	0.954847	0	1	0.528782	0.244186	0.828691	0	0	1	0	1	1	0.842767	1	1	1	1	0.841363	0.931646	0.922977	0.8	0.8
	Hexamidine Diisethionate	659-40-5	0.740706	0	0.726115	0.966799	0.166667	1	0	0.491279	0.645891	0.1971	0.29	0.8	0	0	0	0.61928	1	1	0.75	1	0.579544	0.605154	0.873509	0.670409	0.736987
			P	B	M	T_HH	T_ENV	Rank P	Rank B	Rank M	Rank T_HH	Rank T_ENV	PBT	PMT	PBMT	Rank PBT	Rank PMT	Rank PBMT
Ranking	Climbazole	38083-17-9	0.255556	0.042838	1	0.520174	0.710782	6	6	1	5	5	0.382337	0.621628	0.50587	6	5	6
	Octanoic acid	102731-54-4	0.874468	0.226015	0.720752	0.726714	0.863176	1	5	3	1	3	0.672593	0.796278	0.682225	3	1	2
	Caprylylglycine	14246-53-8	0.839917	0.37115	0.565808	0.618182	0.951654	2	3	5	4	2	0.695225	0.74389	0.669342	2	2	3
	Shikimic acid	138-59-0	0.798559	0.786226	0.31163	0.620478	0.966665	3	1	6	3	1	0.792982	0.674333	0.696712	1	4	1
	Ciclopirox olamine	41621-49-2	0.555428	0.386484	0.828691	0.712979	0.859197	5	2	2	2	4	0.628522	0.739074	0.668556	4	3	4
	Hexamidine Diisethionate	659-40-5	0.600048	0.24564	0.645891	0.514216	0.693121	4	4	4	6	6	0.513256	0.613319	0.539783	5	6	5
RISK NEUTRAL SCENARIO (TOXCITY DATA LOG-TRANSFORMED)
	Substance	CAS number	P						B		M	T
			BIOWIN 7	Biodegradability (experimental or BIOWIN 3 and 5)	Half-life sediment (days)	Half-life soil (days)	Half-life water (days)	Half-life air (days)	LogKow	LogBCF	LogKoc	Carcinogenicity	Mutagenicity	Teratogenicity	Skin sensitization	Skin irritation	Eye irritation	Acute tox. (oral) (log mg/kg bw/day)	STOT-RE (oral) (log mg/kg bw)	Androgen	Estrogen	Thyroid	Algae LC50 (log mg/L)	Daphnia LC50 (log mg/L)	Fish LC50 (log mg/L)	Daphnia NOEC - Chronic (mg/L)	Fish NOEC - Chronic (mg/L)
Raw data	Climbazole	38083-17-9	-1.19	0	157	753	7	-1.396	3.83	2.44	3.744	0.0714	0	1	0	0	0	2.60206	1	1	1	1	-1.46852	1.03743	0.70757	-0.69897	-1.85387
	Octanoic acid	102731-54-4	0.977	1	13	7	7	-1.559	3.33	1.41	2.14	0	0	1	1	0	1	3.97543	1	1	1	1	0.568202	1	1.26757	0.952308	-0.25649
	Caprylylglycine	14246-53-8	0.24	1	13	7	6	-1.316	2.052	1	1.25	0	0	1	0	0	1	4	1	1	0.5	1	1.3228	2	2	1.61805	0.049218
	Shikimic acid	138-59-0	1.35	1	73	16	10	-0.768	-1.5	-0.22	-0.21	0	0	1	0	0	1	3.30103	1	1	1	1	1.66276	2.06446	2	0.348305	1.4624
	Ciclopirox olamine	41621-49-2	0.0488	0	13	34	15	-0.585	0.52	1.6	2.76	0	0	1	0	1	1	3.37107	1	1	1	1	0.447158	1.51322	1.38382	-2.19098	-2.2688
	Hexamidine Diisethionate	659-40-5	0.8025	0	43	25	12.5	-0.6765	4.47	0.75	1.71	0.1971	0.29	0.5	0	0	0	2.47712	1	1	0.75	1	-1.55909	-1.11976	0.988068	-0.89279	-0.500313
	Level 0 (worst)		min	0	max	max	max	max	max	max	-2	0	0	0	0	0	0	1	0	0	0	0	1e-06	1e-06	1e-06	1e-06	1e-06
	Level 1 (best)		1.5	1	0	0	0	0	-3	-1	max	1	1	1	1	1	1	max	1	1	1	1	max	max	max	max	max
Normalized data	Climbazole	38083-17-9	0	0	0	0	0.533333	1	0.085676	0	1	0.0714	0	1	0	0	0	0.650515	1	1	1	1	0.591364	0.872647	0.838446	0.695851	0.555603
	Octanoic acid	102731-54-4	0.805576	1	0.917197	0.990704	0.533333	1	0.15261	0.299419	0.720752	0	0	1	1	0	1	0.993858	1	1	1	1	0.857159	0.868006	0.908446	0.91261	0.76966
	Caprylylglycine	14246-53-8	0.531599	1	0.917197	0.990704	0.6	1	0.323695	0.418605	0.565808	0	0	1	0	0	1	1	1	1	0.5	1	0.955635	0.992007	1	1	0.810627
	Shikimic acid	138-59-0	0.944238	1	0.535032	0.978752	0.333333	1	0.799197	0.773256	0.31163	0	0	1	0	0	1	0.825257	1	1	1	1	1	1	1	0.833324	1
	Ciclopirox olamine	41621-49-2	0.46052	0	0.917197	0.954847	0	1	0.528782	0.244186	0.828691	0	0	1	0	1	1	0.842767	1	1	1	1	0.841363	0.931646	0.922977	0.5	0.5
	Hexamidine Diisethionate	659-40-5	0.740706	0	0.726115	0.966799	0.166667	1	0	0.491279	0.645891	0.1971	0.29	0.5	0	0	0	0.61928	1	1	0.75	1	0.579544	0.605154	0.873509	0.670409	0.736987
			P	B	M	T_HH	T_ENV	Rank P	Rank B	Rank M	Rank T_HH	Rank T_ENV	PBT	PMT	PBMT	Rank PBT	Rank PMT	Rank PBMT
Ranking	Climbazole	38083-17-9	0.255556	0.042838	1	0.520174	0.710782	6	6	1	5	5	0.382337	0.621628	0.50587	6	5	6
	Octanoic acid	102731-54-4	0.874468	0.226015	0.720752	0.726714	0.863176	1	5	3	1	3	0.672593	0.796278	0.682225	3	1	2
	Caprylylglycine	14246-53-8	0.839917	0.37115	0.565808	0.590909	0.951654	2	3	5	4	2	0.688407	0.737072	0.663887	2	2	3
	Shikimic acid	138-59-0	0.798559	0.786226	0.31163	0.620478	0.966665	3	1	6	3	1	0.792982	0.674333	0.696712	1	4	1
	Ciclopirox olamine	41621-49-2	0.555428	0.386484	0.828691	0.712979	0.739197	5	2	2	2	4	0.598522	0.709074	0.644556	4	3	4
	Hexamidine Diisethionate	659-40-5	0.600048	0.24564	0.645891	0.486944	0.693121	4	4	4	6	6	0.506438	0.606501	0.534329	5	6	5

## Sheet: Table S5.3A-1
Table S4-3A.1: Data used in the ELECTRE III approach to identify safer alternatives to Allura Red - Risk seeking scenario																															Concordance matrices
	Substance	CAS number	P						B		M	T
			BIOWIN 7	Biodegradability (experimental or BIOWIN 3 and 5)	Half-life sediment (days)	Half-life soil (days)	Half-life water (days)	Half-life air (days)	LogKow	LogBCF	LogKoc	Carcinogenicity	Mutagenicity	Teratogenicity	Skin sensitization	Skin irritation	Eye irritation	Acute tox. (oral) (log mg/kg bw/day)	STOT-RE (oral) (log mg/kg bw)	Androgen	Estrogen	Thyroid	Algae LC50 (log mg/L)	Daphnia LC50 (log mg/L)	Fish LC50 (log mg/L)	Daphnia NOEC (log mg/L)	Fish NOEC (log mg/L)				BIOWIN 7	Allura Red	Malvidin chloride	Beetroot red	Pigment Red 51	Pigment Red 68	Acid Red 180	Pigment Red 122		Biodegradability (experimental or BIOWIN 3 and 5)	Allura Red	Malvidin chloride	Beetroot red	Pigment Red 51	Pigment Red 68	Acid Red 180	Pigment Red 122		sediment half life
Raw data	Allura Red	25956-17-6	-0.778	0	541.667	120	60	1.45833	-1.283	0.742375	1.274	1	1	1	0.2	1	1	4.08308	0.2	1	1	1	2.44107	2	2	1.63649	1.87852				Allura Red	1	0	0	1	0.558621	0.651724	1		Allura Red	1	1	0	1	1	1	1		Allura Red
	Malvidin chloride	643-84-5	1.16	0	337.5	75	37.5	0.0249583	1.74	0.935	2.845	0.333333	1	1	0.2	1	0.2	3.30103	1	0.2	0.2	1	0.731589	1.89265	1.7648	1.45788	0.774517				Malvidin chloride	1	1	1	1	1	1	1		Malvidin chloride	1	1	0	1	1	1	1		Malvidin chloride
	Beetroot red (betanin)	7659-95-2	0.78	1	75	17.3333	8.66667	0.0113333	-2.95	-0.521	0.315	0.2	1	1	0.2	1	0.2	3.30103	1	0.2	0.2	0.2	3.73167	2.4216	3.73167	3.20952	3.73167				Beetroot red	1	0.689655	1	1	1	1	1		Beetroot red	1	1	1	1	1	1	1		Beetroot red
	Pigment Red 51	5850-87-3	-0.691	0	337.5	75	37.5	0.595833	2.9	1.40375	3.455	0	1	0	0	1	1	1.84445	0.2	1	1	1	2.36922	1.74507	1.66052	1.02531	1.15534				Pigment Red 51	1	0	0	1	0.858621	0.951724	1		Pigment Red 51	1	1	0	1	1	1	1		Pigment Red 51
	Pigment Red 68	5850-80-6	-0.36	0	541.667	120	60	0.5875	2.53	1.125	2.495	0.571429	0.777778	0.2	0	1	0.2	4.22225	1	1	1	1	2.66652	2.02531	2.10577	1.30535	1.48287				Pigment Red 68	1	0	0	1	1	1	1		Pigment Red 68	1	1	0	1	1	1	1		Pigment Red 68
	Acid Red 180	6408-26-0	-0.387	0	541.667	120	60	0.10625	3.91	2.12429	3.855	0.5	0	0.2	0.2	1	1	1.84445	0.2	1	0.5	1	-0.659556	0.170262	2	-1.04287	2.78533				Acid Red 180	1	0	0	1	1	1	1		Acid Red 180	1	1	0	1	1	1	1		Acid Red 180
	Pigment Red 122	980-26-7	-2.0103	0	541.667	120	60	0.0533333	2.2	1.00657	3.23	0.5	1	1	1	1	1	3.30103	1	1	1	1	2	2	2	1.79588	1				Pigment Red 122	0	0	0	0	0	0	1		Pigment Red 122	1	1	0	1	1	1	1		Pigment Red 122
	indifference		0.29	0.25	135.417	30	15	0.364583	1.7275	0.781071	1.46375	0.25	0.25	0.25	0.25	0.25	0.25	1.05556	0.25	0.25	0.25	0.25	2.43292	2.1054	2.43292	2.30238	2.43292
	preference		0.58	0.5	270.833	60	30	0.729167	3.455	1.56214	2.9275	0.5	0.5	0.5	0.5	0.5	0.5	2.11112	0.5	0.5	0.5	0.5	4.86583	4.2108	4.86583	4.60476	4.86583
	MAUT 0 - 1		1.16	1	541.667	120	60	1.45833	6.91	3.12429	5.855	1	1	1	1	1	1	4.22225	1	1	1	1	9.73167	8.4216	9.73167	9.20952	9.73167
	veto		0.87	0.75	406.25	90	45	1.09375	5.1825	2.34321	4.39125	0.75	0.75	0.75	0.75	0.75	0.75	3.16669	0.75	0.75	0.75	0.75	7.29875	6.3162	7.29875	6.90714	7.29875
																															Concordance index
																																Allura Red	Malvidin chloride	Beetroot red	Pigment Red 51	Pigment Red 68	Acid Red 180	Pigment Red 122
																															Allura Red	1	0.850241	0.720069	0.818409	0.933772	0.802402	0.863044
																															Malvidin chloride	0.85228	1	0.669549	0.945455	0.963636	0.96	0.927273
																															Beetroot red	0.909091	0.825786	1	0.727273	0.838758	0.738182	0.707162
																															Pigment Red 51	0.845455	0.898474	0.574834	1	0.940742	0.96878	0.904099
																															Pigment Red 68	0.850649	0.880129	0.595807	0.931562	1	0.971152	0.92995
																															Acid Red 180	0.714639	0.773632	0.503033	0.903583	0.883854	1	0.846039
																															Pigment Red 122	0.848485	0.91641	0.632848	0.91641	0.966667	0.966667	1
																															Discordance matrices
																															BIOWIN 7	Allura Red	Malvidin chloride	Beetroot red	Pigment Red 51	Pigment Red 68	Acid Red 180	Pigment Red 122		Biodegradability (experimental or BIOWIN 3 and 5)	Allura Red	Malvidin chloride	Beetroot red	Pigment Red 51	Pigment Red 68	Acid Red 180	Pigment Red 122		sediment half life
																															Allura Red	0	1	1	0	0	0	0		Allura Red	0	0	1	0	0	0	0		Allura Red
																															Malvidin chloride	0	0	0	0	0	0	0		Malvidin chloride	0	0	1	0	0	0	0		Malvidin chloride
																															Beetroot red	0	0	0	0	0	0	0		Beetroot red	0	0	0	0	0	0	0		Beetroot red
																															Pigment Red 51	0	1	1	0	0	0	0		Pigment Red 51	0	0	1	0	0	0	0		Pigment Red 51
																															Pigment Red 68	0	1	1	0	0	0	0		Pigment Red 68	0	0	1	0	0	0	0		Pigment Red 68
																															Acid Red 180	0	1	1	0	0	0	0		Acid Red 180	0	0	1	0	0	0	0		Acid Red 180
																															Pigment Red 122	1	1	1	1	1	1	0		Pigment Red 122	0	0	1	0	0	0	0		Pigment Red 122
																															Tj (a;b)
																															BIOWIN 7	Allura Red	Malvidin chloride	Beetroot red	Pigment Red 51	Pigment Red 68	Acid Red 180	Pigment Red 122		Biodegradability (experimental or BIOWIN 3 and 5)	Allura Red	Malvidin chloride	Beetroot red	Pigment Red 51	Pigment Red 68	Acid Red 180	Pigment Red 122		sediment half life
																															Allura Red	1	0	0	1	1	1	1		Allura Red	1	1	0	1	1	1	1		Allura Red
																															Malvidin chloride	1	1	1	1	1	1	1		Malvidin chloride	1	1	0	1	1	1	1		Malvidin chloride
																															Beetroot red	1	1	1	1	1	1	1		Beetroot red	1	1	1	1	1	1	1		Beetroot red
																															Pigment Red 51	1	0	0	1	1	1	1		Pigment Red 51	1	1	0	1	1	1	1		Pigment Red 51
																															Pigment Red 68	1	0	0	1	1	1	1		Pigment Red 68	1	1	0	1	1	1	1		Pigment Red 68
																															Acid Red 180	1	0	0	1	1	1	1		Acid Red 180	1	1	0	1	1	1	1		Acid Red 180
																															Pigment Red 122	0	0	0	0	0	0	1		Pigment Red 122	1	1	0	1	1	1	1		Pigment Red 122
																															S(a;b)
																																Allura Red	Malvidin chloride	Beetroot red	Pigment Red 51	Pigment Red 68	Acid Red 180	Pigment Red 122
																															Allura Red		0	0	1	0	0	0	1
																															Malvidin chloride	0		0	0	0	0	0	0
																															Beetroot red	0	0		0	0	0	0	0
																															Pigment Red 51	0	0	0		0	1	0	1
																															Pigment Red 68	0	0	0	0		0	0	0
																															Acid Red 180	0	0	0	0	0		0	0
																															Pigment Red 122	0	0	0	0	0	0		0
																																0	0	0	1	0	1	0
																															lambda	1
																															g(lambda)	0.15
																															T(a;b)
																																Allura Red	Malvidin chloride	Beetroot red	Pigment Red 51	Pigment Red 68	Acid Red 180	Pigment Red 122
																															Allura Red		0	0	1	0	0	0	1
																															Malvidin chloride	0		0	0	0	0	0	0
																															Beetroot red	0	0		0	0	0	0	0
																															Pigment Red 51	0	0	0		0	1	0	1
																															Pigment Red 68	0	0	0	0		0	0	0
																															Acid Red 180	0	0	0	0	0		0	0
																															Pigment Red 122	0	0	0	0	0	0		0
																																0	0	0	1	0	1	0
																																raw	rank	defuzzied
																															Allura Red	1	1	1	1
																															Malvidin chloride	0	2	0	2
																															Beetroot red	0	2	0	2
																															Pigment Red 51	-1	6	0	2
																															Pigment Red 68	0	2	0	2
																															Acid Red 180	-1	6	-1	7
																															Pigment Red 122	0	2	0	2
[truncated: 183 more columns]

## Sheet: Table S5.3A-2
Table S4-3A.2: Data used in the ELECTRE III approach to identify safer alternatives to Allura Red - Risk neutral scenario																															Concordance matrices
	Substance	CAS number	P						B		M	T
			BIOWIN 7	Biodegradability (experimental or BIOWIN 3 and 5)	Half-life sediment (days)	Half-life soil (days)	Half-life water (days)	Half-life air (days)	LogKow	LogBCF	LogKoc	Carcinogenicity	Mutagenicity	Teratogenicity	Skin sensitization	Skin irritation	Eye irritation	Acute tox. (oral) (log mg/kg bw/day)	STOT-RE (oral) (log mg/kg bw)	Androgen	Estrogen	Thyroid	Algae LC50 (log mg/L)	Daphnia LC50 (log mg/L)	Fish LC50 (log mg/L)	Daphnia NOEC (log mg/L)	Fish NOEC (log mg/L)				BIOWIN 7	Allura Red	Malvidin chloride	Beetroot red	Pigment Red 51	Pigment Red 68	Acid Red 180	Pigment Red 122		Biodegradability (experimental or BIOWIN 3 and 5)	Allura Red	Malvidin chloride	Beetroot red	Pigment Red 51	Pigment Red 68	Acid Red 180	Pigment Red 122		sediment half life
Raw data	Allura Red	25956-17-6	-0.778	0	541.667	120	60	1.45833	-1.283	0.742375	1.274	1	1	1	0.5	1	1	4.08308	0.5	1	1	1	2.44107	2	2	1.63649	1.87852				Allura Red	1	0	0	1	0.558621	0.651724	1		Allura Red	1	1	0	1	1	1	1		Allura Red
	Malvidin chloride	643-84-5	1.16	0	337.5	75	37.5	0.0249583	1.74	0.935	2.845	0.333333	1	1	0.5	1	0.5	3.30103	1	0.5	0.5	1	0.731589	1.89265	1.7648	1.45788	0.774517				Malvidin chloride	1	1	1	1	1	1	1		Malvidin chloride	1	1	0	1	1	1	1		Malvidin chloride
	Beetroot red (betanin)	7659-95-2	0.78	1	75	17.3333	8.66667	0.0113333	-2.95	-0.521	0.315	0.5	1	1	0.5	1	0.5	3.30103	1	0.5	0.5	0.5	3.73167	2.4216	3.73167	3.20952	3.73167				Beetroot red	1	0.689655	1	1	1	1	1		Beetroot red	1	1	1	1	1	1	1		Beetroot red
	Pigment Red 51	5850-87-3	-0.691	0	337.5	75	37.5	0.595833	2.9	1.40375	3.455	0	1	0	0	1	1	3.11112	0.5	1	1	1	2.36922	1.74507	1.66052	1.02531	1.15534				Pigment Red 51	1	0	0	1	0.858621	0.951724	1		Pigment Red 51	1	1	0	1	1	1	1		Pigment Red 51
	Pigment Red 68	5850-80-6	-0.36	0	541.667	120	60	0.5875	2.53	1.125	2.495	0.571429	0.777778	0.5	0	1	0.5	4.22225	1	1	1	1	2.66652	2.02531	2.10577	1.30535	1.48287				Pigment Red 68	1	0	0	1	1	1	1		Pigment Red 68	1	1	0	1	1	1	1		Pigment Red 68
	Acid Red 180	6408-26-0	-0.387	0	541.667	120	60	0.10625	3.91	2.12429	3.855	0.5	0	0.5	0.5	1	1	3.11112	0.5	1	0.5	1	-0.659556	0.170262	2	-1.04287	2.78533				Acid Red 180	1	0	0	1	1	1	1		Acid Red 180	1	1	0	1	1	1	1		Acid Red 180
	Pigment Red 122	980-26-7	-2.0103	0	541.667	120	60	0.0533333	2.2	1.00657	3.23	0.5	1	1	1	1	1	3.30103	1	1	1	1	2	2	2	1.79588	1				Pigment Red 122	0	0	0	0	0	0	1		Pigment Red 122	1	1	0	1	1	1	1		Pigment Red 122
	indifference		0.29	0.25	135.417	30	15	0.364583	1.7275	0.781071	1.46375	0.25	0.25	0.25	0.25	0.25	0.25	1.05556	0.25	0.25	0.25	0.25	2.43292	2.1054	2.43292	2.30238	2.43292
	preference		0.58	0.5	270.833	60	30	0.729167	3.455	1.56214	2.9275	0.5	0.5	0.5	0.5	0.5	0.5	2.11112	0.5	0.5	0.5	0.5	4.86583	4.2108	4.86583	4.60476	4.86583
	MAUT 0 - 1		1.16	1	541.667	120	60	1.45833	6.91	3.12429	5.855	1	1	1	1	1	1	4.22225	1	1	1	1	9.73167	8.4216	9.73167	9.20952	9.73167
	veto		0.87	0.75	406.25	90	45	1.09375	5.1825	2.34321	4.39125	0.75	0.75	0.75	0.75	0.75	0.75	3.16669	0.75	0.75	0.75	0.75	7.29875	6.3162	7.29875	6.90714	7.29875
																															Concordance index
																																Allura Red	Malvidin chloride	Beetroot red	Pigment Red 51	Pigment Red 68	Acid Red 180	Pigment Red 122
																															Allura Red	1	0.850241	0.720069	0.818409	0.933772	0.802402	0.863044
																															Malvidin chloride	0.85228	1	0.669549	0.945455	0.963636	0.963636	0.927273
																															Beetroot red	0.909091	0.825786	1	0.727273	0.847589	0.745455	0.710799
																															Pigment Red 51	0.845455	0.8872	0.545378	1	0.939785	0.932417	0.911006
																															Pigment Red 68	0.832468	0.861948	0.577625	0.931562	1	0.95297	0.92995
																															Acid Red 180	0.73282	0.78054	0.50994	0.903583	0.901079	1	0.852946
																															Pigment Red 122	0.848485	0.91641	0.632848	0.91641	0.966667	0.966667	1
																															Discordance matrices
																															BIOWIN 7	Allura Red	Malvidin chloride	Beetroot red	Pigment Red 51	Pigment Red 68	Acid Red 180	Pigment Red 122		Biodegradability (experimental or BIOWIN 3 and 5)	Allura Red	Malvidin chloride	Beetroot red	Pigment Red 51	Pigment Red 68	Acid Red 180	Pigment Red 122		sediment half life
																															Allura Red	0	1	1	0	0	0	0		Allura Red	0	0	1	0	0	0	0		Allura Red
																															Malvidin chloride	0	0	0	0	0	0	0		Malvidin chloride	0	0	1	0	0	0	0		Malvidin chloride
																															Beetroot red	0	0	0	0	0	0	0		Beetroot red	0	0	0	0	0	0	0		Beetroot red
																															Pigment Red 51	0	1	1	0	0	0	0		Pigment Red 51	0	0	1	0	0	0	0		Pigment Red 51
																															Pigment Red 68	0	1	1	0	0	0	0		Pigment Red 68	0	0	1	0	0	0	0		Pigment Red 68
																															Acid Red 180	0	1	1	0	0	0	0		Acid Red 180	0	0	1	0	0	0	0		Acid Red 180
																															Pigment Red 122	1	1	1	1	1	1	0		Pigment Red 122	0	0	1	0	0	0	0		Pigment Red 122
																															Tj (a;b)
																															BIOWIN 7	Allura Red	Malvidin chloride	Beetroot red	Pigment Red 51	Pigment Red 68	Acid Red 180	Pigment Red 122		Biodegradability (experimental or BIOWIN 3 and 5)	Allura Red	Malvidin chloride	Beetroot red	Pigment Red 51	Pigment Red 68	Acid Red 180	Pigment Red 122		sediment half life
																															Allura Red	1	0	0	1	1	1	1		Allura Red	1	1	0	1	1	1	1		Allura Red
																															Malvidin chloride	1	1	1	1	1	1	1		Malvidin chloride	1	1	0	1	1	1	1		Malvidin chloride
																															Beetroot red	1	1	1	1	1	1	1		Beetroot red	1	1	1	1	1	1	1		Beetroot red
																															Pigment Red 51	1	0	0	1	1	1	1		Pigment Red 51	1	1	0	1	1	1	1		Pigment Red 51
																															Pigment Red 68	1	0	0	1	1	1	1		Pigment Red 68	1	1	0	1	1	1	1		Pigment Red 68
																															Acid Red 180	1	0	0	1	1	1	1		Acid Red 180	1	1	0	1	1	1	1		Acid Red 180
																															Pigment Red 122	0	0	0	0	0	0	1		Pigment Red 122	1	1	0	1	1	1	1		Pigment Red 122
																															S(a;b)
																																Allura Red	Malvidin chloride	Beetroot red	Pigment Red 51	Pigment Red 68	Acid Red 180	Pigment Red 122
																															Allura Red		0	0	1	1	0	0	2
																															Malvidin chloride	1		0	1	1	1	1	5
																															Beetroot red	1	1		1	1	1	1	6
																															Pigment Red 51	0	0	0		1	1	0	2
																															Pigment Red 68	1	0	0	1		1	0	3
																															Acid Red 180	0	0	0	0	0		0	0
																															Pigment Red 122	0	0	0	0	0	0		0
																																3	1	0	4	4	4	2
																															lambda	1
																															g(lambda)	0.15
																															T(a;b)
																																Allura Red	Malvidin chloride	Beetroot red	Pigment Red 51	Pigment Red 68	Acid Red 180	Pigment Red 122
																															Allura Red		0	0	1	1	0	0	2
																															Malvidin chloride	1		0	1	1	1	1	5
																															Beetroot red	1	1		1	1	1	1	6
																															Pigment Red 51	0	0	0		1	1	0	2
																															Pigment Red 68	1	0	0	1		1	0	3
																															Acid Red 180	0	0	0	0	0		0	0
																															Pigment Red 122	0	0	0	0	0	0		0
																																3	1	0	4	4	4	2
																																raw	rank	defuzzied
																															Allura Red	-1	3	-1	3
																															Malvidin chloride	4	2	4	2
																															Beetroot red	6	1	6	1
																															Pigment Red 51	-1	3	-2	5
																															Pigment Red 68	-1	3	-1	3
																															Acid Red 180	-4	7	-4	7
																															Pigment Red 122	-2	6	-2	5
[truncated: 183 more columns]

## Sheet: Table S5.3A-3
Table S4-3A.3: Data used in the ELECTRE III approach to identify safer alternatives to Allura Red - Risk averse scenario																															Concordance matrices
	Substance	CAS number	P						B		M	T
			BIOWIN 7	Biodegradability (experimental or BIOWIN 3 and 5)	Half-life sediment (days)	Half-life soil (days)	Half-life water (days)	Half-life air (days)	LogKow	LogBCF	LogKoc	Carcinogenicity	Mutagenicity	Teratogenicity	Skin sensitization	Skin irritation	Eye irritation	Acute tox. (oral) (log mg/kg bw/day)	STOT-RE (oral) (log mg/kg bw)	Androgen	Estrogen	Thyroid	Algae LC50 (log mg/L)	Daphnia LC50 (log mg/L)	Fish LC50 (log mg/L)	Daphnia NOEC (log mg/L)	Fish NOEC (log mg/L)				BIOWIN 7	Allura Red	Malvidin chloride	Beetroot red	Pigment Red 51	Pigment Red 68	Acid Red 180	Pigment Red 122		Biodegradability (experimental or BIOWIN 3 and 5)	Allura Red	Malvidin chloride	Beetroot red	Pigment Red 51	Pigment Red 68	Acid Red 180	Pigment Red 122		sediment half life
Raw data	Allura Red	25956-17-6	-0.778	0	541.667	120	60	1.45833	-1.283	0.742375	1.274	1	1	1	0.8	1	1	4.08308	0.8	1	1	1	2.44107	2	2	1.63649	1.87852				Allura Red	1	0	0	1	0.558621	0.651724	1		Allura Red	1	1	0	1	1	1	1		Allura Red
	Malvidin chloride	643-84-5	1.16	0	337.5	75	37.5	0.0249583	1.74	0.935	2.845	0.333333	1	1	0.8	1	0.8	3.30103	1	0.8	0.8	1	0.731589	1.89265	1.7648	1.45788	0.774517				Malvidin chloride	1	1	1	1	1	1	1		Malvidin chloride	1	1	0	1	1	1	1		Malvidin chloride
	Beetroot red (betanin)	7659-95-2	0.78	1	75	17.3333	8.66667	0.0113333	-2.95	-0.521	0.315	0.8	1	1	0.8	1	0.8	3.30103	1	0.8	0.8	0.8	3.73167	2.4216	3.73167	3.20952	3.73167				Beetroot red	1	0.689655	1	1	1	1	1		Beetroot red	1	1	1	1	1	1	1		Beetroot red
	Pigment Red 51	5850-87-3	-0.691	0	337.5	75	37.5	0.595833	2.9	1.40375	3.455	0	1	0	0	1	1	4.3778	0.8	1	1	1	2.36922	1.74507	1.66052	1.02531	1.15534				Pigment Red 51	1	0	0	1	0.858621	0.951724	1		Pigment Red 51	1	1	0	1	1	1	1		Pigment Red 51
	Pigment Red 68	5850-80-6	-0.36	0	541.667	120	60	0.5875	2.53	1.125	2.495	0.571429	0.777778	0.8	0	1	0.8	4.22225	1	1	1	1	2.66652	2.02531	2.10577	1.30535	1.48287				Pigment Red 68	1	0	0	1	1	1	1		Pigment Red 68	1	1	0	1	1	1	1		Pigment Red 68
	Acid Red 180	6408-26-0	-0.387	0	541.667	120	60	0.10625	3.91	2.12429	3.855	0.5	0	0.8	0.8	1	1	4.3778	0.8	1	0.5	1	-0.659556	0.170262	2	-1.04287	2.78533				Acid Red 180	1	0	0	1	1	1	1		Acid Red 180	1	1	0	1	1	1	1		Acid Red 180
	Pigment Red 122	980-26-7	-2.0103	0	541.667	120	60	0.0533333	2.2	1.00657	3.23	0.5	1	1	1	1	1	3.30103	1	1	1	1	2	2	2	1.79588	1				Pigment Red 122	0	0	0	0	0	0	1		Pigment Red 122	1	1	0	1	1	1	1		Pigment Red 122
	indifference		0.29	0.25	135.417	30	15	0.364583	1.7275	0.781071	1.46375	0.25	0.25	0.25	0.25	0.25	0.25	1.09445	0.25	0.25	0.25	0.25	2.43292	2.1054	2.43292	2.30238	2.43292
	preference		0.58	0.5	270.833	60	30	0.729167	3.455	1.56214	2.9275	0.5	0.5	0.5	0.5	0.5	0.5	2.1889	0.5	0.5	0.5	0.5	4.86583	4.2108	4.86583	4.60476	4.86583
	MAUT 0 - 1		1.16	1	541.667	120	60	1.45833	6.91	3.12429	5.855	1	1	1	1	1	1	4.3778	1	1	1	1	9.73167	8.4216	9.73167	9.20952	9.73167
	veto		0.87	0.75	406.25	90	45	1.09375	5.1825	2.34321	4.39125	0.75	0.75	0.75	0.75	0.75	0.75	3.28335	0.75	0.75	0.75	0.75	7.29875	6.3162	7.29875	6.90714	7.29875
																															Concordance index
																																Allura Red	Malvidin chloride	Beetroot red	Pigment Red 51	Pigment Red 68	Acid Red 180	Pigment Red 122
																															Allura Red	1	0.868423	0.738251	0.818409	0.951954	0.802402	0.899408
																															Malvidin chloride	0.906825	1	0.653791	1	1	1	1
																															Beetroot red	1	0.843968	1	0.8	0.902135	0.8	0.801708
																															Pigment Red 51	0.845455	0.905381	0.56356	1	0.958924	0.932417	0.929188
																															Pigment Red 68	0.868831	0.880129	0.595807	0.949744	1	0.971152	0.966313
																															Acid Red 180	0.751002	0.813267	0.539031	0.903583	0.920218	1	0.907491
																															Pigment Red 122	0.848485	0.91641	0.629211	0.91641	0.966667	0.966667	1
																															Discordance matrices
																															BIOWIN 7	Allura Red	Malvidin chloride	Beetroot red	Pigment Red 51	Pigment Red 68	Acid Red 180	Pigment Red 122		Biodegradability (experimental or BIOWIN 3 and 5)	Allura Red	Malvidin chloride	Beetroot red	Pigment Red 51	Pigment Red 68	Acid Red 180	Pigment Red 122		sediment half life
																															Allura Red	0	1	1	0	0	0	0		Allura Red	0	0	1	0	0	0	0		Allura Red
																															Malvidin chloride	0	0	0	0	0	0	0		Malvidin chloride	0	0	1	0	0	0	0		Malvidin chloride
																															Beetroot red	0	0	0	0	0	0	0		Beetroot red	0	0	0	0	0	0	0		Beetroot red
																															Pigment Red 51	0	1	1	0	0	0	0		Pigment Red 51	0	0	1	0	0	0	0		Pigment Red 51
																															Pigment Red 68	0	1	1	0	0	0	0		Pigment Red 68	0	0	1	0	0	0	0		Pigment Red 68
																															Acid Red 180	0	1	1	0	0	0	0		Acid Red 180	0	0	1	0	0	0	0		Acid Red 180
																															Pigment Red 122	1	1	1	1	1	1	0		Pigment Red 122	0	0	1	0	0	0	0		Pigment Red 122
																															Tj (a;b)
																															BIOWIN 7	Allura Red	Malvidin chloride	Beetroot red	Pigment Red 51	Pigment Red 68	Acid Red 180	Pigment Red 122		Biodegradability (experimental or BIOWIN 3 and 5)	Allura Red	Malvidin chloride	Beetroot red	Pigment Red 51	Pigment Red 68	Acid Red 180	Pigment Red 122		sediment half life
																															Allura Red	1	0	0	1	1	1	1		Allura Red	1	1	0	1	1	1	1		Allura Red
																															Malvidin chloride	1	1	1	1	1	1	1		Malvidin chloride	1	1	0	1	1	1	1		Malvidin chloride
																															Beetroot red	1	1	1	1	1	1	1		Beetroot red	1	1	1	1	1	1	1		Beetroot red
																															Pigment Red 51	1	0	0	1	1	1	1		Pigment Red 51	1	1	0	1	1	1	1		Pigment Red 51
																															Pigment Red 68	1	0	0	1	1	1	1		Pigment Red 68	1	1	0	1	1	1	1		Pigment Red 68
																															Acid Red 180	1	0	0	1	1	1	1		Acid Red 180	1	1	0	1	1	1	1		Acid Red 180
																															Pigment Red 122	0	0	0	0	0	0	1		Pigment Red 122	1	1	0	1	1	1	1		Pigment Red 122
																															S(a;b)
																																Allura Red	Malvidin chloride	Beetroot red	Pigment Red 51	Pigment Red 68	Acid Red 180	Pigment Red 122
																															Allura Red		0	0	1	1	0	0	2
																															Malvidin chloride	1		0	1	1	1	1	5
																															Beetroot red	1	1		1	1	1	1	6
																															Pigment Red 51	0	0	0		0	0	0	0
																															Pigment Red 68	0	0	0	1		0	0	1
																															Acid Red 180	0	0	0	0	0		0	0
																															Pigment Red 122	0	0	0	0	0	0		0
																																2	1	0	4	3	2	2
																															lambda	1
																															g(lambda)	0.15
																															T(a;b)
																																Allura Red	Malvidin chloride	Beetroot red	Pigment Red 51	Pigment Red 68	Acid Red 180	Pigment Red 122
																															Allura Red		0	0	1	1	0	0	2
																															Malvidin chloride	1		0	1	1	1	1	5
																															Beetroot red	1	1		1	1	1	1	6
																															Pigment Red 51	0	0	0		0	0	0	0
																															Pigment Red 68	0	0	0	1		0	0	1
																															Acid Red 180	0	0	0	0	0		0	0
																															Pigment Red 122	0	0	0	0	0	0		0
																																2	1	0	4	3	2	2
																																raw	rank	defuzzied
																															Allura Red	0	3	0	3
																															Malvidin chloride	4	2	4	2
																															Beetroot red	6	1	6	1
																															Pigment Red 51	-3	7	-4	7
																															Pigment Red 68	-2	4	-2	4
																															Acid Red 180	-2	4	-2	4
																															Pigment Red 122	-2	4	-2	4
[truncated: 183 more columns]

## Sheet: Table S5.3B-1
Table S4-3B.1: Data used in the ELECTRE III approach to identify safer alternatives to Benzophenone-4 - Risk seeking scenario																															Concordance matrices
	Substance	CAS number	P						B		M	T
			BIOWIN 7	Biodegradability (experimental or BIOWIN 3 and 5)	Half-life sediment (days)	Half-life soil (days)	Half-life water (days)	Half-life air (days)	LogKow	LogBCF	LogKoc	Carcinogenicity	Mutagenicity	Teratogenicity	Skin sensitization	Skin irritation	Eye irritation	Acute tox. (oral) (log mg/kg bw/day)	Acute tox. (dermal) (log mg/kg bw/day)	STOT-RE (oral) (log mg/kg bw)	Androgen	Estrogen	Thyroid	Algae LC50 (log mg/L)	Daphnia LC50 (log mg/L)	Fish LC50 (log mg/L)	Daphnia NOEC - Chronic (mg/L)	Fish NOEC - Chronic (mg/L)			BIOWIN 7	Benzophenone-4	Ensulizole	Benzylidene Camphor Sulfonic Acid	Bisdisulizole disodium	Bemotrizinol	Bornelone	Phenylemenis-Diphenyltriazine		Biodegradability (experimental or BIOWIN 3 and 5)	Benzophenone-4	Ensulizole	Benzylidene Camphor Sulfonic Acid	Bisdisulizole disodium	Bemotrizinol	Bornelone	Phenylemenis-Diphenyltriazine		sediment half life
Raw data	Benzophenone-4	4065-45-6	-0.2	1	341.66	75	37.5	0.143	0.515	0.14	0.992	0.928571	1	1	0	0	0.5	3.54777	3.69897	1	0.75	0.888889	1	2.03961	1	2.61909	2.4133	0.68993			Benzophenone-4	1	0	1	1	1	1	1		Benzophenone-4	1	1	1	1	1	1	1		Benzophenone-4
	Ensulizole	27503-81-7	-0.09	0	135	30	15	0.883	-1.42	-0.09	1.975	0.941176	1	1	1	1	1	3.81954	3.47712	1	1	1	1	2	3	4	0.795185	0.980458			Ensulizole	1	1	1	1	1	1	1		Ensulizole	0	1	1	1	1	1	1		Ensulizole
	Benzylidene Camphor Sulfonic Acid	56039-58-8	-1.5	0	541.66	120	60	0.05	2.22	1.05	2.353	1	1	1	0.2	1	0.2	1.76391	1.86021	0.2	1	0.2	1	2.93197	3.27875	2.71265	2.34635	2.78533			Benzylidene Camphor Sulfonic Acid	0	0	1	0	0	0	0		Benzylidene Camphor Sulfonic Acid	0	1	1	1	1	1	1		Benzylidene Camphor Sulfonic Acid
	Bisdisulizole disodium	180898-37-7	-1.43	0	337.5	75	37.5	1.608	-2.4	-0.38	3.788	1	1	1	1	1	1	3.30103	4.30103	1	1	0.666667	1	1.94547	1.98498	1.95424	-0.500313	2.17319			Bisdisulizole disodium	0	0	1	1	0	0	0		Bisdisulizole disodium	0	1	1	1	1	1	1		Bisdisulizole disodium
	Bemotrizinol	187393-00-6	-0.61	0	541.666	120	60	0.043	5.7	0.19	8.195	0.647059	1	1	1	1	1	3.30103	3.30103	1	1	0.8	1	-1.76955	2.57978	2.30103	-0.154902	2.30103			Bemotrizinol	0	0	1	1	1	1	0.666667		Bemotrizinol	0	1	1	1	1	1	1		Bemotrizinol
	Bornelone	2226-11-1	-0.63	0	337.5	75	37.5	0.0345	4.26	2.95	3.305	0.736842	0.948276	0.75	0.8	1	0.2	3.35562	2.72428	0	1	1	1	2.06314	1.43177	0.715167	-0.49485	-0.343902			Bornelone	0	0	1	1	1	1	0		Bornelone	0	1	1	1	1	1	1		Bornelone
	Phenylemenis-Diphenyltriazine	55514-22-2	-0.58	0	433.333	96	48	1.2864	10.5	3.76	7.115	0.75	1	1	1	1	1	3.30103	3.30103	1	1	0.833333	1	-4.21361	-4.14425	-1.13077	-4.31734	-4.24293			Phenylemenis-Diphenyltriazine	0	0	1	1	1	1	1		Phenylemenis-Diphenyltriazine	0	1	1	1	1	1	1		Phenylemenis-Diphenyltriazine
	indifference		0.0225	0.25	135.417	30	15	0.402	3.375	1.19	2.54875	0.25	0.25	0.25	0.25	0.25	0.25	0.954886	1.07526	0.25	0.25	0.25	0.25	2.23299	2.31969	2.5	2.10332	2.19633
	preference		0.045	0.5	270.833	60	30	0.804	6.75	2.38	5.0975	0.5	0.5	0.5	0.5	0.5	0.5	1.90977	2.15051	0.5	0.5	0.5	0.5	4.46598	4.63938	5	4.20665	4.39266
	MAUT 0 - 1		0.09	1	541.666	120	60	1.608	13.5	4.76	10.195	1	1	1	1	1	1	3.81954	4.30103	1	1	1	1	8.93197	9.27875	10	8.4133	8.78533
	veto		0.0675	0.75	406.25	90	45	1.206	10.125	3.57	7.64625	0.75	0.75	0.75	0.75	0.75	0.75	2.86466	3.22577	0.75	0.75	0.75	0.75	6.69897	6.95907	7.5	6.30997	6.589
																															Concordance index
																																Benzophenone-4	Ensulizole	Benzylidene Camphor Sulfonic Acid	Bisdisulizole disodium	Bemotrizinol	Bornelone	Phenylemenis-Diphenyltriazine
																															Benzophenone-4	1	0.865796	0.983333	0.930598	0.75	0.966667	0.75
																															Ensulizole	0.93864	1	0.966667	1	0.766667	0.966667	0.8
																															Benzylidene Camphor Sulfonic Acid	0.821132	0.767086	1	0.768081	0.684171	0.871963	0.710498
																															Bisdisulizole disodium	0.88459	0.884482	0.95253	1	0.787517	0.927778	0.905598
																															Bemotrizinol	0.791295	0.736201	0.942459	0.816333	1	0.921088	0.988889
																															Bornelone	0.787065	0.702633	0.908436	0.754841	0.674779	1	0.834363
																															Phenylemenis-Diphenyltriazine	0.520002	0.466551	0.585172	0.638049	0.686596	0.738074	1
																															Discordance matrices
																															BIOWIN 7	Benzophenone-4	Ensulizole	Benzylidene Camphor Sulfonic Acid	Bisdisulizole disodium	Bemotrizinol	Bornelone	Phenylemenis-Diphenyltriazine		Biodegradability (experimental or BIOWIN 3 and 5)	Benzophenone-4	Ensulizole	Benzylidene Camphor Sulfonic Acid	Bisdisulizole disodium	Bemotrizinol	Bornelone	Phenylemenis-Diphenyltriazine		sediment half life
																															Benzophenone-4	0	1	0	0	0	0	0		Benzophenone-4	0	0	0	0	0	0	0		Benzophenone-4
																															Ensulizole	0	0	0	0	0	0	0		Ensulizole	1	0	0	0	0	0	0		Ensulizole
																															Benzylidene Camphor Sulfonic Acid	1	1	0	1	1	1	1		Benzylidene Camphor Sulfonic Acid	1	0	0	0	0	0	0		Benzylidene Camphor Sulfonic Acid
																															Bisdisulizole disodium	1	1	0	0	1	1	1		Bisdisulizole disodium	1	0	0	0	0	0	0		Bisdisulizole disodium
																															Bemotrizinol	1	1	0	0	0	0	0		Bemotrizinol	1	0	0	0	0	0	0		Bemotrizinol
																															Bornelone	1	1	0	0	0	0	0.222222		Bornelone	1	0	0	0	0	0	0		Bornelone
																															Phenylemenis-Diphenyltriazine	1	1	0	0	0	0	0		Phenylemenis-Diphenyltriazine	1	0	0	0	0	0	0		Phenylemenis-Diphenyltriazine
																															Tj (a;b)
																															BIOWIN 7	Benzophenone-4	Ensulizole	Benzylidene Camphor Sulfonic Acid	Bisdisulizole disodium	Bemotrizinol	Bornelone	Phenylemenis-Diphenyltriazine		Biodegradability (experimental or BIOWIN 3 and 5)	Benzophenone-4	Ensulizole	Benzylidene Camphor Sulfonic Acid	Bisdisulizole disodium	Bemotrizinol	Bornelone	Phenylemenis-Diphenyltriazine		sediment half life
																															Benzophenone-4	1	0	1	1	1	1	1		Benzophenone-4	1	1	1	1	1	1	1		Benzophenone-4
																															Ensulizole	1	1	1	1	1	1	1		Ensulizole	0	1	1	1	1	1	1		Ensulizole
																															Benzylidene Camphor Sulfonic Acid	0	0	1	0	0	0	0		Benzylidene Camphor Sulfonic Acid	0	1	1	1	1	1	1		Benzylidene Camphor Sulfonic Acid
																															Bisdisulizole disodium	0	0	1	1	0	0	0		Bisdisulizole disodium	0	1	1	1	1	1	1		Bisdisulizole disodium
																															Bemotrizinol	0	0	1	1	1	1	1		Bemotrizinol	0	1	1	1	1	1	1		Bemotrizinol
																															Bornelone	0	0	1	1	1	1	1		Bornelone	0	1	1	1	1	1	1		Bornelone
																															Phenylemenis-Diphenyltriazine	0	0	1	1	1	1	1		Phenylemenis-Diphenyltriazine	0	1	1	1	1	1	1		Phenylemenis-Diphenyltriazine
																															S(a;b)
																																Benzophenone-4	Ensulizole	Benzylidene Camphor Sulfonic Acid	Bisdisulizole disodium	Bemotrizinol	Bornelone	Phenylemenis-Diphenyltriazine
																															Benzophenone-4		0	0	0	0	0	0	0
																															Ensulizole	0		1	1	1	1	1	5
																															Benzylidene Camphor Sulfonic Acid	0	0		0	0	0	0	0
																															Bisdisulizole disodium	0	0	0		0	0	0	0
																															Bemotrizinol	0	0	1	1		1	1	4
																															Bornelone	0	0	1	0	0		0	1
																															Phenylemenis-Diphenyltriazine	0	0	0	0	0	0		0
																																0	0	3	2	1	2	2
																															lambda	1
																															g(lambda)	0.15
																															T(a;b)
																																Benzophenone-4	Ensulizole	Benzylidene Camphor Sulfonic Acid	Bisdisulizole disodium	Bemotrizinol	Bornelone	Phenylemenis-Diphenyltriazine
																															Benzophenone-4		0	0	0	0	0	0	0
																															Ensulizole	0		1	1	1	1	1	5
																															Benzylidene Camphor Sulfonic Acid	0	0		0	0	0	0	0
																															Bisdisulizole disodium	0	0	0		0	0	0	0
																															Bemotrizinol	0	0	1	1		1	1	4
																															Bornelone	0	0	1	0	0		0	1
																															Phenylemenis-Diphenyltriazine	0	0	0	0	0	0		0
																																0	0	3	2	1	2	2
																																raw	rank	defuzzied
																															Benzophenone-4	0	4	0	3
																															Ensulizole	5	1	5	1
																															Benzylidene Camphor Sulfonic Acid	-3	7	-3	7
																															Bisdisulizole disodium	2	3	-2	5
																															Bemotrizinol	3	2	3	2
																															Bornelone	-1	5	-1	4
																															Phenylemenis-Diphenyltriazine	-2	6	-2	5
[truncated: 191 more columns]

## Sheet: Table S5.3B-2
Table S4-3B.2: Data used in the ELECTRE III approach to identify safer alternatives to Benzophenone-4 - Risk neutral scenario																															Concordance matrices
	Substance	CAS number	P						B		M	T
			BIOWIN 7	Biodegradability (experimental or BIOWIN 3 and 5)	Half-life sediment (days)	Half-life soil (days)	Half-life water (days)	Half-life air (days)	LogKow	LogBCF	LogKoc	Carcinogenicity	Mutagenicity	Teratogenicity	Skin sensitization	Skin irritation	Eye irritation	Acute tox. (oral) (log mg/kg bw/day)	Acute tox. (dermal) (log mg/kg bw/day)	STOT-RE (oral) (log mg/kg bw)	Androgen	Estrogen	Thyroid	Algae LC50 (log mg/L)	Daphnia LC50 (log mg/L)	Fish LC50 (log mg/L)	Daphnia NOEC - Chronic (mg/L)	Fish NOEC - Chronic (mg/L)			BIOWIN 7	Benzophenone-4	Ensulizole	Benzylidene Camphor Sulfonic Acid	Bisdisulizole disodium	Bemotrizinol	Bornelone	Phenylemenis-Diphenyltriazine		Biodegradability (experimental or BIOWIN 3 and 5)	Benzophenone-4	Ensulizole	Benzylidene Camphor Sulfonic Acid	Bisdisulizole disodium	Bemotrizinol	Bornelone	Phenylemenis-Diphenyltriazine		sediment half life
Raw data	Benzophenone-4	4065-45-6	-0.2	1	341.66	75	37.5	0.143	0.515	0.14	0.992	0.928571	1	1	0	0	0.5	3.54777	3.69897	1	0.75	0.888889	1	2.03961	1	2.61909	2.4133	0.68993			Benzophenone-4	1	0	1	1	1	1	1		Benzophenone-4	1	1	1	1	1	1	1		Benzophenone-4
	Ensulizole	27503-81-7	-0.09	0	135	30	15	0.883	-1.42	-0.09	1.975	0.941176	1	1	1	1	1	3.81954	3.47712	1	1	1	1	2	3	4	0.795185	0.980458			Ensulizole	1	1	1	1	1	1	1		Ensulizole	0	1	1	1	1	1	1		Ensulizole
	Benzylidene Camphor Sulfonic Acid	56039-58-8	-1.5	0	541.66	120	60	0.05	2.22	1.05	2.353	1	1	1	0.5	1	0.5	2.90977	3.15051	0.5	1	0.5	1	2.93197	3.27875	2.71265	2.34635	2.78533			Benzylidene Camphor Sulfonic Acid	0	0	1	0	0	0	0		Benzylidene Camphor Sulfonic Acid	0	1	1	1	1	1	1		Benzylidene Camphor Sulfonic Acid
	Bisdisulizole disodium	180898-37-7	-1.43	0	337.5	75	37.5	1.608	-2.4	-0.38	3.788	1	1	1	1	1	1	3.30103	4.30103	1	1	0.666667	1	1.94547	1.98498	1.95424	-0.500313	2.17319			Bisdisulizole disodium	0	0	1	1	0	0	0		Bisdisulizole disodium	0	1	1	1	1	1	1		Bisdisulizole disodium
	Bemotrizinol	187393-00-6	-0.61	0	541.666	120	60	0.043	5.7	0.19	8.195	0.647059	1	1	1	1	1	3.30103	3.30103	1	1	0.8	1	-1.76955	2.57978	2.30103	-0.154902	2.30103			Bemotrizinol	0	0	1	1	1	1	0.666667		Bemotrizinol	0	1	1	1	1	1	1		Bemotrizinol
	Bornelone	2226-11-1	-0.63	0	337.5	75	37.5	0.0345	4.26	2.95	3.305	0.736842	0.948276	0.75	0.8	1	0.5	3.35562	2.72428	0	1	1	1	2.06314	1.43177	0.715167	-0.49485	-0.343902			Bornelone	0	0	1	1	1	1	0		Bornelone	0	1	1	1	1	1	1		Bornelone
	Phenylemenis-Diphenyltriazine	55514-22-2	-0.58	0	270.833	60	30	0.804	10.5	3.76	7.115	0.75	1	1	1	1	1	3.30103	3.30103	1	1	0.833333	1	-1.53402	-1.36062	-1.13077	-1.79335	-1.60734			Phenylemenis-Diphenyltriazine	0	0	1	1	1	1	1		Phenylemenis-Diphenyltriazine	0	1	1	1	1	1	1		Phenylemenis-Diphenyltriazine
	indifference		0.0225	0.25	135.417	30	15	0.402	3.375	1.19	2.54875	0.25	0.25	0.25	0.25	0.25	0.25	0.954886	1.07526	0.25	0.25	0.25	0.25	2.23299	2.31969	2.5	2.10332	2.19633
	preference		0.045	0.5	270.833	60	30	0.804	6.75	2.38	5.0975	0.5	0.5	0.5	0.5	0.5	0.5	1.90977	2.15051	0.5	0.5	0.5	0.5	4.46598	4.63938	5	4.20665	4.39266
	MAUT 0 - 1		0.09	1	541.666	120	60	1.608	13.5	4.76	10.195	1	1	1	1	1	1	3.81954	4.30103	1	1	1	1	8.93197	9.27875	10	8.4133	8.78533
	veto		0.0675	0.75	406.25	90	45	1.206	10.125	3.57	7.64625	0.75	0.75	0.75	0.75	0.75	0.75	2.86466	3.22577	0.75	0.75	0.75	0.75	6.69897	6.95907	7.5	6.30997	6.589
																															Concordance index
																																Benzophenone-4	Ensulizole	Benzylidene Camphor Sulfonic Acid	Bisdisulizole disodium	Bemotrizinol	Bornelone	Phenylemenis-Diphenyltriazine
																															Benzophenone-4	1	0.850628	0.970588	0.93163	0.705882	0.970588	0.705882
																															Ensulizole	0.9233	1	0.958333	1	0.708333	0.958333	0.75
																															Benzylidene Camphor Sulfonic Acid	0.832252	0.764695	1	0.779047	0.661275	0.877868	0.567224
																															Bisdisulizole disodium	0.869335	0.857645	0.953136	1	0.734396	0.911765	0.84033
																															Bemotrizinol	0.772605	0.695619	0.972568	0.796364	1	0.926644	0.861111
																															Bornelone	0.75763	0.651627	0.898535	0.714141	0.612938	1	0.805209
																															Phenylemenis-Diphenyltriazine	0.607999	0.665979	0.647258	0.721239	0.757793	0.843817	1
																															Discordance matrices
																															BIOWIN 7	Benzophenone-4	Ensulizole	Benzylidene Camphor Sulfonic Acid	Bisdisulizole disodium	Bemotrizinol	Bornelone	Phenylemenis-Diphenyltriazine		Biodegradability (experimental or BIOWIN 3 and 5)	Benzophenone-4	Ensulizole	Benzylidene Camphor Sulfonic Acid	Bisdisulizole disodium	Bemotrizinol	Bornelone	Phenylemenis-Diphenyltriazine		sediment half life
																															Benzophenone-4	0	1	0	0	0	0	0		Benzophenone-4	0	0	0	0	0	0	0		Benzophenone-4
																															Ensulizole	0	0	0	0	0	0	0		Ensulizole	1	0	0	0	0	0	0		Ensulizole
																															Benzylidene Camphor Sulfonic Acid	1	1	0	1	1	1	1		Benzylidene Camphor Sulfonic Acid	1	0	0	0	0	0	0		Benzylidene Camphor Sulfonic Acid
																															Bisdisulizole disodium	1	1	0	0	1	1	1		Bisdisulizole disodium	1	0	0	0	0	0	0		Bisdisulizole disodium
																															Bemotrizinol	1	1	0	0	0	0	0		Bemotrizinol	1	0	0	0	0	0	0		Bemotrizinol
																															Bornelone	1	1	0	0	0	0	0.222222		Bornelone	1	0	0	0	0	0	0		Bornelone
																															Phenylemenis-Diphenyltriazine	1	1	0	0	0	0	0		Phenylemenis-Diphenyltriazine	1	0	0	0	0	0	0		Phenylemenis-Diphenyltriazine
																															Tj (a;b)
																															BIOWIN 7	Benzophenone-4	Ensulizole	Benzylidene Camphor Sulfonic Acid	Bisdisulizole disodium	Bemotrizinol	Bornelone	Phenylemenis-Diphenyltriazine		Biodegradability (experimental or BIOWIN 3 and 5)	Benzophenone-4	Ensulizole	Benzylidene Camphor Sulfonic Acid	Bisdisulizole disodium	Bemotrizinol	Bornelone	Phenylemenis-Diphenyltriazine		sediment half life
																															Benzophenone-4	1	0	1	1	1	1	1		Benzophenone-4	1	1	1	1	1	1	1		Benzophenone-4
																															Ensulizole	1	1	1	1	1	1	1		Ensulizole	0	1	1	1	1	1	1		Ensulizole
																															Benzylidene Camphor Sulfonic Acid	0	0	1	0	0	0	0		Benzylidene Camphor Sulfonic Acid	0	1	1	1	1	1	1		Benzylidene Camphor Sulfonic Acid
																															Bisdisulizole disodium	0	0	1	1	0	0	0		Bisdisulizole disodium	0	1	1	1	1	1	1		Bisdisulizole disodium
																															Bemotrizinol	0	0	1	1	1	1	1		Bemotrizinol	0	1	1	1	1	1	1		Bemotrizinol
																															Bornelone	0	0	1	1	1	1	1		Bornelone	0	1	1	1	1	1	1		Bornelone
																															Phenylemenis-Diphenyltriazine	0	0	1	1	1	1	1		Phenylemenis-Diphenyltriazine	0	1	1	1	1	1	1		Phenylemenis-Diphenyltriazine
																															S(a;b)
																																Benzophenone-4	Ensulizole	Benzylidene Camphor Sulfonic Acid	Bisdisulizole disodium	Bemotrizinol	Bornelone	Phenylemenis-Diphenyltriazine
																															Benzophenone-4		0	0	0	0	0	0	0
																															Ensulizole	0		1	1	1	1	1	5
																															Benzylidene Camphor Sulfonic Acid	0	0		0	0	0	0	0
																															Bisdisulizole disodium	0	0	0		0	0	0	0
																															Bemotrizinol	0	0	1	1		1	1	4
																															Bornelone	0	0	1	0	0		0	1
																															Phenylemenis-Diphenyltriazine	0	0	1	0	0	1		2
																																0	0	4	2	1	3	2
																															lambda	1
																															g(lambda)	0.15
																															T(a;b)
																																Benzophenone-4	Ensulizole	Benzylidene Camphor Sulfonic Acid	Bisdisulizole disodium	Bemotrizinol	Bornelone	Phenylemenis-Diphenyltriazine
																															Benzophenone-4		0	0	0	0	0	0	0
																															Ensulizole	0		1	1	1	1	1	5
																															Benzylidene Camphor Sulfonic Acid	0	0		0	0	0	0	0
																															Bisdisulizole disodium	0	0	0		0	0	0	0
																															Bemotrizinol	0	0	1	1		1	1	4
																															Bornelone	0	0	1	0	0		0	1
																															Phenylemenis-Diphenyltriazine	0	0	1	0	0	1		2
																																0	0	4	2	1	3	2
																																raw	rank	defuzzied
																															Benzophenone-4	0	4	0	3
																															Ensulizole	5	1	5	1
																															Benzylidene Camphor Sulfonic Acid	-4	7	-4	7
																															Bisdisulizole disodium	2	3	-2	5
																															Bemotrizinol	3	2	3	2
																															Bornelone	-2	6	-2	5
																															Phenylemenis-Diphenyltriazine	0	4	0	3
[truncated: 191 more columns]

[truncated: 4 more sheets: Table S5.3B-3, Table S5.3C-1, Table S5.3C-2, Table S5.3C-3]
